# Supplementary material for: Luminescent iridium(iii) dipyrrinato complexes: synthesis, X-ray structures, and DFT and photocytotoxicity studies of glycosylated derivatives
Source: Royal Society of Chemistry journal article supplement (doi:10.1039/d1dt04218a), 2022-01-01
Supplement: d1dt04218a1.pdf [file d1dt04218a1.pdf]

## ESI

### Luminescent Iridium(III) Dipyrrinato Complexes: Synthesis, X-ray Structures, DFT and Photocytotoxicity Studies of Glycosylated Derivatives

<sup>#</sup>Neha Manav,<sup>a</sup> <sup>#</sup>Mohsin Y. Lone,<sup>a</sup> Md Kausar Raza,<sup>b</sup> Jaydeepsinh Chavda,<sup>a</sup> Shigeki Mori<sup>c</sup> and Iti Gupta<sup>\*a</sup>

<sup>a</sup>Indian Institute of Technology Gandhinagar, Palaj Campus, Gandhinagar, Gujarat-382355, India.

<sup>b</sup>Department of Inorganic and Physical Chemistry, Indian Institute of Science, Bangalore-560012, India

<sup>c</sup>Advanced Research Support Center, Ehime University, Matsuyama 790-8577, Japan

<sup>#</sup>Equal Contribution, <sup>\*</sup>Corresponding author, e-mail: [iti@iitgn.ac.in](mailto:iti@iitgn.ac.in)

## LIST OF CONTENTS

**Table S1** X-ray crystal parameters of **Ir1** and **Ir4** compounds

**Table S2** Selected bond distances, bond angles and dihedral angles observed in the crystals and the DFT optimized structures of **Ir1** and **Ir4**.

**Figure S1** IR spectrum of compound **Ir1**

**Figure S2** <sup>1</sup>H NMR of compound **Ir1** in CD<sub>2</sub>Cl<sub>2</sub>.

**Figure S3** <sup>13</sup>C NMR of compound **Ir1** in CD<sub>2</sub>Cl<sub>2</sub>.

**Figure S4** MALDI-MS of compound **Ir1**.

**Figure S5** IR spectrum of compound **Ir2**.

**Figure S6** <sup>13</sup>C NMR of compound **Ir2** in CD<sub>2</sub>Cl<sub>2</sub>.

**Figure S7** Partial <sup>1</sup>H NMR and HOMO-COSY NMR spectra of compound **Ir2** in CD<sub>2</sub>Cl<sub>2</sub>.

**Figure S8** MALDI-MS of compound **Ir2**.

**Figure S9** IR spectrum of compound **Ir3**.

**Figure S10** <sup>1</sup>H NMR of compound **Ir3** in CD<sub>2</sub>Cl<sub>2</sub>.

**Figure S11** <sup>13</sup>C NMR of compound **Ir3** in CD<sub>2</sub>Cl<sub>2</sub>.

**Figure S12** MALDI-MS of compound **Ir3**.

**Figure S13** IR spectrum of compound **Ir4**.

**Figure S14** <sup>1</sup>H NMR of compound **Ir4** in CD<sub>2</sub>Cl<sub>2</sub>.

**Figure S15** <sup>13</sup>C NMR of compound **Ir4** in CD<sub>2</sub>Cl<sub>2</sub>.

**Figure S16** MALDI-MS of compound **Ir4**.

**Figure S17** IR spectrum of compound **Ir5**.

**Figure S18** <sup>1</sup>H NMR of compound **Ir5** in CD<sub>2</sub>Cl<sub>2</sub>.

**Figure S19** <sup>13</sup>C NMR of compound **Ir5** in CD<sub>2</sub>Cl<sub>2</sub>.

**Figure S20** <sup>19</sup>F NMR of compound **Ir5** in CD<sub>2</sub>Cl<sub>2</sub>.

**Figure S21** MALDI-MS of compound **Ir5**.

**Figure S22** IR spectrum of compound **Ir6**.

**Figure S23**  $^1\text{H}$  NMR of compound **Ir6** in  $\text{CD}_2\text{Cl}_2$ .

**Figure S24**  $^{13}\text{C}$  NMR of compound **Ir6** in  $\text{CD}_2\text{Cl}_2$ .

**Figure S25**  $^{19}\text{F}$  NMR of compound **Ir6** in  $\text{CD}_2\text{Cl}_2$ .

**Figure S26** MALDI-MS of compound **Ir6**.

**Figure S27** IR spectrum of compound **Ir7**.

**Figure S28**  $^1\text{H}$  NMR of compound **Ir7** in  $\text{CD}_2\text{Cl}_2$ .

**Figure S29**  $^{13}\text{C}$  NMR of compound **Ir7** in  $\text{CD}_2\text{Cl}_2$ .

**Figure S30**  $^{19}\text{F}$  NMR of compound **Ir7** in  $\text{CD}_2\text{Cl}_2$ .

**Figure S31** MALDI-MS of compound **Ir7**.

**Figure S32** IR spectrum of compound **Ir8**.

**Figure S33**  $^1\text{H}$  NMR of compound **Ir8** in  $\text{CD}_2\text{Cl}_2$ .

**Figure S34**  $^{13}\text{C}$  NMR of compound **Ir8** in  $\text{CD}_2\text{Cl}_2$ .

**Figure S35**  $^{19}\text{F}$  NMR of compound **Ir8** in  $\text{CD}_2\text{Cl}_2$ .

**Figure S36** MALDI-MS of compound **Ir8**.

**Figure S37**  $^1\text{H}$ - $^1\text{H}$  COSY of compound **Ir1** in  $\text{CD}_2\text{Cl}_2$ .

**Figure S38**  $^1\text{H}$ - $^1\text{H}$  COSY of compound **Ir2** in  $\text{CD}_2\text{Cl}_2$ .

**Figure S39**  $^1\text{H}$ - $^1\text{H}$  COSY of compound **Ir3** in  $\text{CD}_2\text{Cl}_2$ .

**Figure S40**  $^1\text{H}$ - $^1\text{H}$  COSY of compound **Ir4** in  $\text{CD}_2\text{Cl}_2$ .

**Figure S41**  $^1\text{H}$ - $^1\text{H}$  COSY of compound **Ir5** in  $\text{CD}_2\text{Cl}_2$ .

**Figure S42**  $^1\text{H}$ - $^1\text{H}$  COSY of compound **Ir6** in  $\text{CD}_2\text{Cl}_2$ .

**Figure S43**  $^1\text{H}$ - $^1\text{H}$  COSY of compound **Ir7** in  $\text{CD}_2\text{Cl}_2$ .

**Figure S44**  $^1\text{H}$ - $^1\text{H}$  COSY of compound **Ir8** in  $\text{CD}_2\text{Cl}_2$ .

**Figure S45** Singlet Oxygen study plot of **Ir5** in DMSO.

**Figure S46** Singlet Oxygen study plot of **Ir6** in DMSO.

**Figure S47** Singlet Oxygen study plot of **Ir5** in  $\text{CHCl}_3$ .

**Figure S48** Singlet Oxygen study plot of **Ir6** in  $\text{CHCl}_3$ .

**Figure S49** Singlet Oxygen study plot of **Ir7** in  $\text{CHCl}_3$ .

**Figure S50** Absorption and emission spectra of **Ir1-Ir8** in toluene.

**Figure S51** Solvatochromism of Iridium dipyrinates (**Ir1-Ir8**) in solvent (a) DMF (b) ACN (c) THF (d) DCM (e)  $\text{CCL}_4$  (f) Hexane.

**Figure S52** Emission in deoxygenated (solid) and oxygenated (dashed) solvents of iridium dipyrinates (a) Ir1 (b) Ir2 (c) Ir3 (d) Ir4.

**Figure S53** Emission in deoxygenated (solid) and oxygenated (dashed) solvents of iridium dipyrinates (a) Ir5 (b) Ir6 (c) Ir7.

**Figure S54** Cell Viability plots in the absence of light (Dark); (a) HaCaT and (b) A549 cell lines treated with iridium dipyrinates **Ir6** and **Ir7** and ligand after 24 h incubation.

**Figure S55** MALDI-MS of compound **WS-Ir6**.

**Figure S56** IR spectrum of compound **WS-Ir6**.

**Figure S57** Comparison of absorption spectra of **Ir5**, **Ir6**, and, **WS-Ir6**.

**Figure S58** MALDI-MS of compound **WS-Ir7**.

**Figure S59** IR spectrum of compound **WS-Ir7**.

**Figure S60** Comparison of absorption spectra of **Ir5**, **Ir7**, and, **WS-Ir7**.

**Figure S61** Singlet oxygen generation studies: (a) **Rose Bengal**, (c) **Ir6**, and (e) **Ir7** in water.

**Figure S62** Cell Viability plots in the presence of light on A549 and HaCaT cells for **Ir6** and **Ir7** in PBS.

**Figure S63** Cell Viability plots in the (dark and light conditions) on A549 cell lines treated with water soluble iridium dipyrinates (**WS-Ir6** and **WS-Ir7**) after 24 h incubation.

**Figure S64** Confocal microscopic image of (a) **Ir6** (top) and (b) **Ir7** (bottom), showing red emission in HaCaT cells after 24-hour incubation in dark.

**Figure S65** DFT-D3 based geometry optimized structure of iridium dipyrinates **Ir1-Ir8**.

**Table S3.** Calculated electronic excitation energies and corresponding orbitals involved in the transition for **Ir1-Ir8** using CPCM-TD-BMK/6-311+ G (2d,p) level of approximation

**Table S4** B3LYP/6-31G//B3LYP/LANL2DZ gas phase optimized coordinates of complexes **Ir1-Ir8**.

**Table S1.** X-ray crystal structure parameters of **Ir1** and **Ir4** complexes.

| Complex                       | Ir1                                                                                                               | Ir4                                                                                                               |
|-------------------------------|-------------------------------------------------------------------------------------------------------------------|-------------------------------------------------------------------------------------------------------------------|
| Empirical Formula             | C <sub>35</sub> H <sub>25</sub> IrN <sub>4</sub> S                                                                | C <sub>42</sub> H <sub>28</sub> Cl <sub>3</sub> IrN <sub>6</sub> S <sub>2</sub>                                   |
| Crystal System                | Monoclinic                                                                                                        | Triclinic                                                                                                         |
| Space Group                   | P21/n (no. 14)                                                                                                    | P-1 (no. 2)                                                                                                       |
| $R_1$ ( $I > 2.00\sigma(I)$ ) | 0.0345                                                                                                            | 0.0605                                                                                                            |
| $wR_2$ (All reflections)      | 0.0675                                                                                                            | 0.1351                                                                                                            |
| GOF                           | 0.976                                                                                                             | 0.974                                                                                                             |
| Lattice Parameters            | a = 14.5183(4) Å<br>b = 9.2894(3) Å<br>c = 20.2339(6) Å<br>$\beta$ = 93.517(3)°<br>V = 2723.73(14) Å <sup>3</sup> | a = 9.3922(6) Å<br>b = 13.6988(11) Å<br>c = 16.1785(6) Å<br>$\beta$ = 106.405(5)°<br>V = 1826.3(2) Å <sup>3</sup> |
| Z                             | 4                                                                                                                 | 2                                                                                                                 |
| T                             | -173.0°C                                                                                                          | -173.0°C                                                                                                          |
| $D_{\text{calc}}$             | 1.770 g/cm <sup>3</sup>                                                                                           | 1.781 g/cm <sup>3</sup>                                                                                           |
| $F_{000}$                     | 1424.0                                                                                                            | 964.0                                                                                                             |
| $2\theta_{\text{max}}$        | 4.03 to 55.99°                                                                                                    | 4.60 to 51.99°                                                                                                    |
| No. of Reflections Measured   | Total: 49498 Unique: 6571 (Rint = 0.0835)                                                                         | Total: 50381 Unique: 7164 (Rint = 0.1403)                                                                         |
| CCDC number                   | 2022646                                                                                                           | 2022648                                                                                                           |

**Table S2.** Selected bond distances, bond angles and dihedral angles observed in the crystals and the DFT optimized structures of **Ir1** and **Ir4**.

| Complex                             | Dihedral Angles (°)                                       | Bond Angles (°)                                                                  | Bond Distances (Å)                                                   |                                                                           |
|-------------------------------------|-----------------------------------------------------------|----------------------------------------------------------------------------------|----------------------------------------------------------------------|---------------------------------------------------------------------------|
| <b>Ir1</b><br>(Crystal structure)   | C26–C27–C32–S1<br>50.61(5)<br>C28–C27–C32–C33<br>52.33(8) | N3–Ir–N4 85.8(1)<br>N3–Ir–C18 175.6(1)<br>N1–Ir–N2 173.8(1)<br>N4–Ir–C7 172.3(1) | Ir–N1 2.044(3)<br>Ir–N2 2.044(3)<br>Ir–N3 2.126(3)<br>Ir–N4 2.127(3) | Ir–C7 2.018(4)<br>Ir–C18 2.010(4)<br>C27–C32 1.483<br>S1–C32 1.742(5)     |
| <b>Ir1</b><br>(Optimized structure) | C26–C27–C32–S1<br>63.62<br>C28–C27–C32–C33<br>60.97       | N3–Ir–N4 85.1<br>N3–Ir–C18 174.7<br>N1–Ir–N2 174.9<br>N4–Ir–C7 174.7             | Ir–N1 2.077<br>Ir–N2 2.078<br>Ir–N3 2.192<br>Ir–N4 2.196             | Ir–C7 2.028<br>Ir–C18 2.028<br>C27–C32 1.485<br>S1–C32 1.754              |
| <b>Ir4</b><br>(Crystal structure)   | C26–C27–C32–S1<br>75.96(1)<br>C28–C27–C32–C33<br>73.46(1) | N3–Ir–N4 87.2(3)<br>N3–Ir–C18 175.0(3)<br>N1–Ir–N2 174.2(3)<br>N4–Ir–C7 176.6(3) | Ir–N1 2.036(6)<br>Ir–N2 2.042(6)<br>Ir–N3 2.115(7)<br>Ir–N4 2.142(7) | Ir–C7 2.020(1)<br>Ir–C18 2.019(9)<br>C27–C32 1.487 (1)<br>S1–C32 1.709(7) |
| <b>Ir4</b><br>(Optimized structure) | C26–C27–C32–S1<br>62.37<br>C28–C27–C32–C33<br>60.47       | N3–Ir–N4 85.10<br>N3–Ir–C18 174.5<br>N1–Ir–N2 174.7<br>N4–Ir–C7 174.9            | Ir–N1 2.077<br>Ir–N2 2.076<br>Ir–N3 2.196<br>Ir–N4 2.195             | Ir–C7 2.028<br>Ir–C18 2.028<br>C27–C32 1.484<br>S1–C32 1.748              |

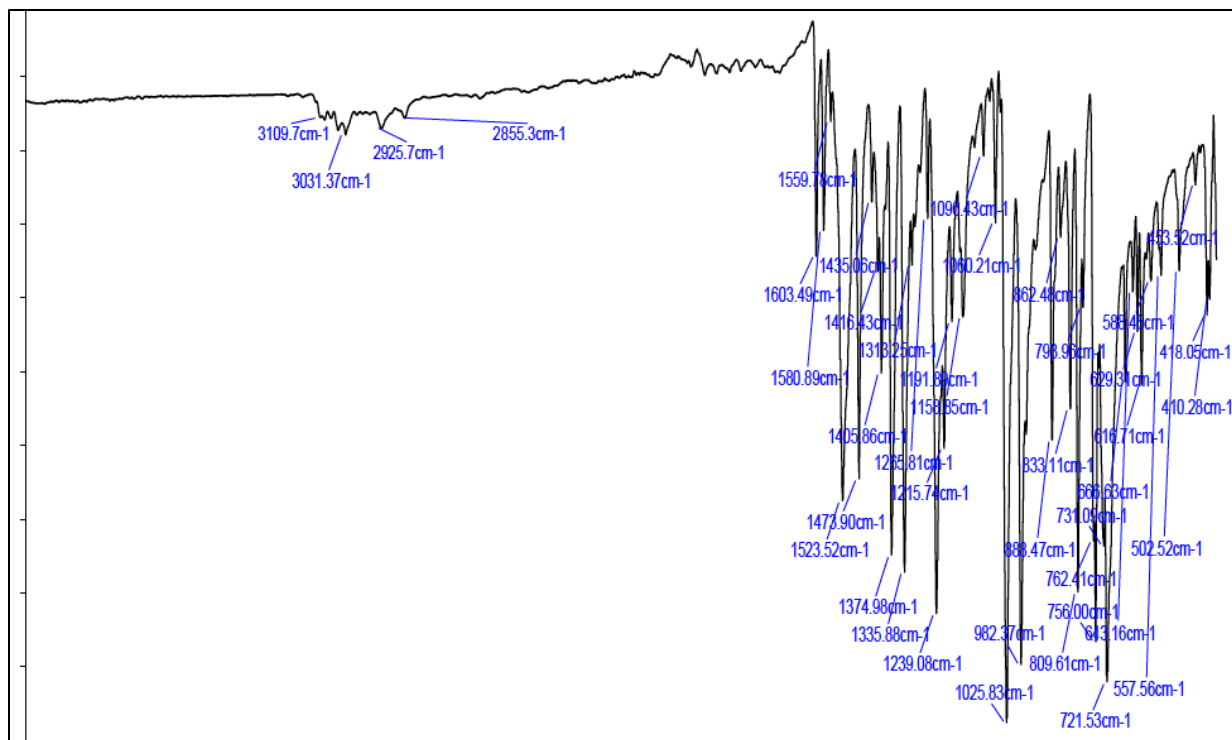

Figure S1 IR spectrum of compound Ir1.

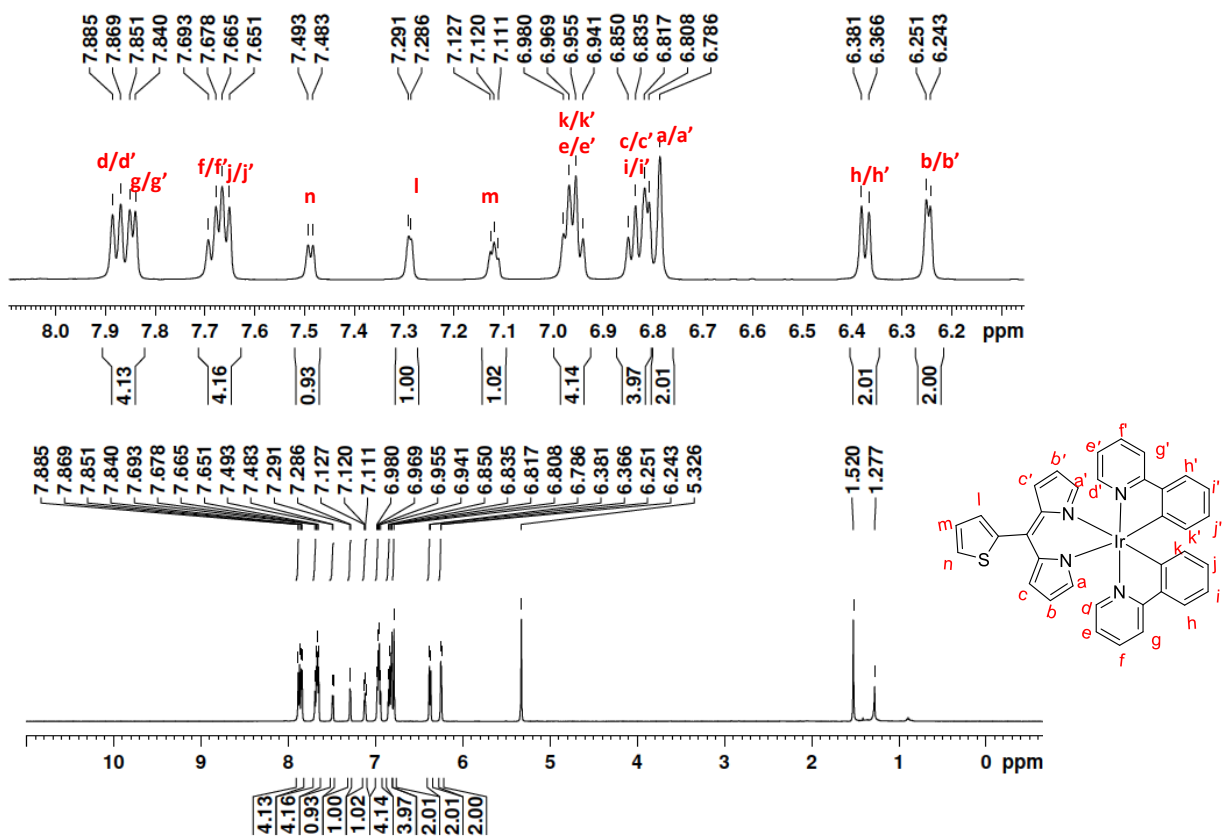

Figure S2 <sup>1</sup>H NMR of compound Ir1 in CD<sub>2</sub>Cl<sub>2</sub>.

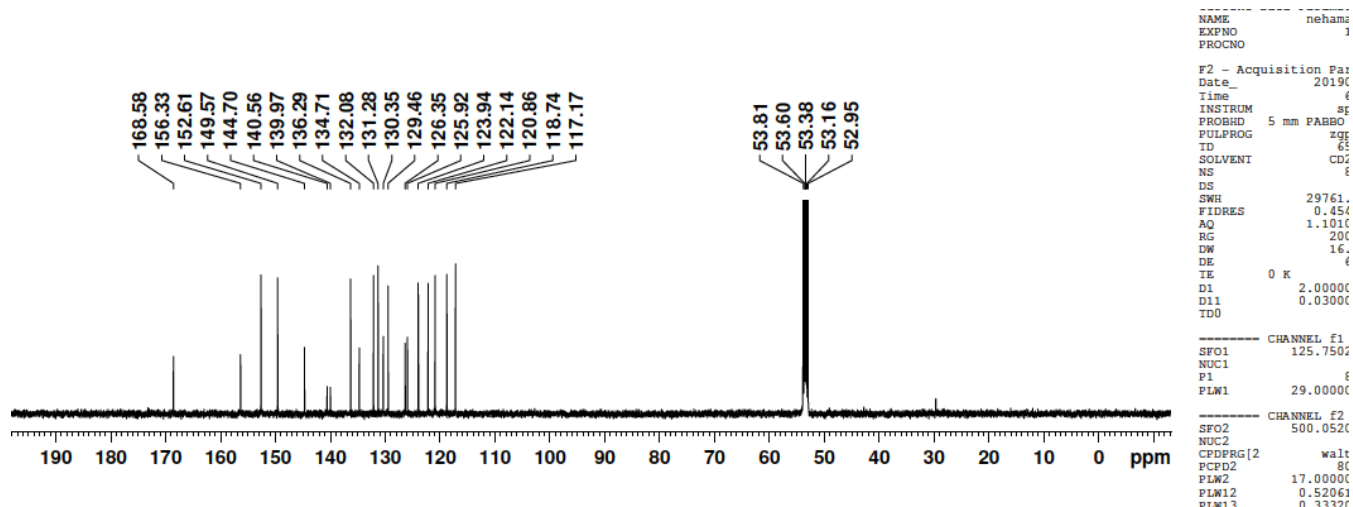

Figure S3  $^{13}\text{C}$  NMR of compound Ir1 in  $\text{CD}_2\text{Cl}_2$ .

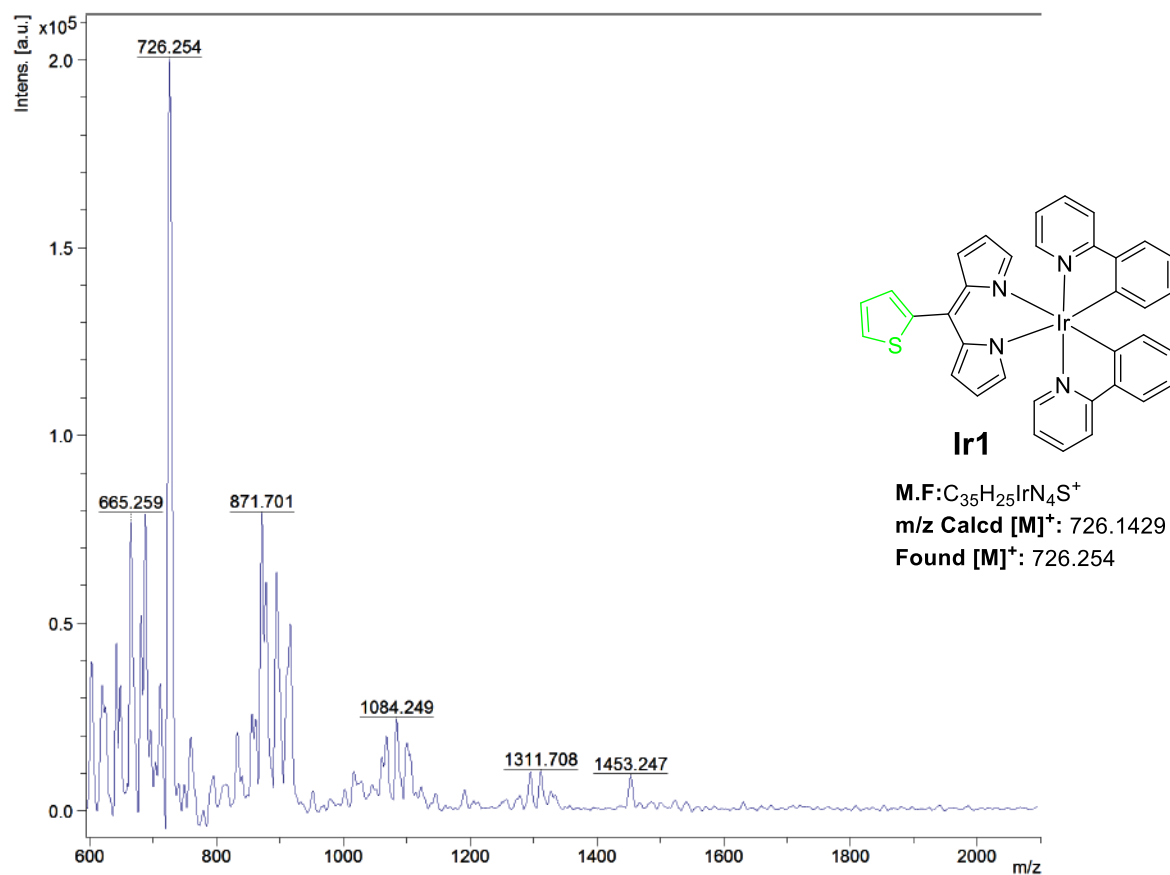

Figure S4 MALDI-MS of compound Ir1.

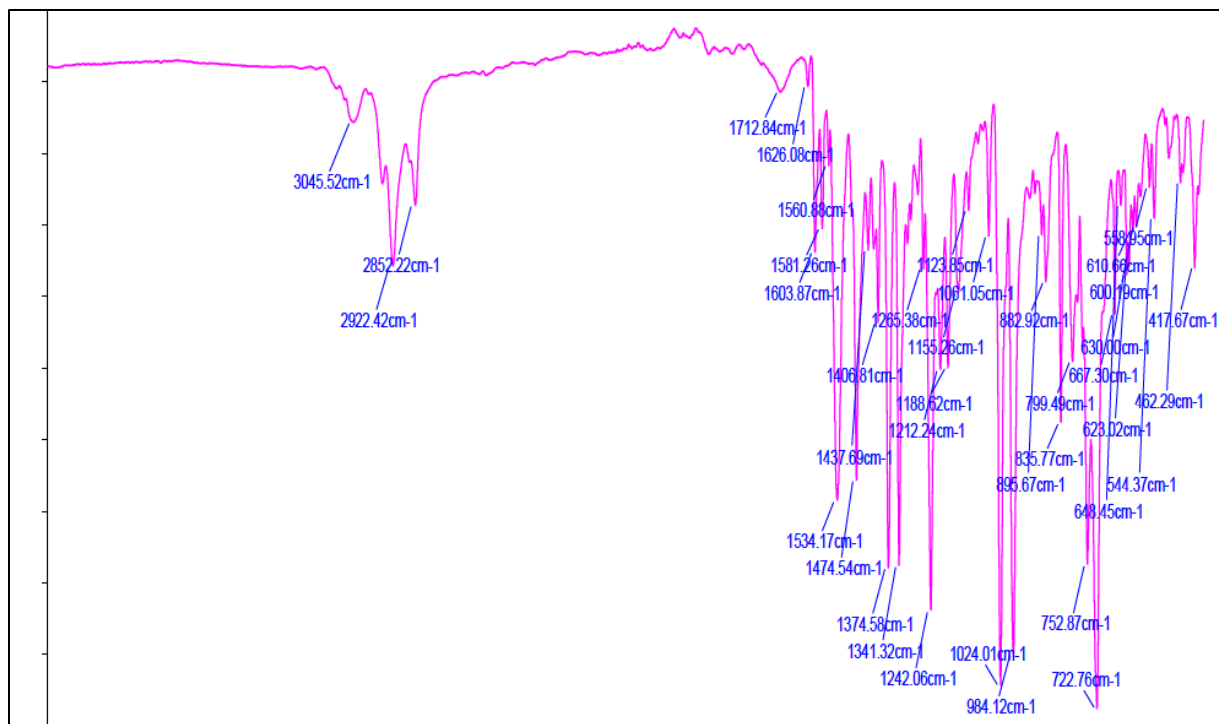

Figure S5 IR spectrum of compound Ir2.

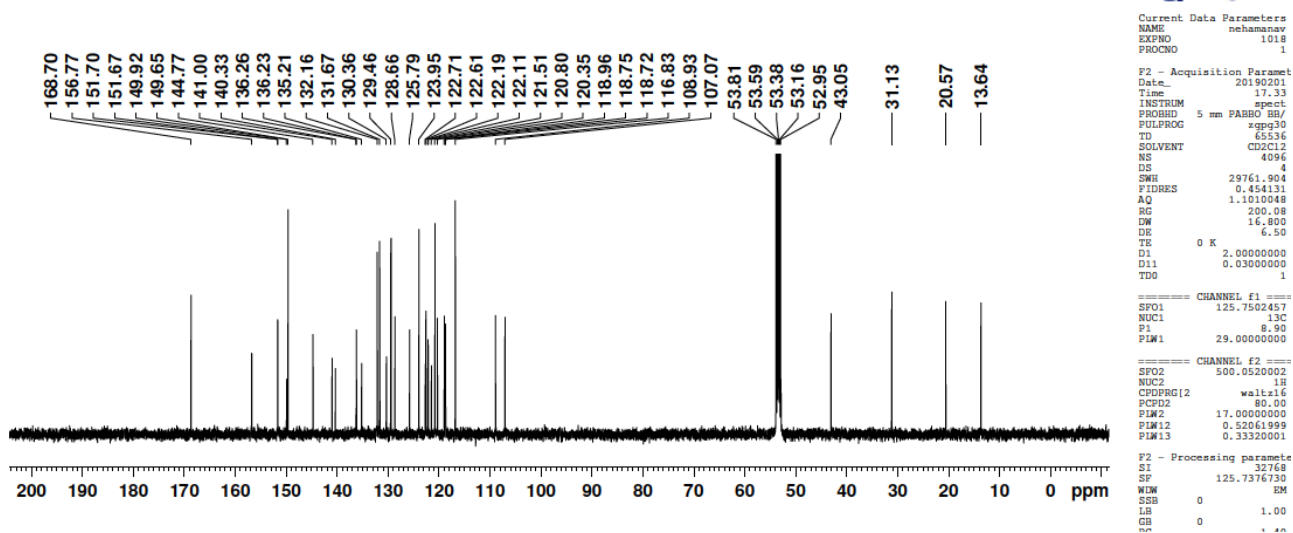

Figure S6  $^{13}\text{C}$  NMR of compound Ir2 in  $\text{CD}_2\text{Cl}_2$ .

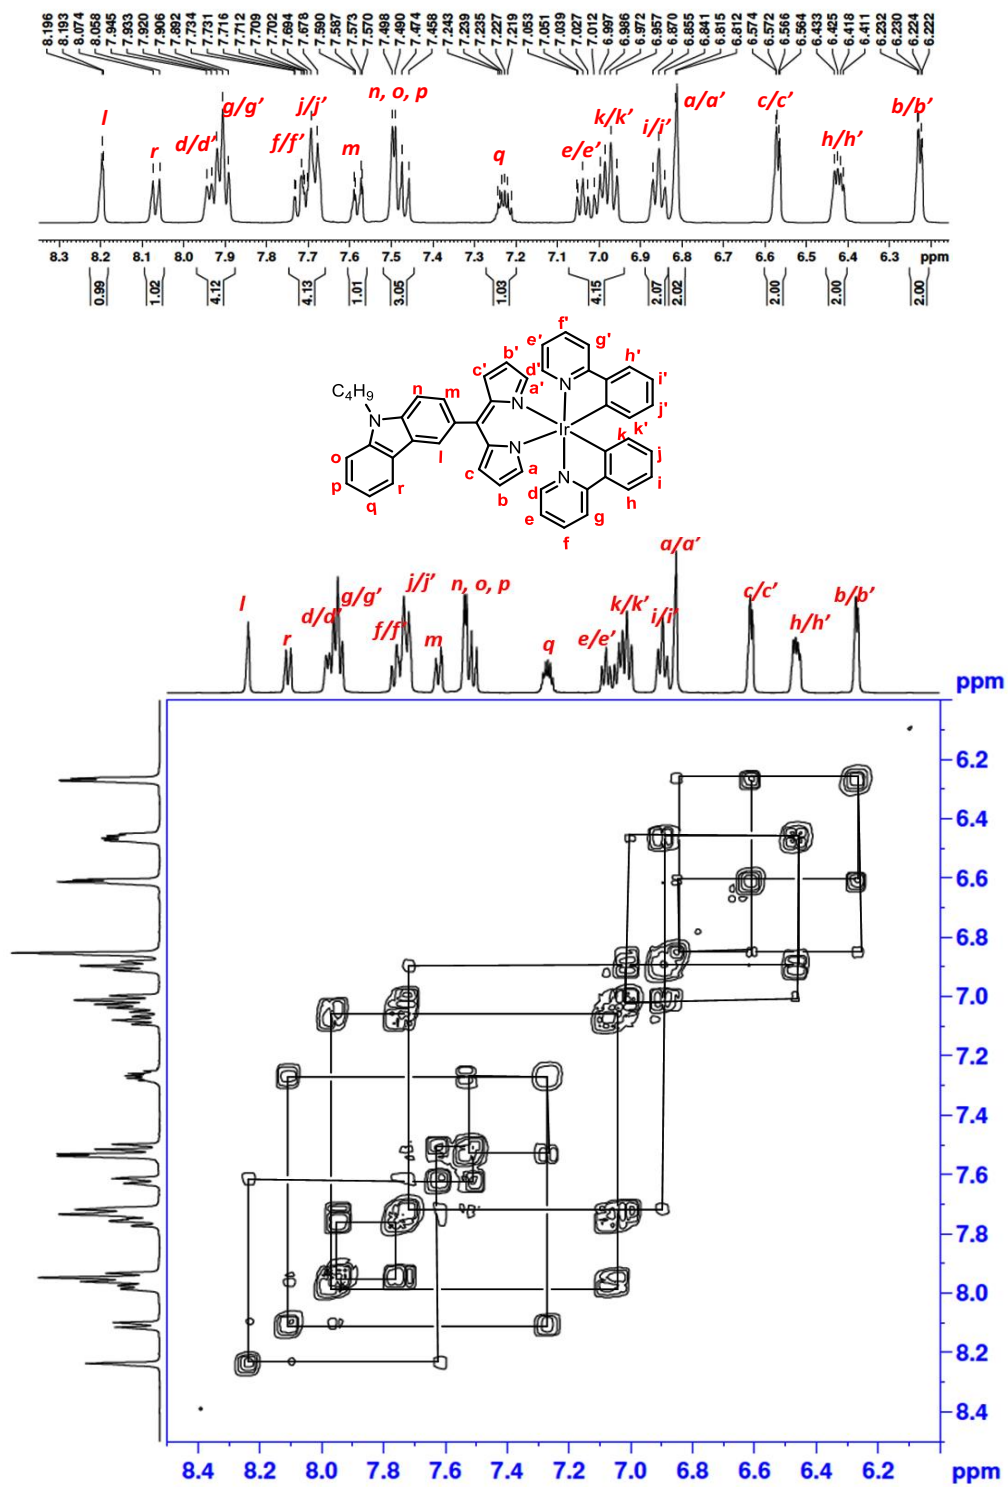

**Figure S7.** Partial  $^1\text{H}$  NMR and  $^1\text{H}$ - $^1\text{H}$  COSY spectra of **Ir2**, recorded in  $\text{CD}_2\text{Cl}_2$ .



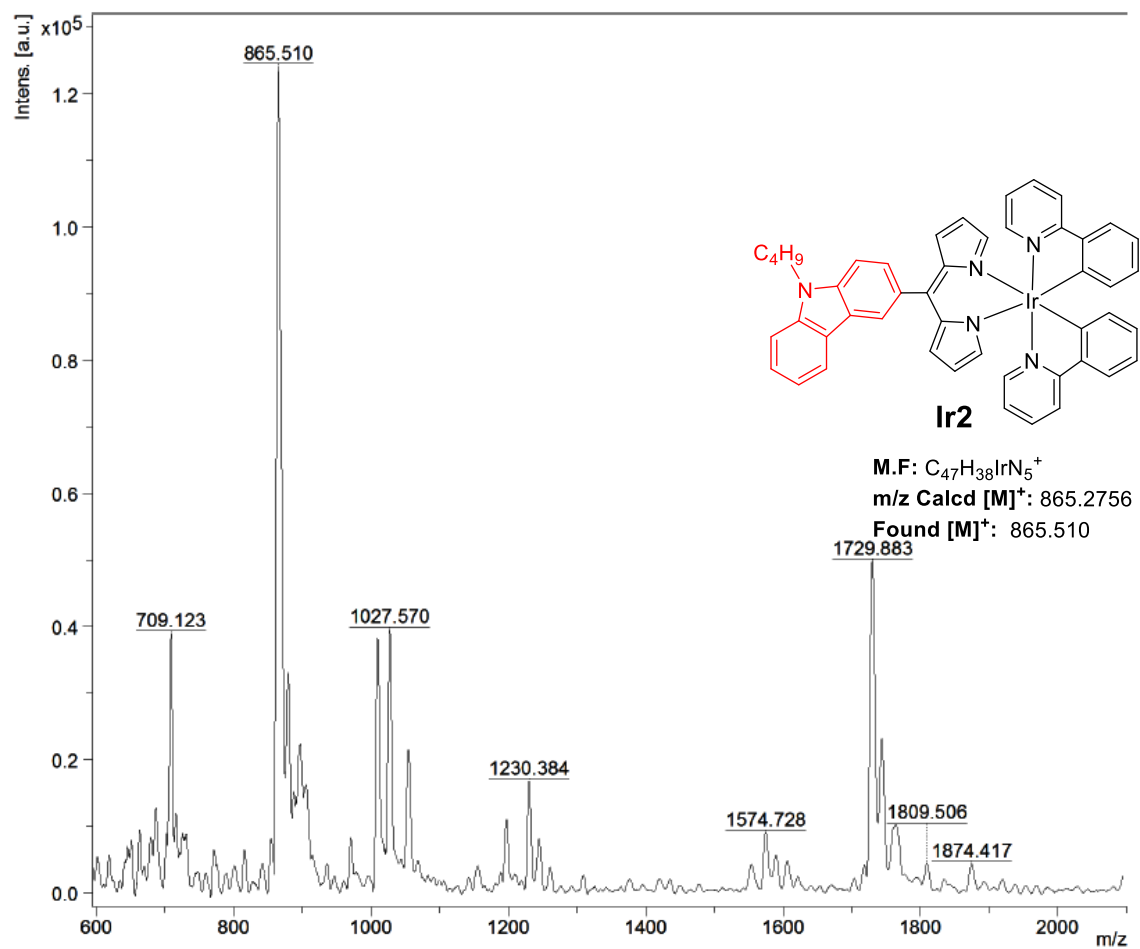

**Figure S6** MALDI-MS of compound **Ir2**.

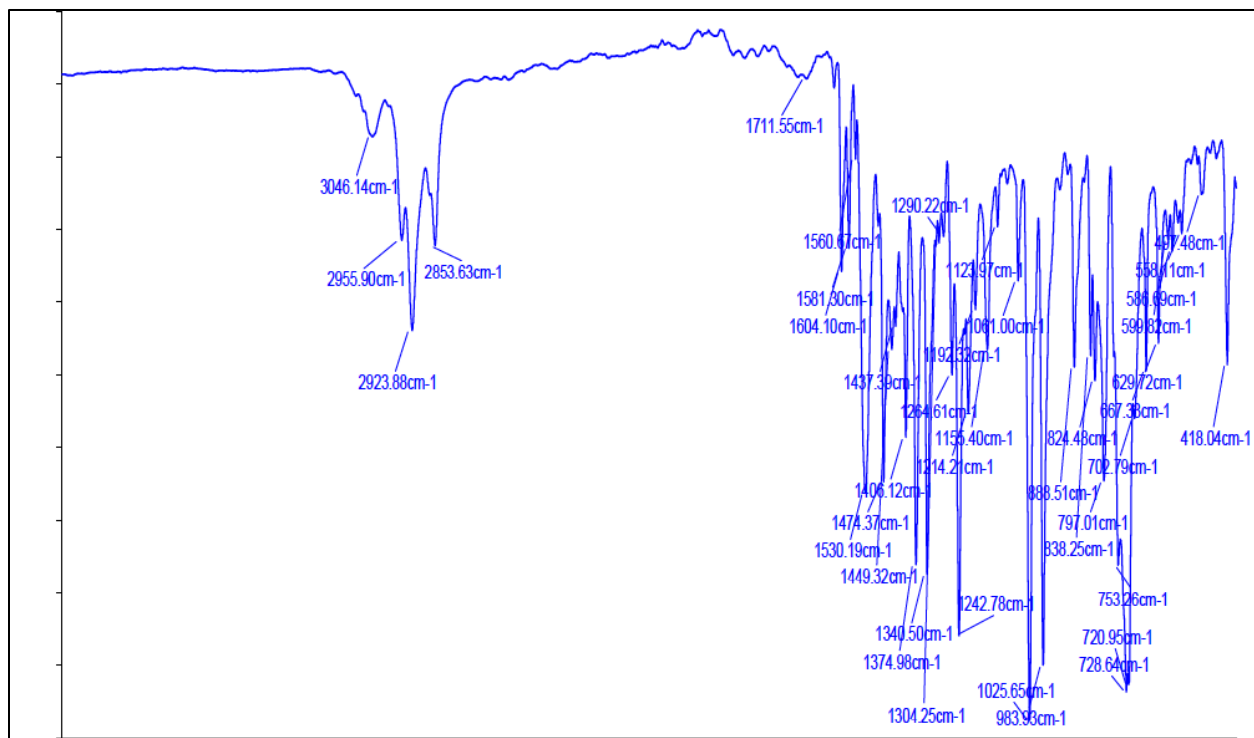

Figure S7 IR spectrum of compound Ir3.

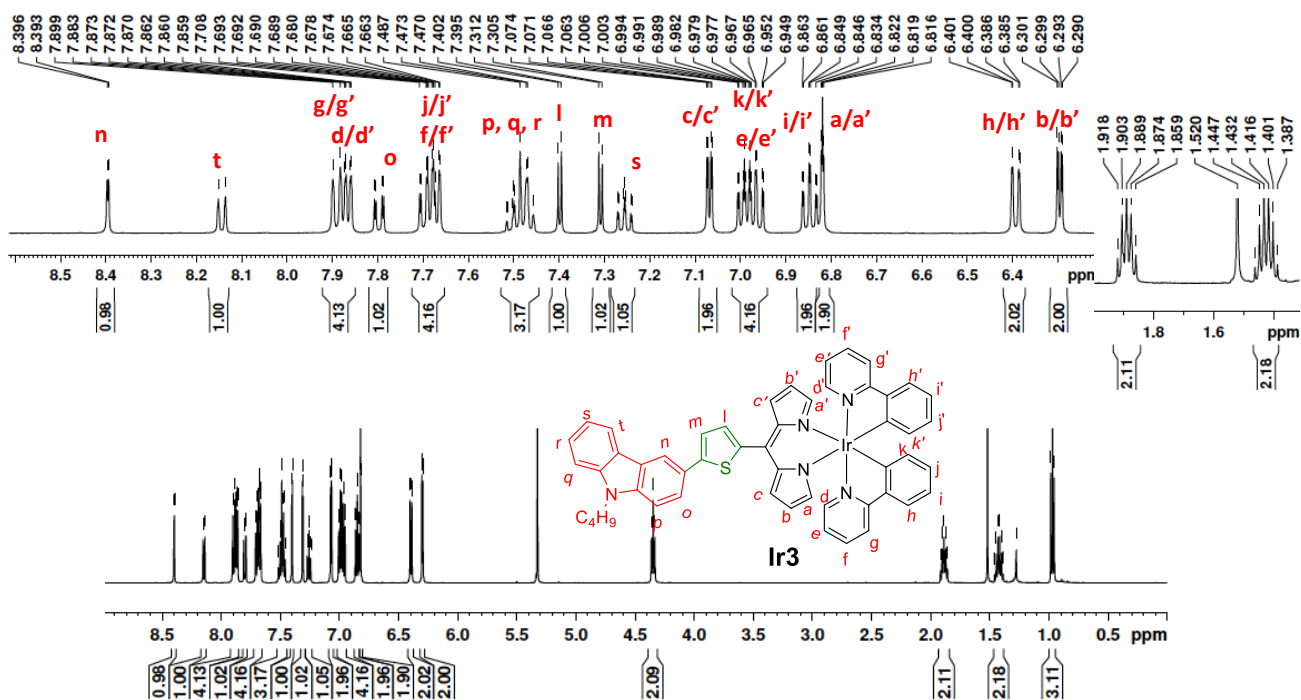

Figure S8 <sup>1</sup>H NMR of compound Ir3 in CD<sub>2</sub>Cl<sub>2</sub>.

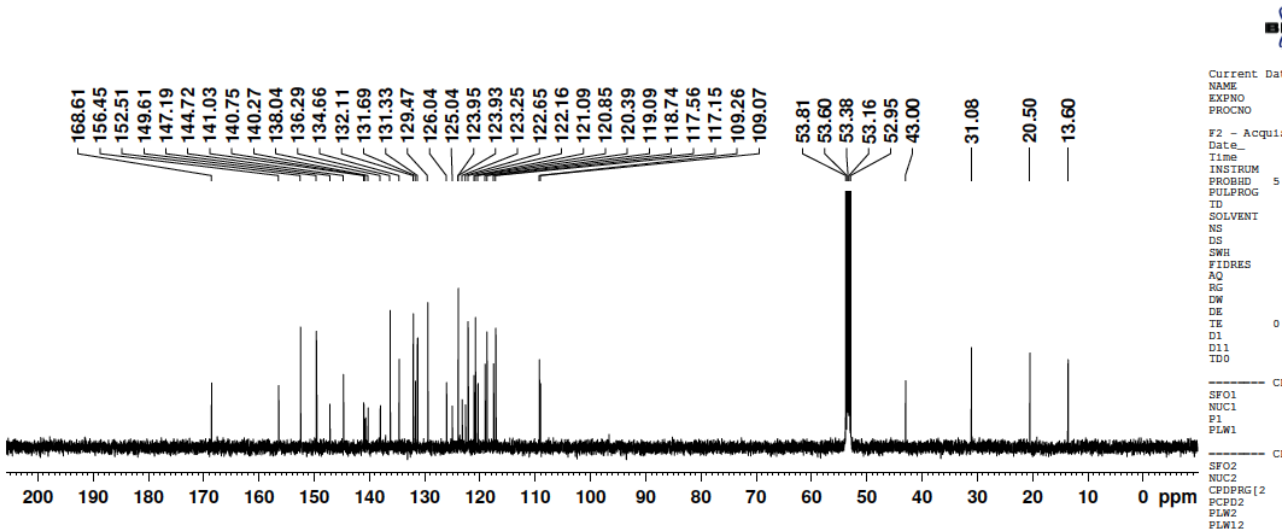

Figure S9  $^{13}\text{C}$  NMR of compound **Ir3** in  $\text{CD}_2\text{Cl}_2$ .

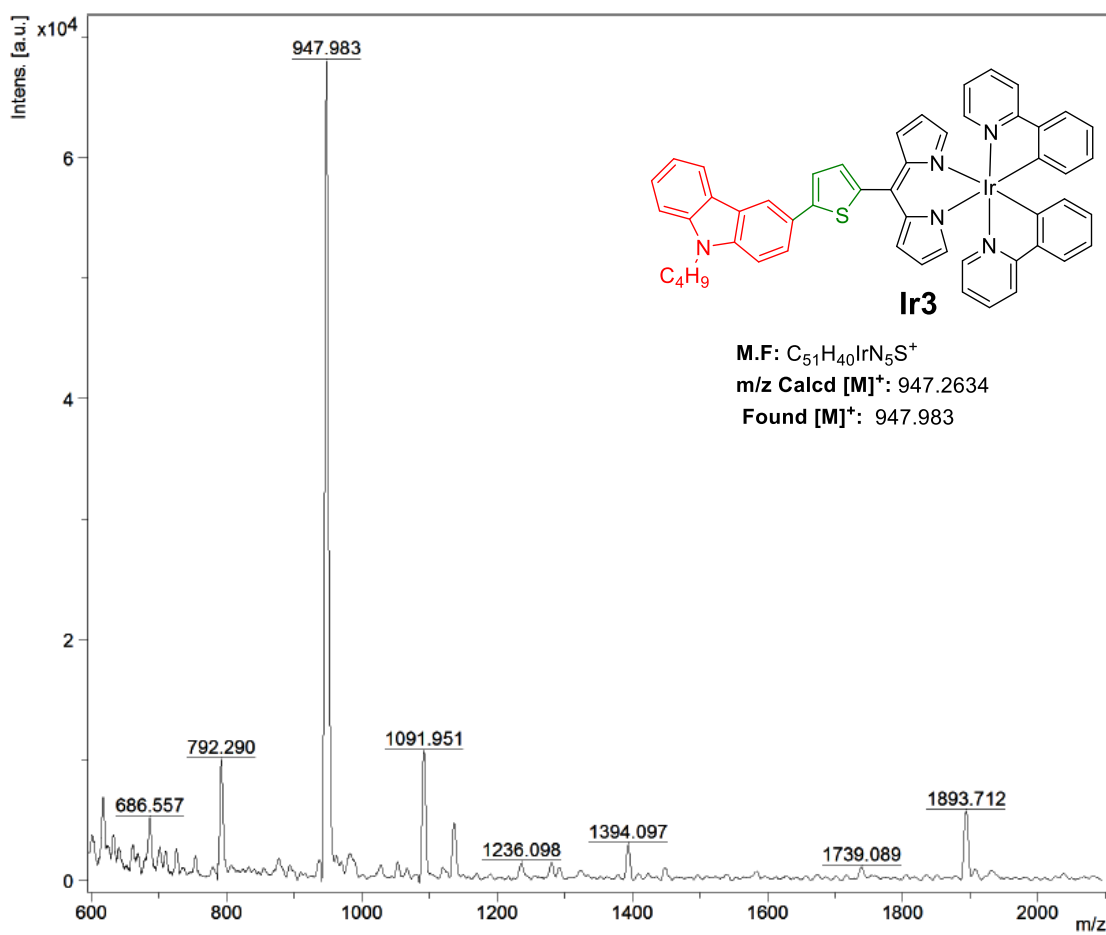

Figure S10 MALDI-MS of compound **Ir3**.

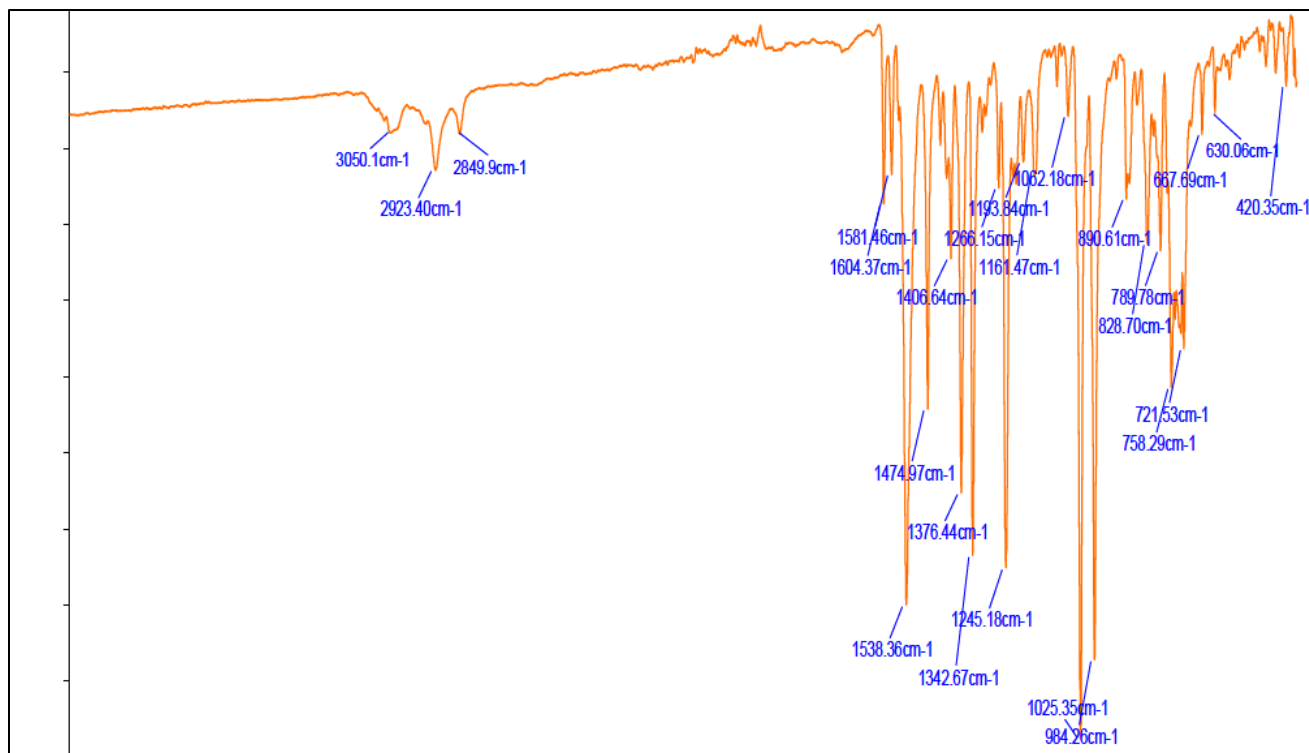

Figure S11 IR spectrum of compound Ir4.

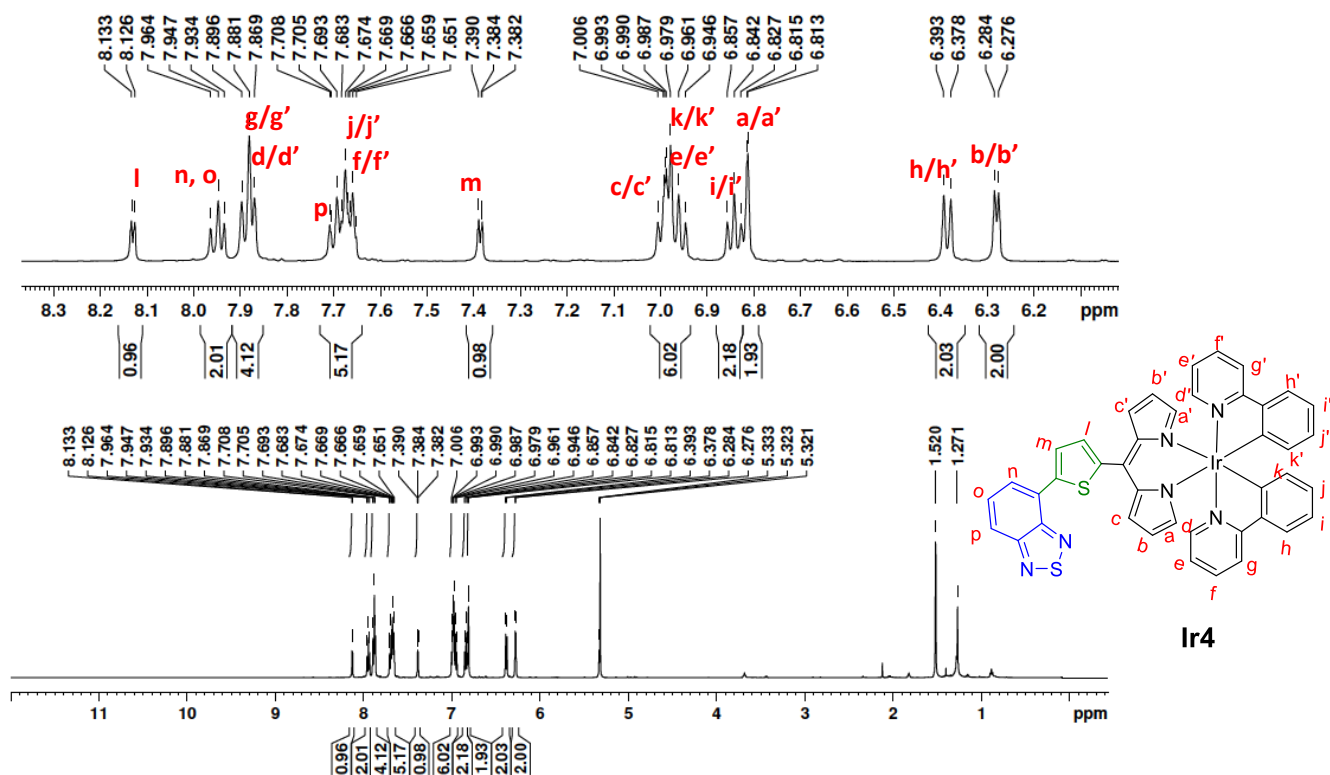

Figure S12  $^1\text{H}$  NMR of compound Ir4 in  $\text{CD}_2\text{Cl}_2$ .

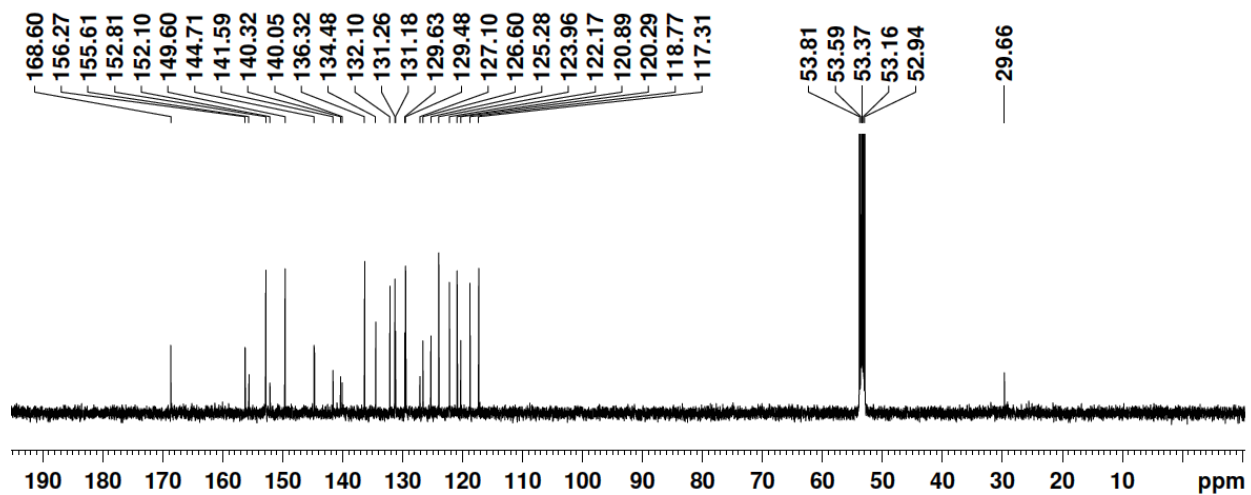

**Figure S13**  $^{13}\text{C}$  NMR of compound **Ir4** in  $\text{CD}_2\text{Cl}_2$ .

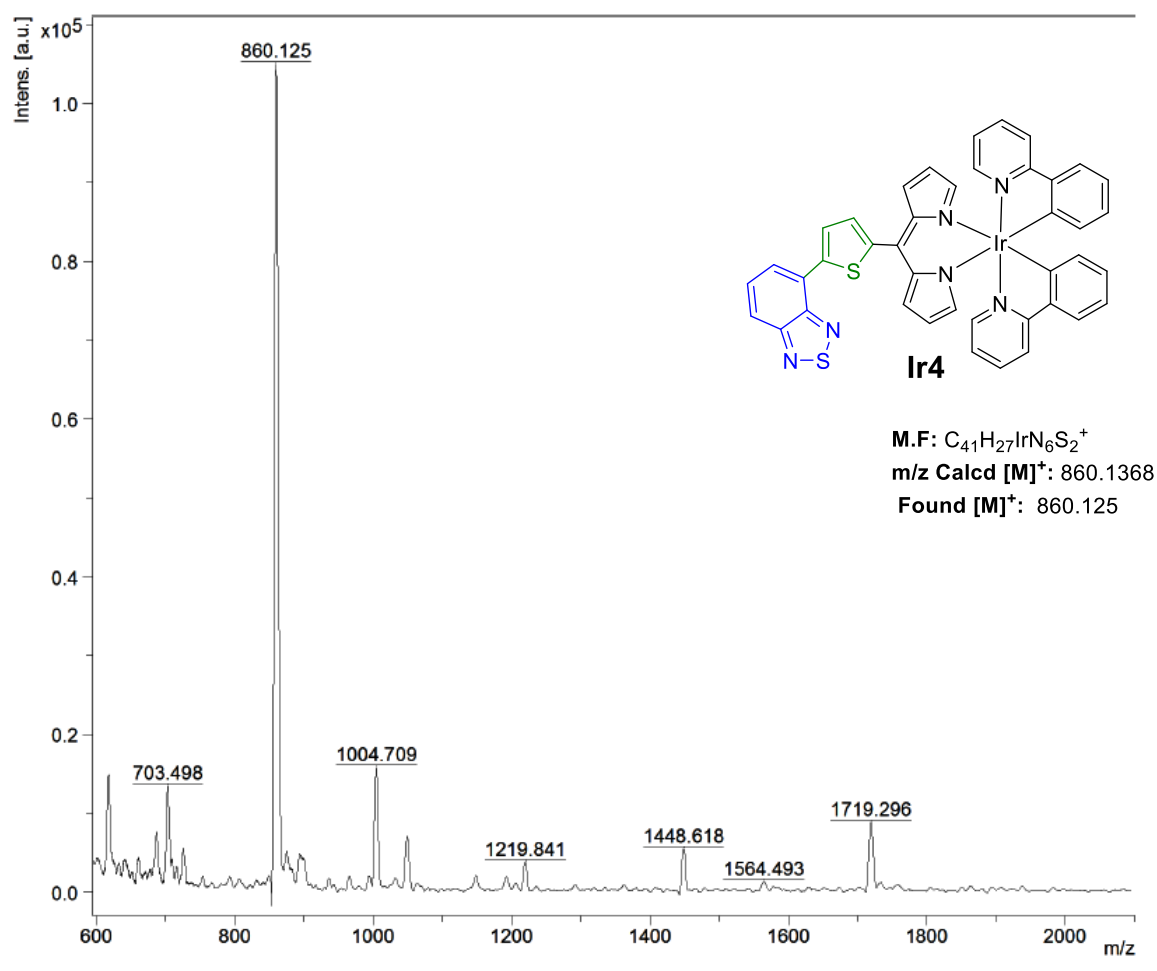

**Figure S14** MALDI-MS of compound **Ir4**.

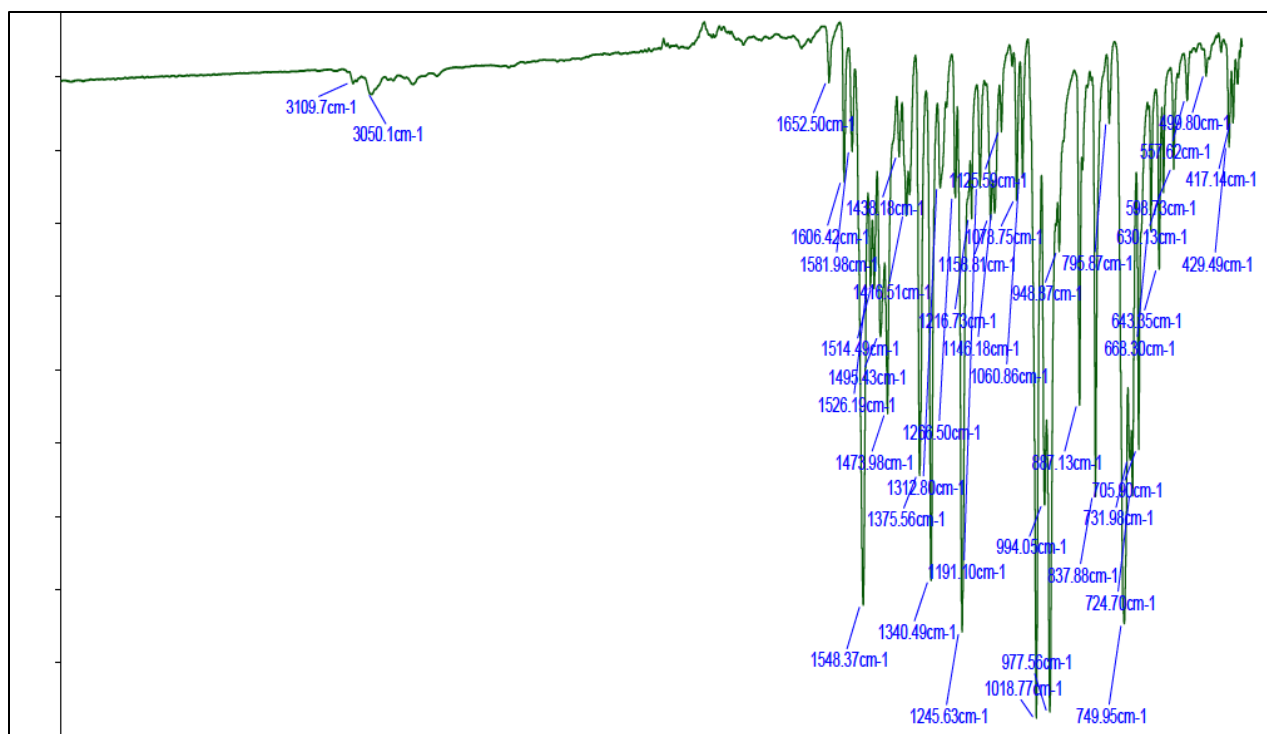

Figure S15 IR spectrum of compound Ir5.

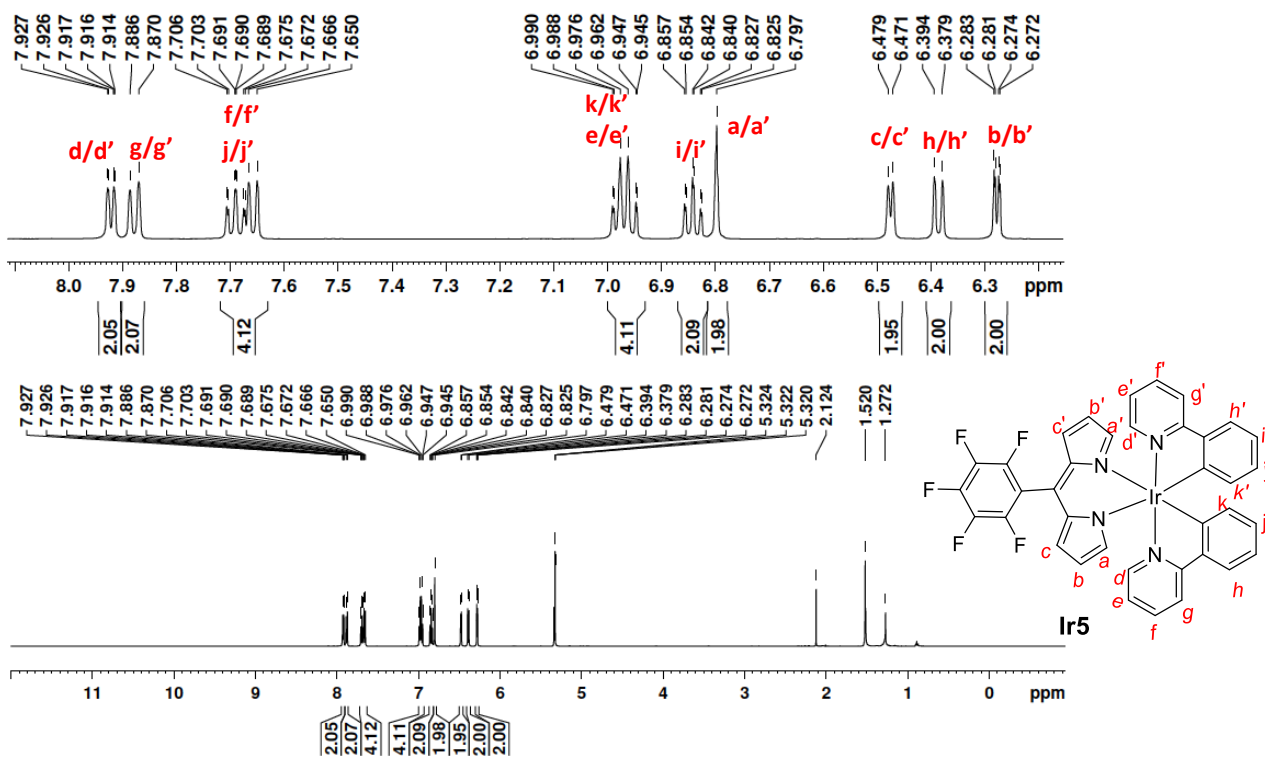

Figure S16 <sup>1</sup>H NMR of compound Ir5 in CD<sub>2</sub>Cl<sub>2</sub>.

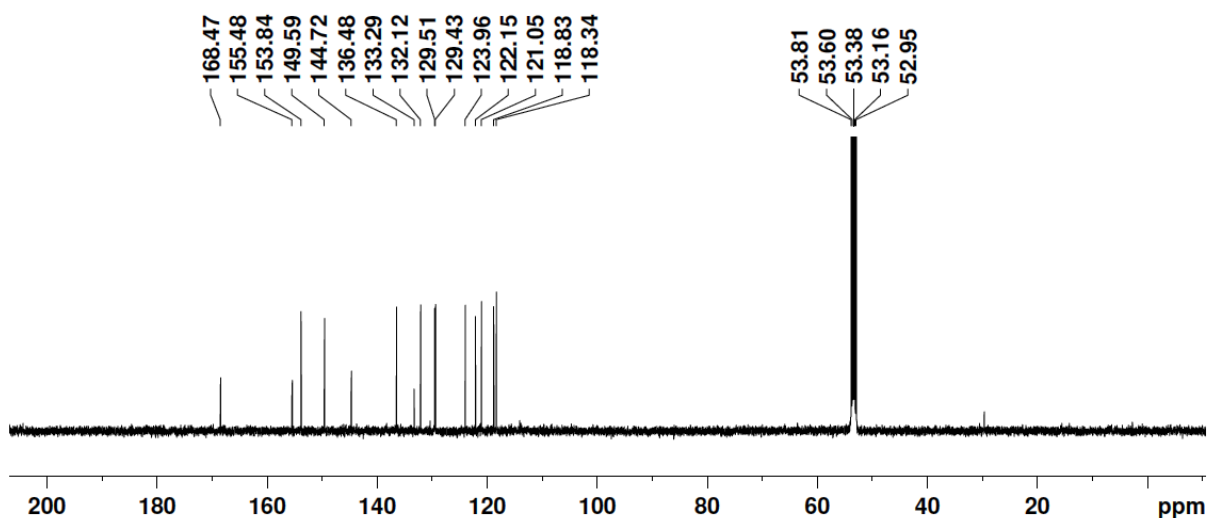

Figure S17  $^{13}\text{C}$  NMR of compound Ir5 in  $\text{CD}_2\text{Cl}_2$ .

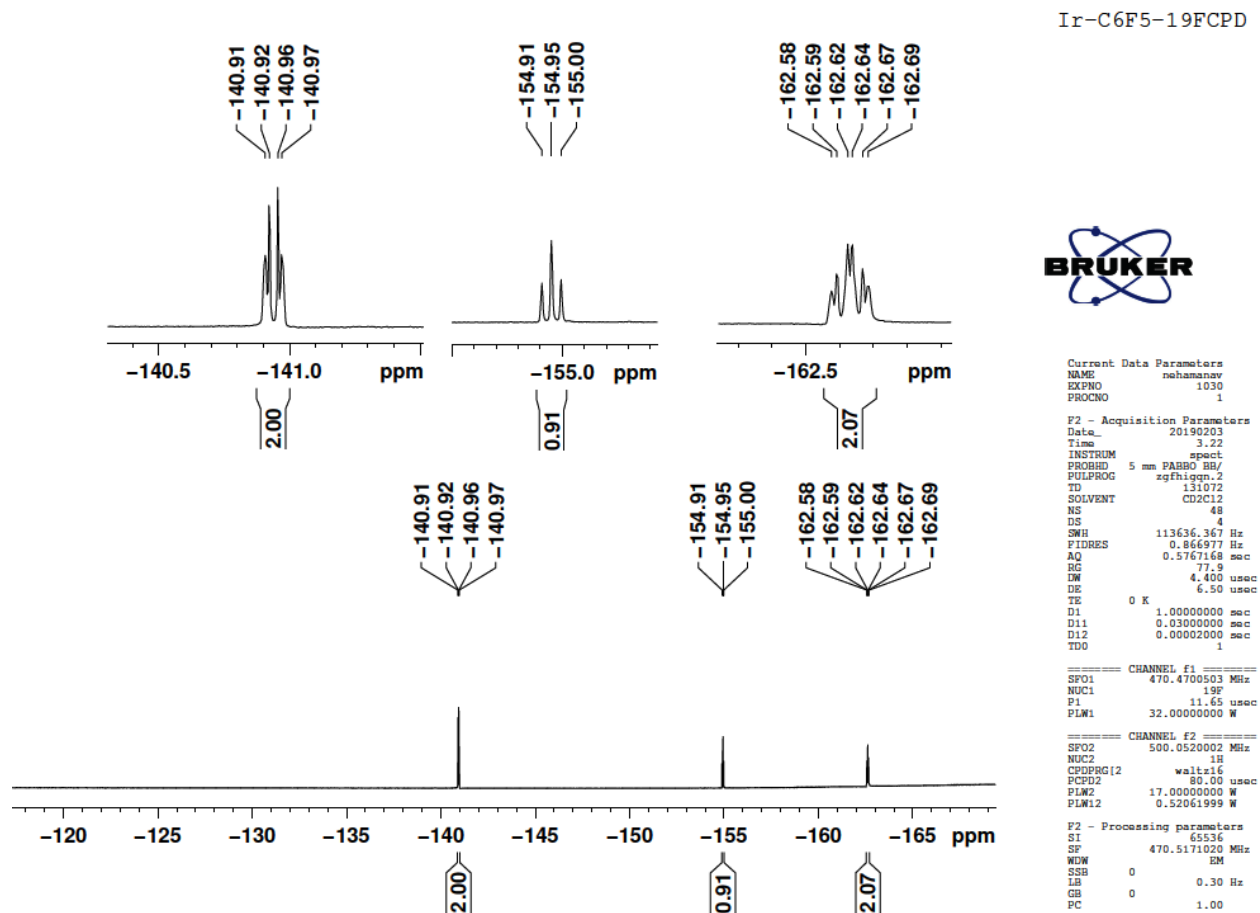

Figure S18  $^{19}\text{F}$  NMR of compound Ir5 in  $\text{CD}_2\text{Cl}_2$ .

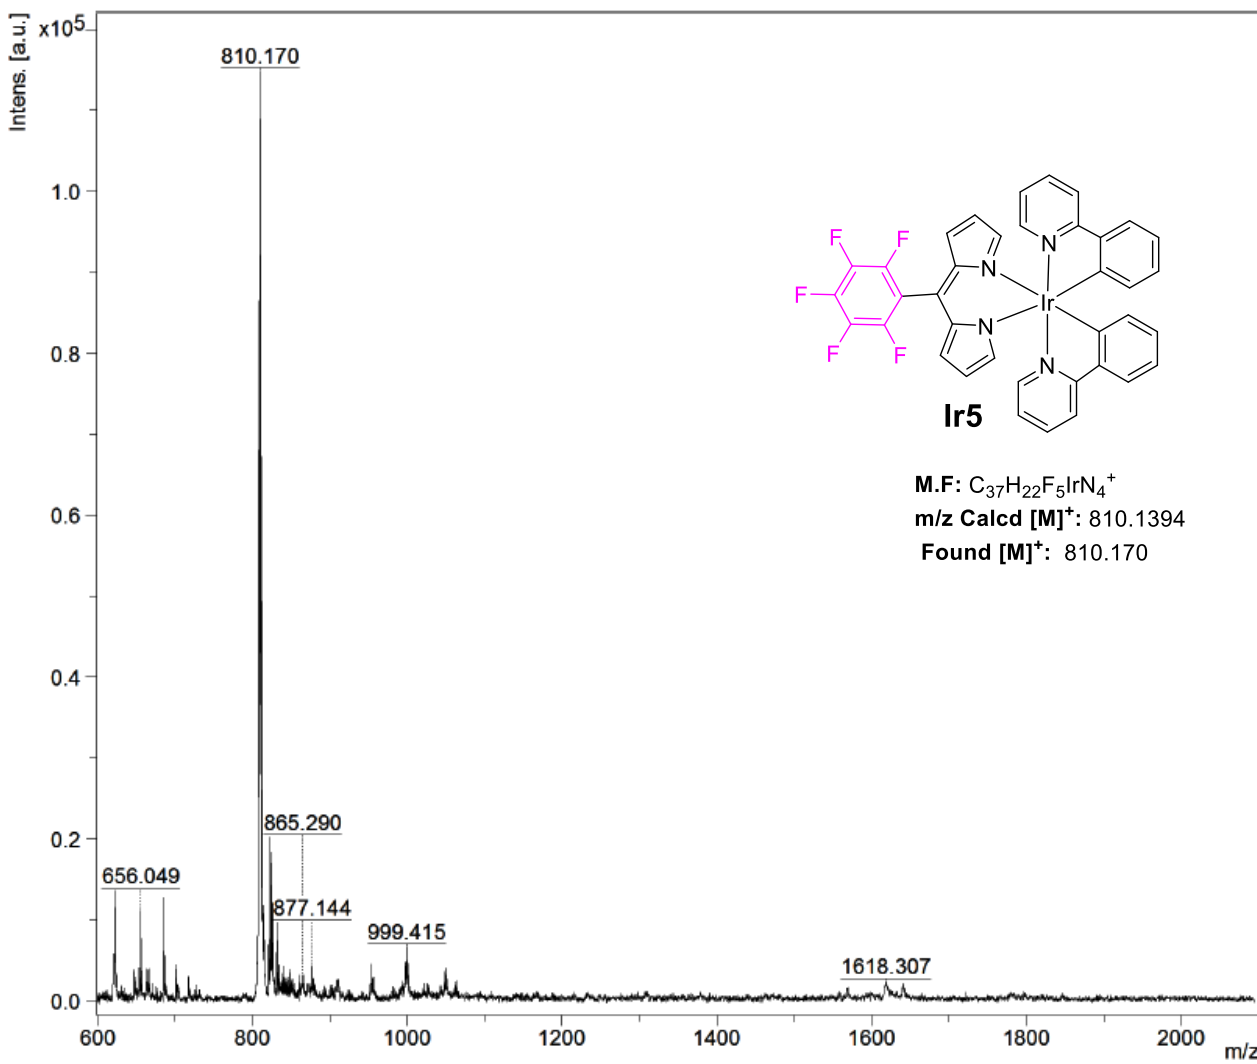

**Figure S19** MALDI-MS of compound **Ir5**.



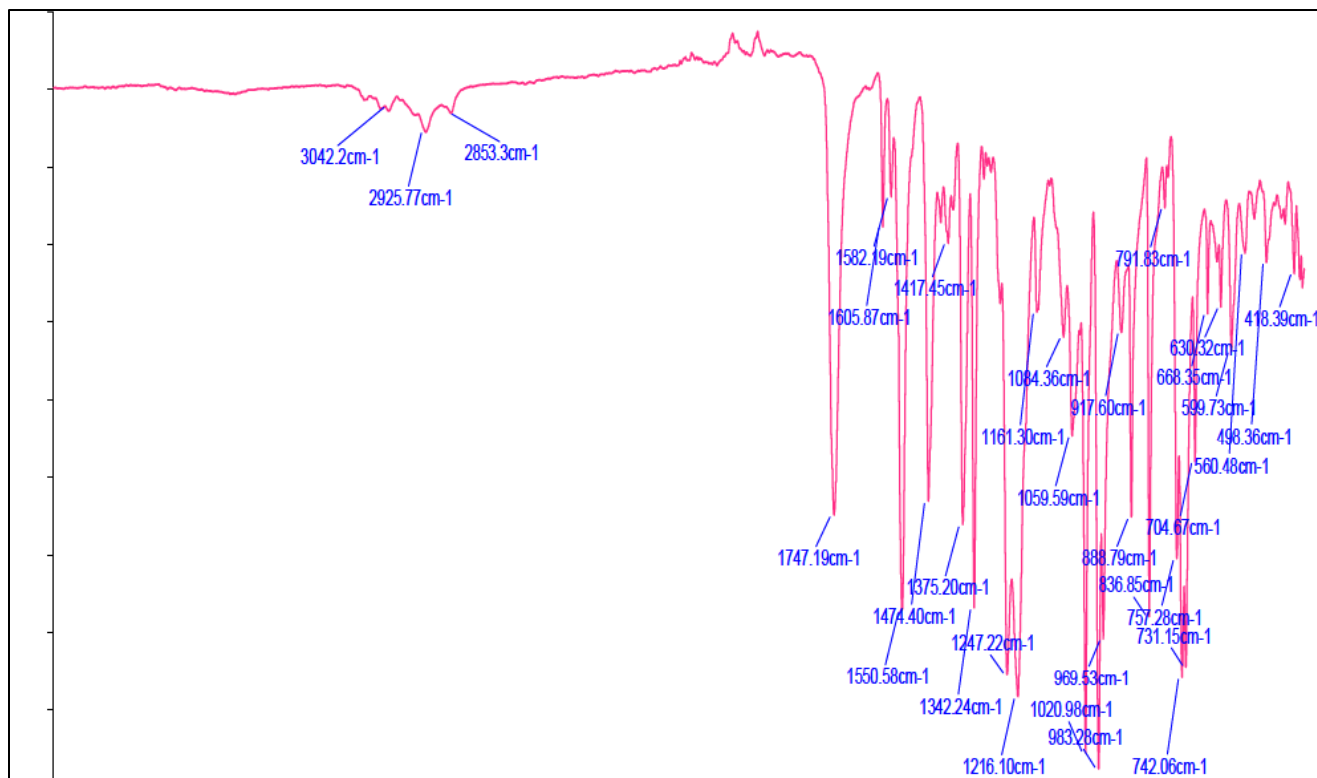

Figure S20 IR spectrum of compound Ir6.

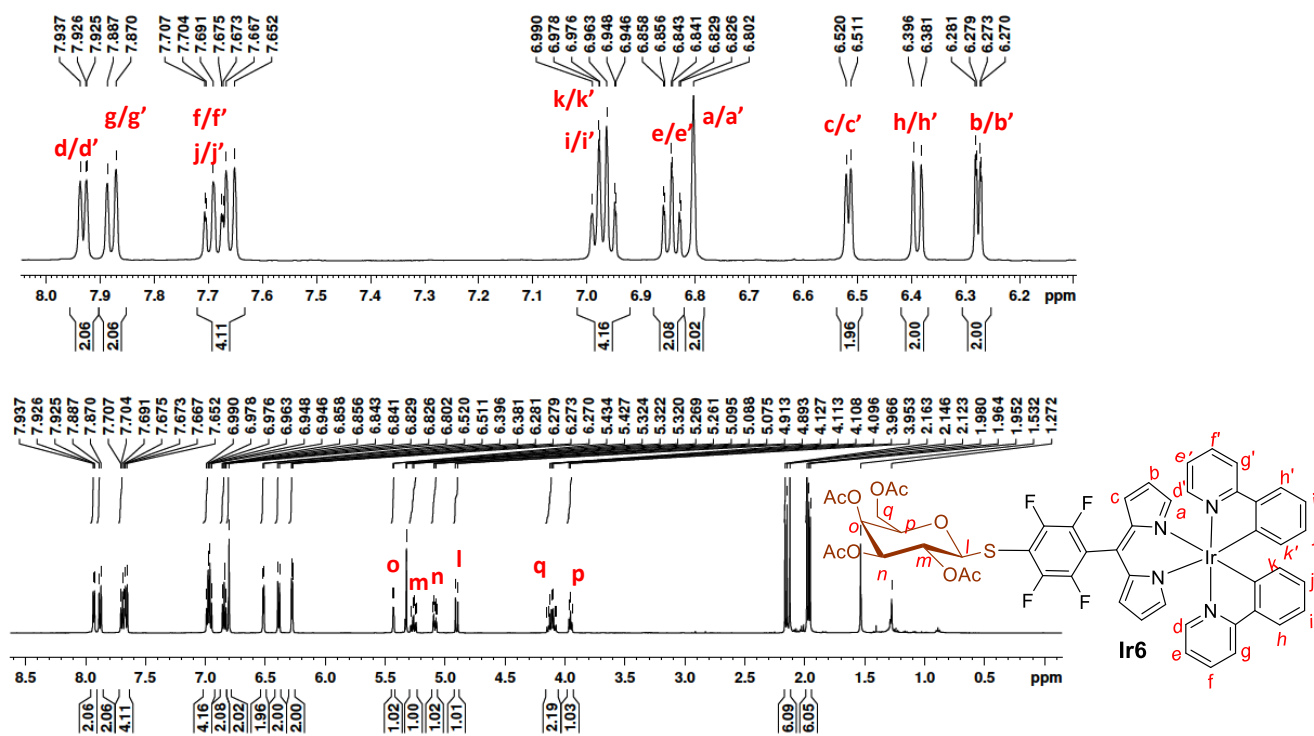

Figure S21  $^1\text{H}$  NMR of compound Ir6 in  $\text{CD}_2\text{Cl}_2$ .

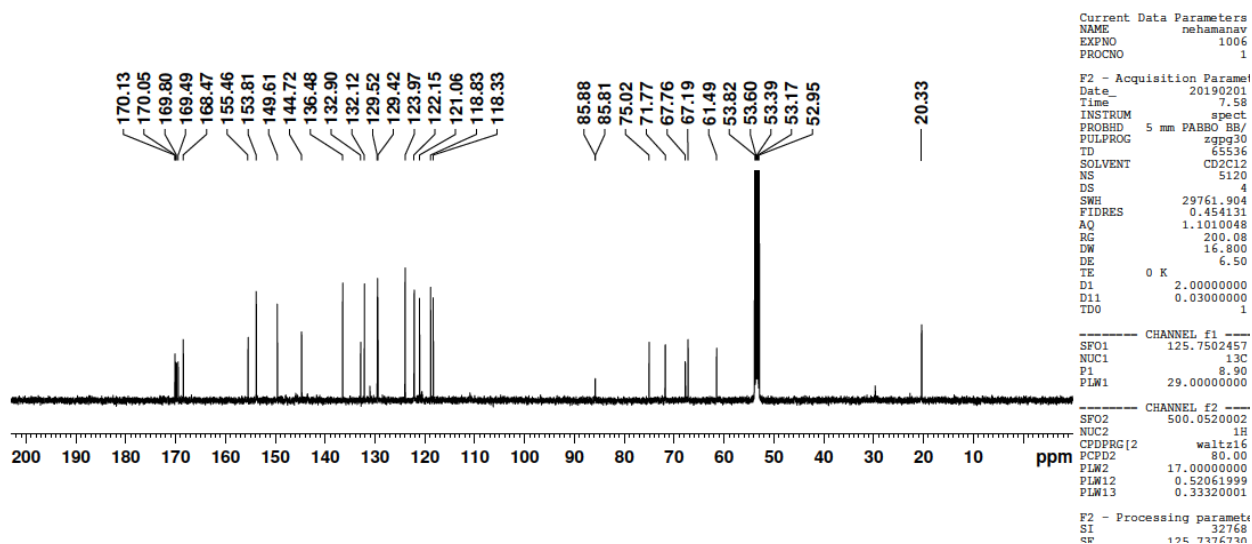

Figure S22 <sup>13</sup>C NMR of compound Ir6 in CD<sub>2</sub>Cl<sub>2</sub>.

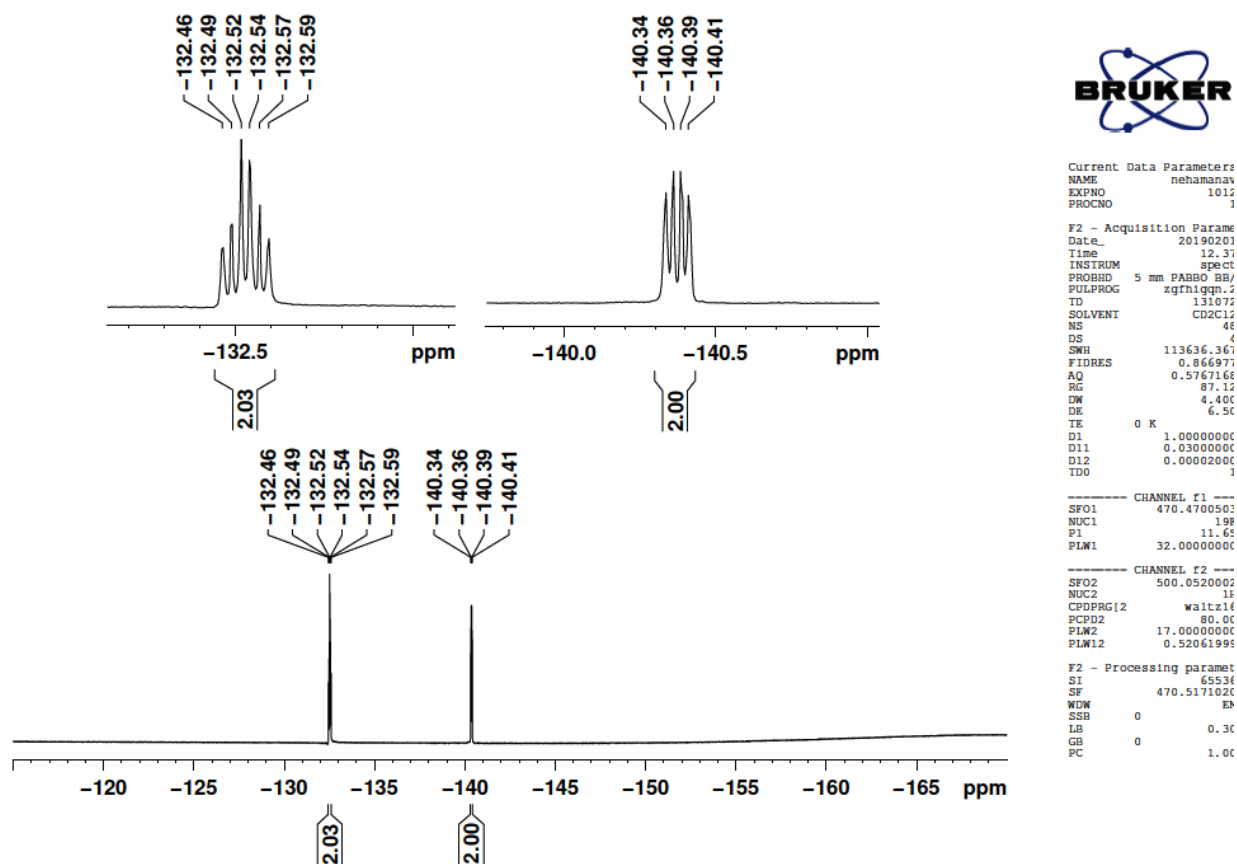

Figure S23 <sup>19</sup>F NMR of compound Ir6 in CD<sub>2</sub>Cl<sub>2</sub>.

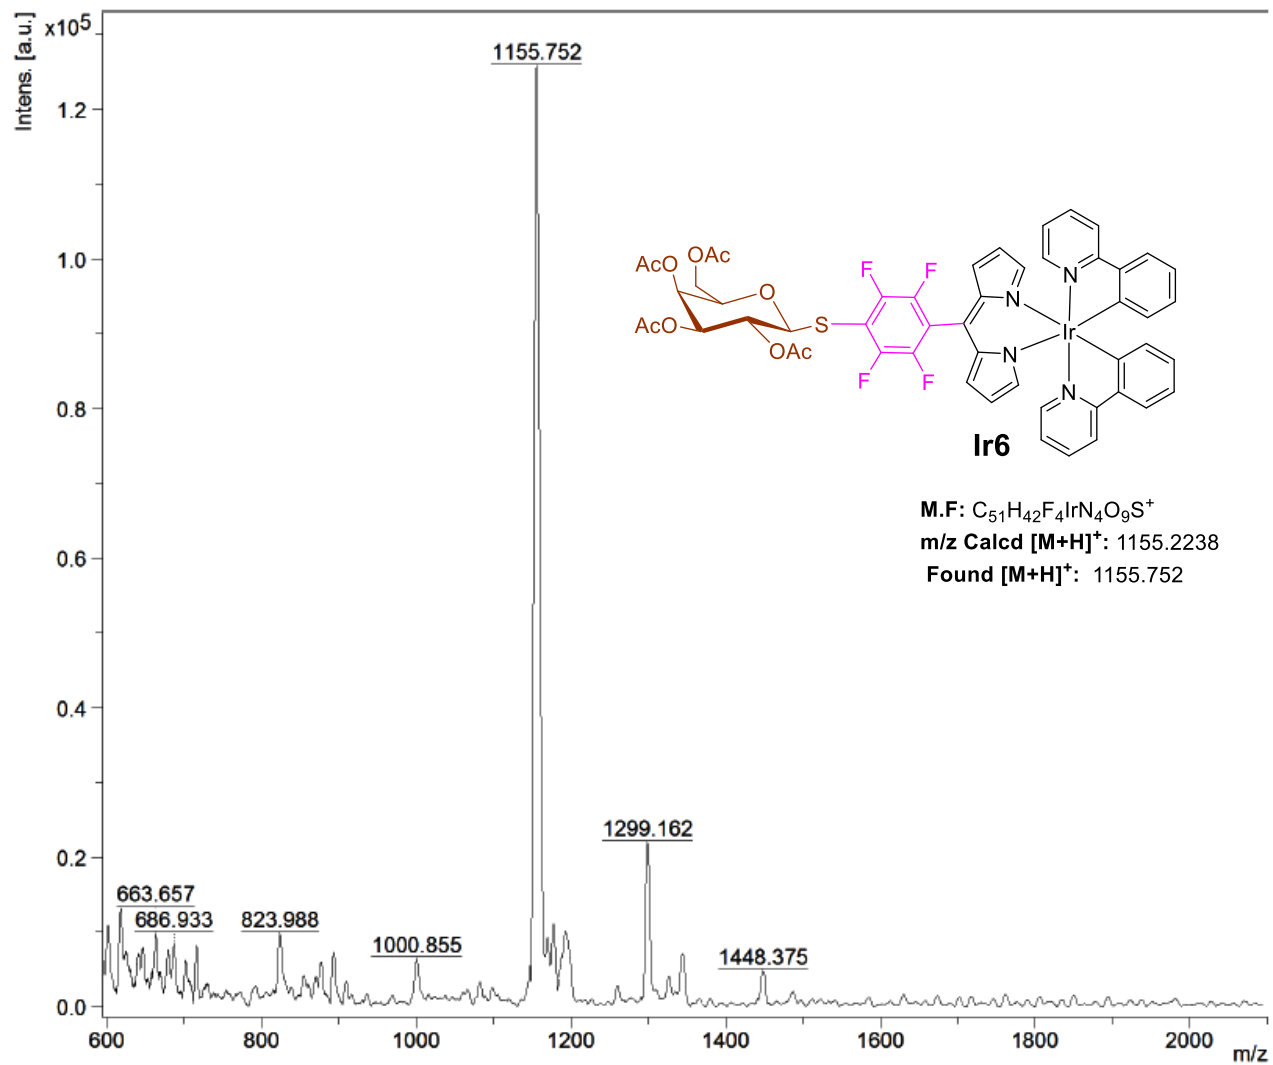

Figure S24 MALDI-MS of compound **Ir6**.

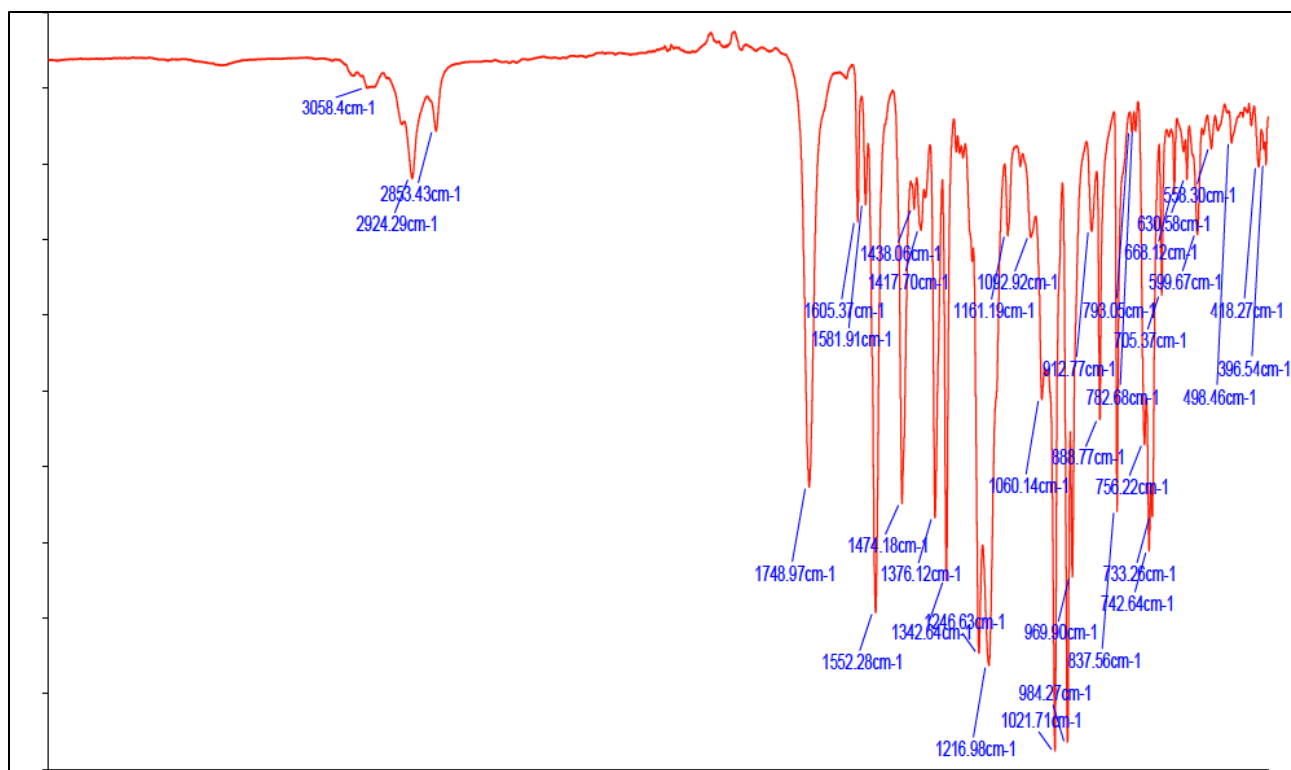

Figure S25 IR spectrum of compound **Ir7**.

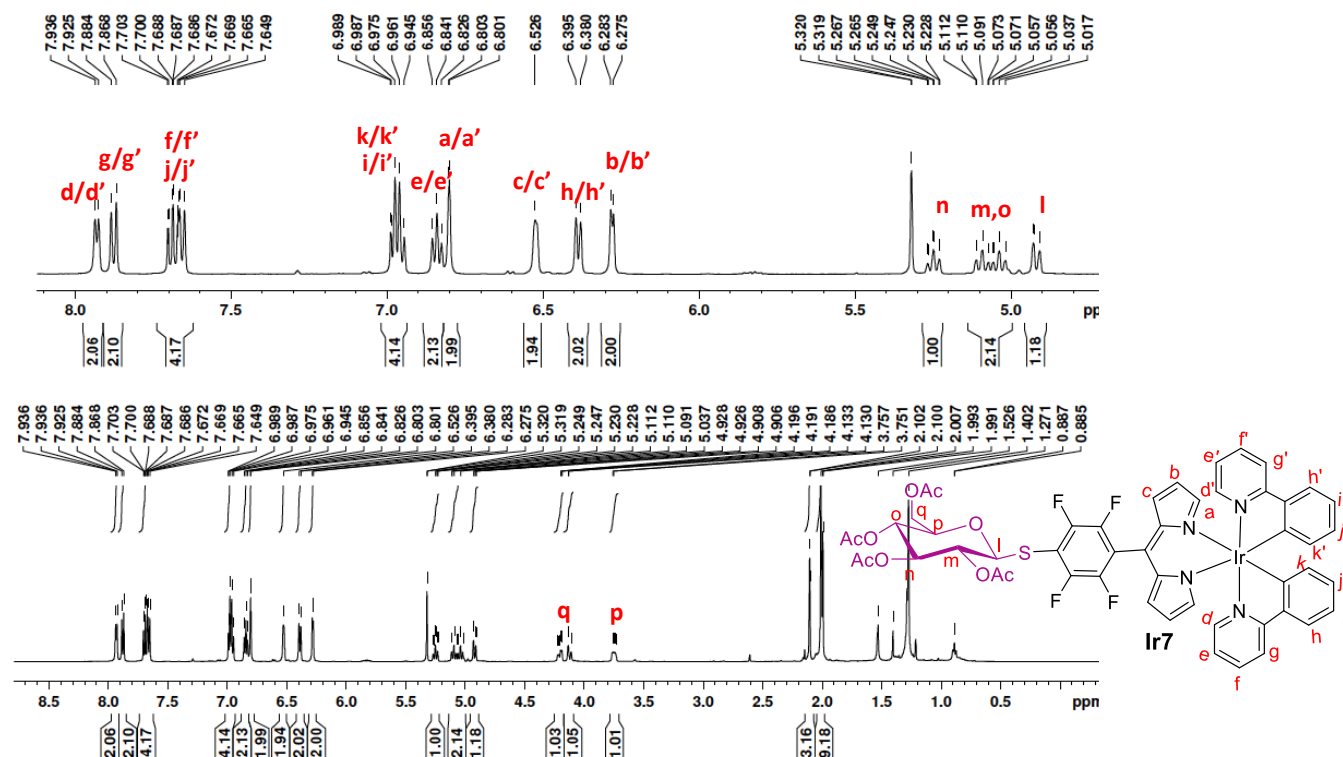

Figure S26  $^1\text{H}$  NMR of compound **Ir7** in  $\text{CD}_2\text{Cl}_2$ .

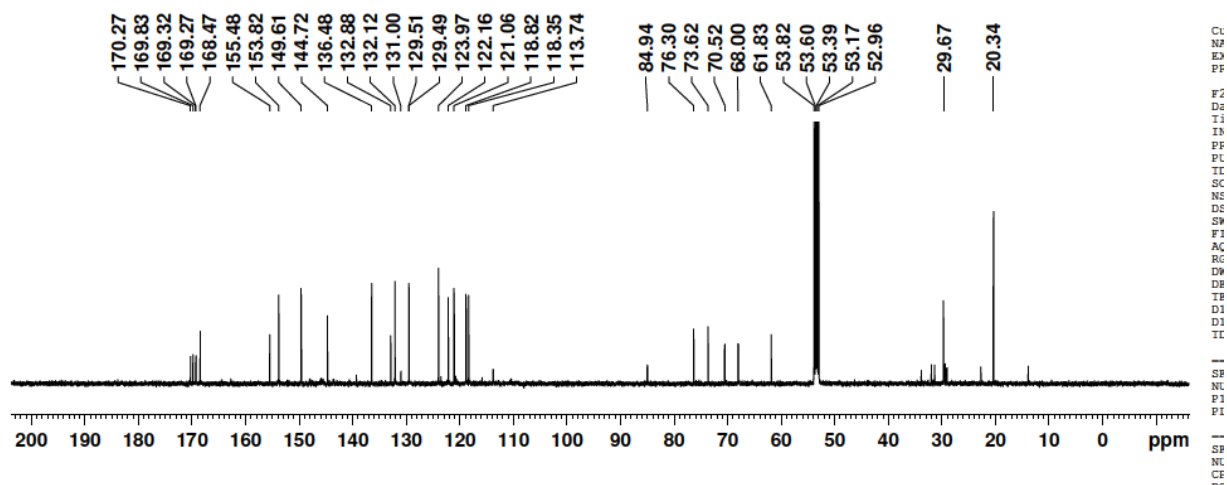

Figure S27  $^{13}\text{C}$  NMR of compound **Ir7** in  $\text{CD}_2\text{Cl}_2$ .

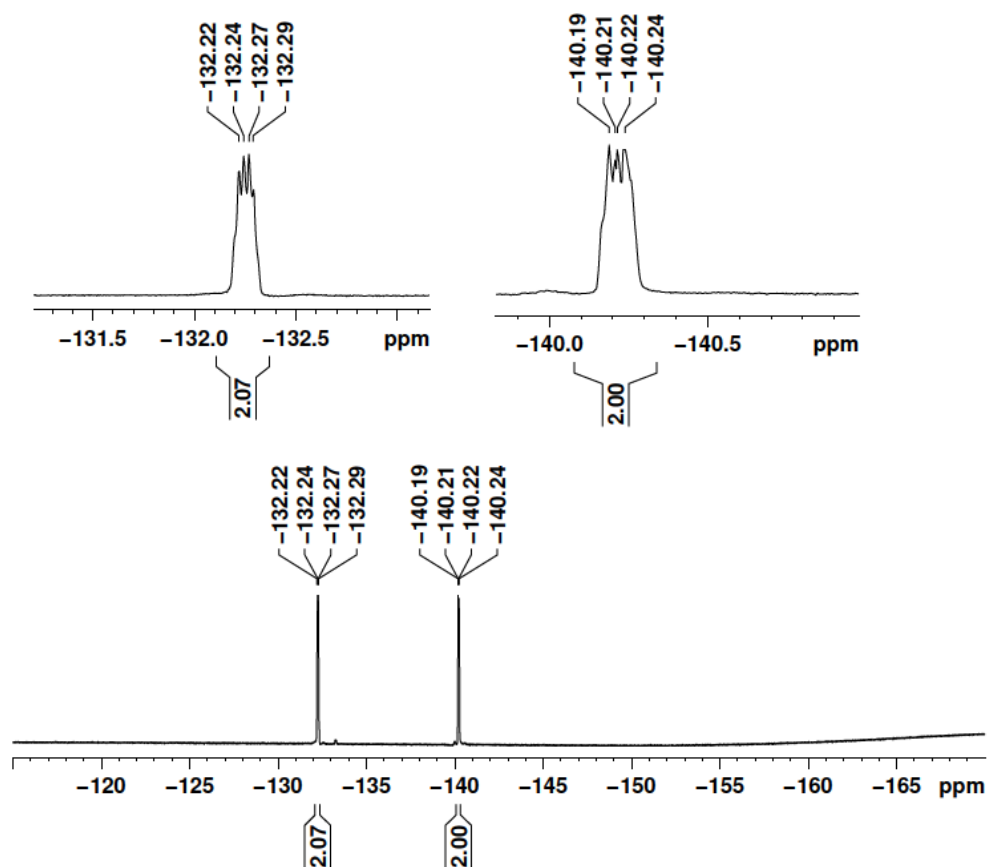

Figure S28  $^{19}\text{F}$  NMR of compound **Ir7** in  $\text{CD}_2\text{Cl}_2$ .

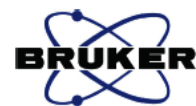

```

Current Data Parameters
NAME      nehamaev
EXPNO     1011
PROCNO    1

F2 - Acquisition Parameters
Date_     20190201
Time      12.30
INSTRUM   spect
PROBHD    5 mm PABBO BB/
PULPROG   zgpg30m.2
TD         131072
SOLVENT   CD2Cl2
NS         48
DS         4
SWH        113636.367
FIDRES     0.866977
AQ          0.5767168
RG          99.08
DW          4.480
DE          6.50
TE          0 K
D1          1.00000000
D11         0.03000000
D12         0.00020000
TDO         1

===== CHANNEL f1 =====
SFO1      470.4700503
NUC1       19F
P1         11.65
PIW1      32.00000000

===== CHANNEL f2 =====
SFO2      500.0520002
NUC2       1H
CPDPRG12  waltz16
PCPD2     80.00
PIW2      17.00000000
PIW12     0.52061999

F2 - Processing parameters
SI         65536
SF         470.5171020
WDW        EM
SSB        0
LB         0.30
GB         0
PC         1.00

```

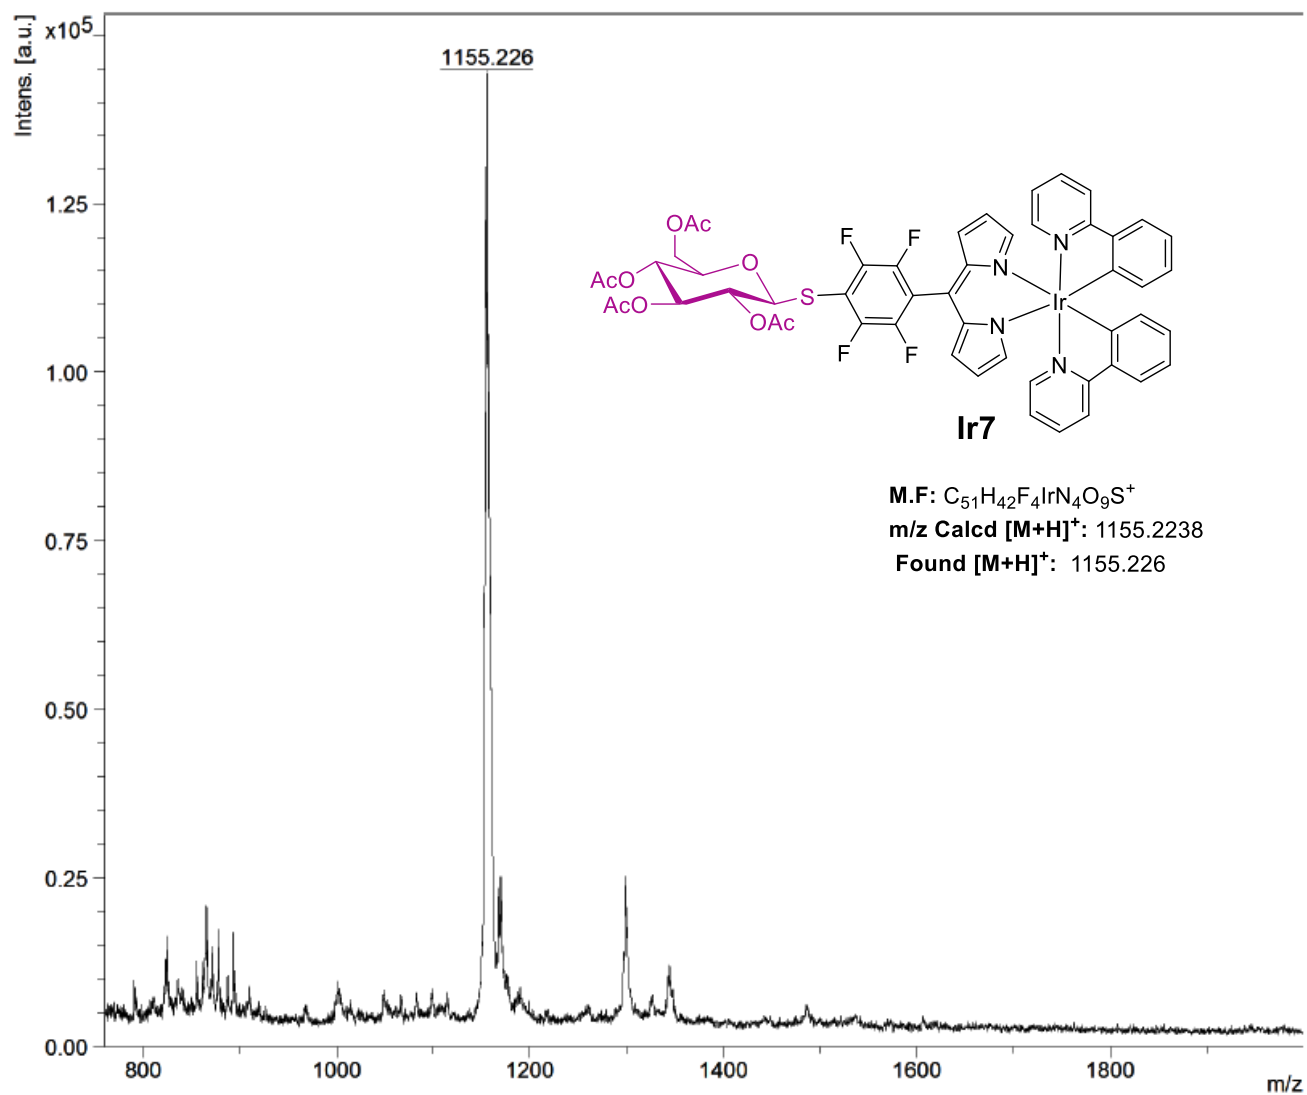

Figure S29 MALDI-MS of compound Ir7.

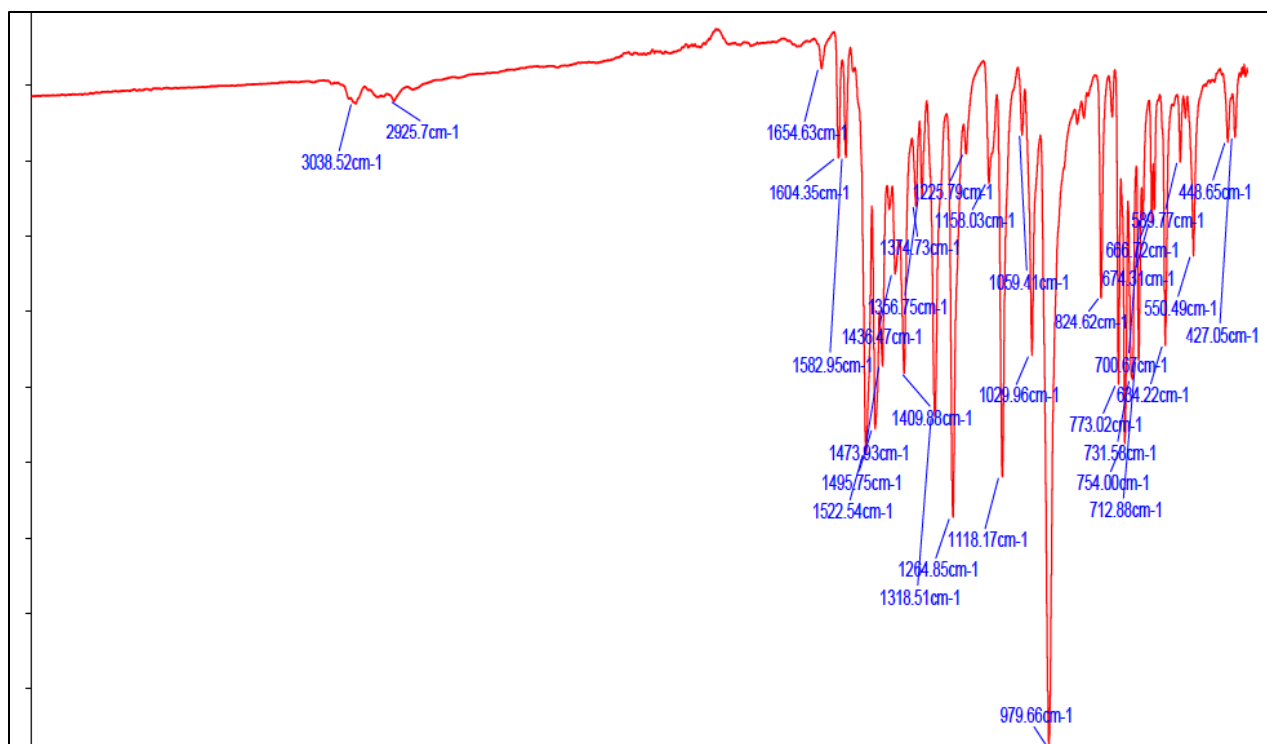

Figure S30 IR spectrum of compound Ir8.

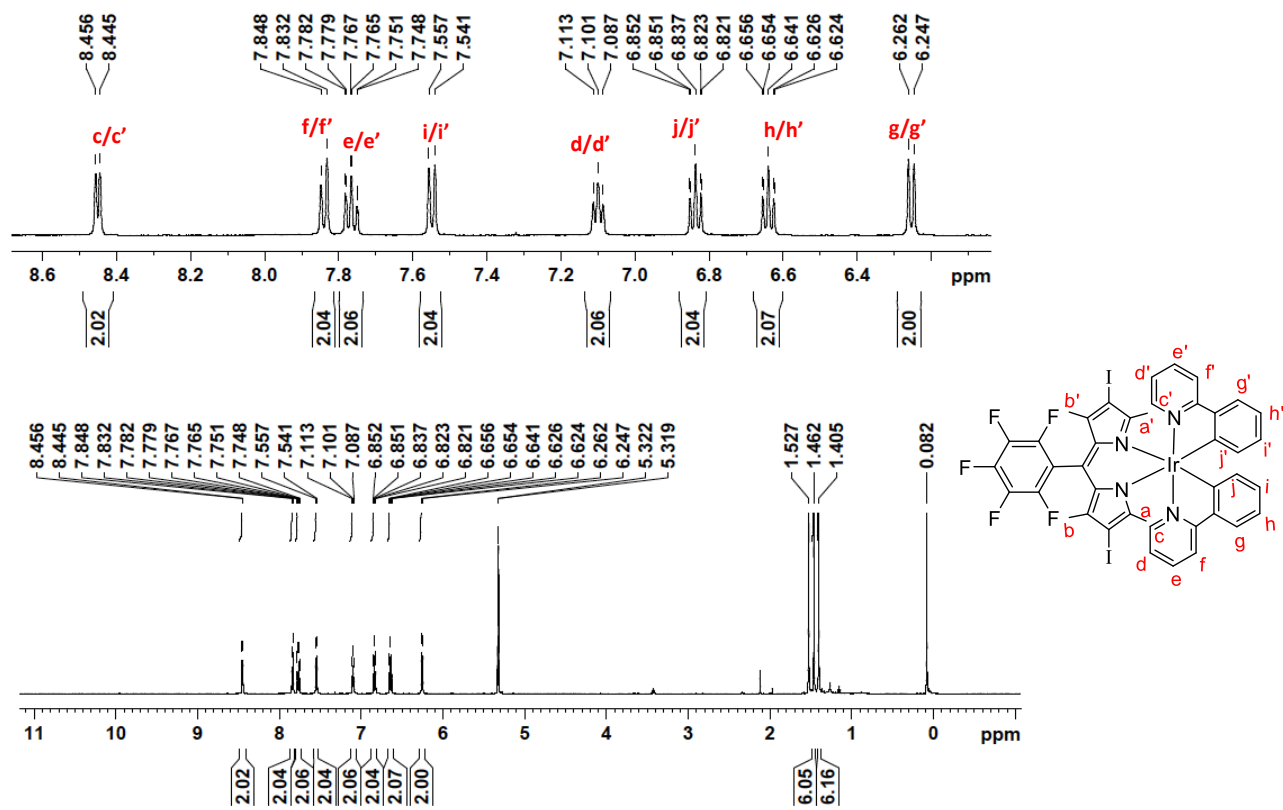

Figure S31 <sup>1</sup>H NMR of compound Ir8 in CD<sub>2</sub>Cl<sub>2</sub>.

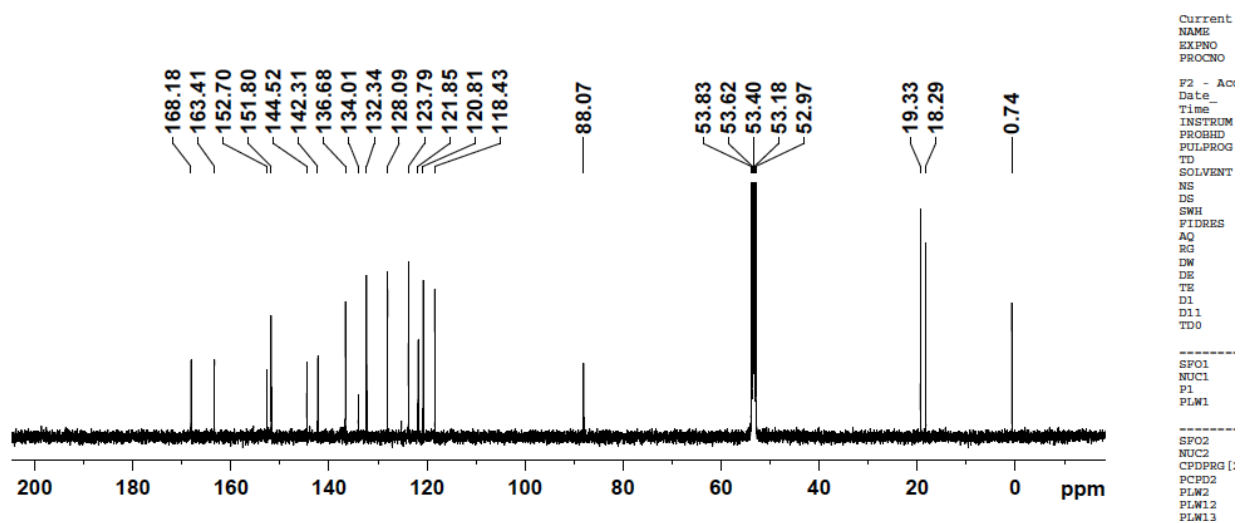

Figure S32  $^{13}\text{C}$  NMR of compound **Ir8** in  $\text{CD}_2\text{Cl}_2$ .

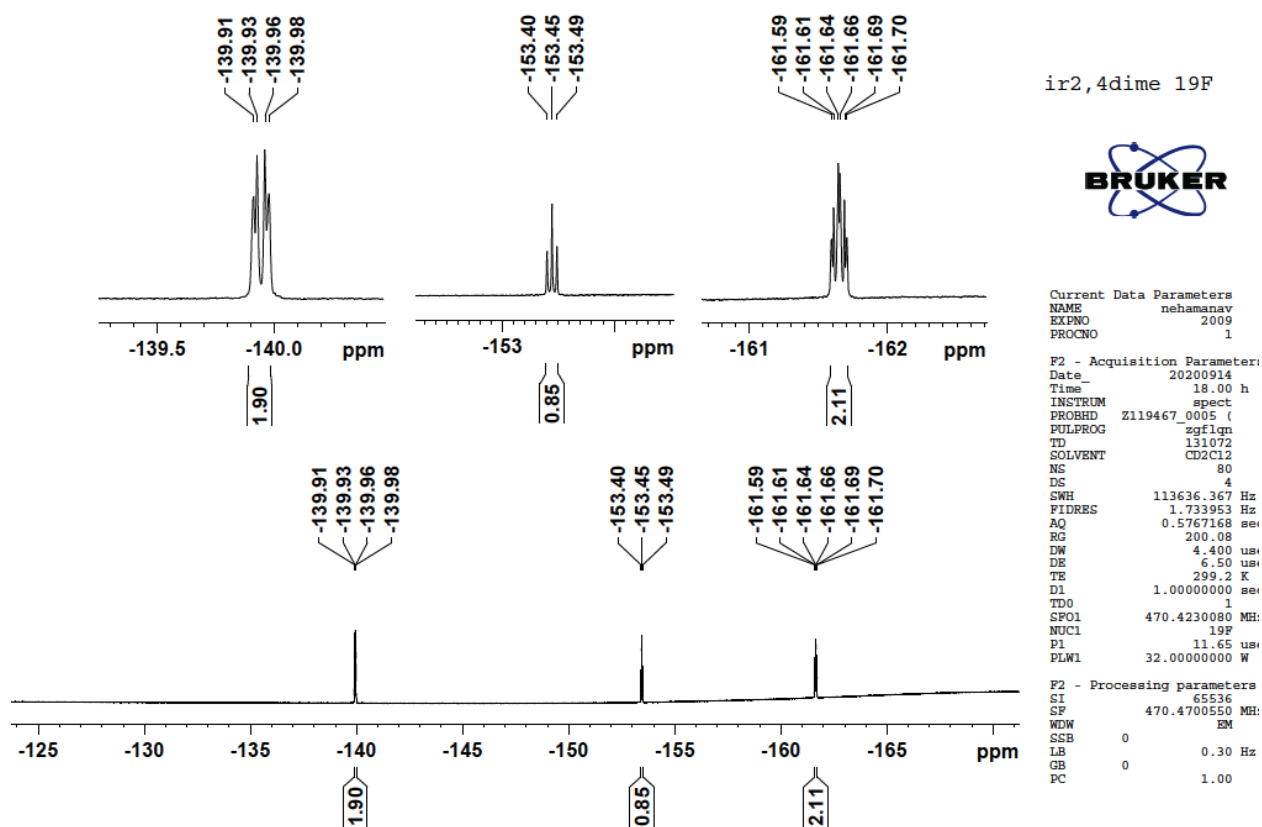

Figure S33  $^{19}\text{F}$  NMR of compound **Ir8** in  $\text{CD}_2\text{Cl}_2$ .



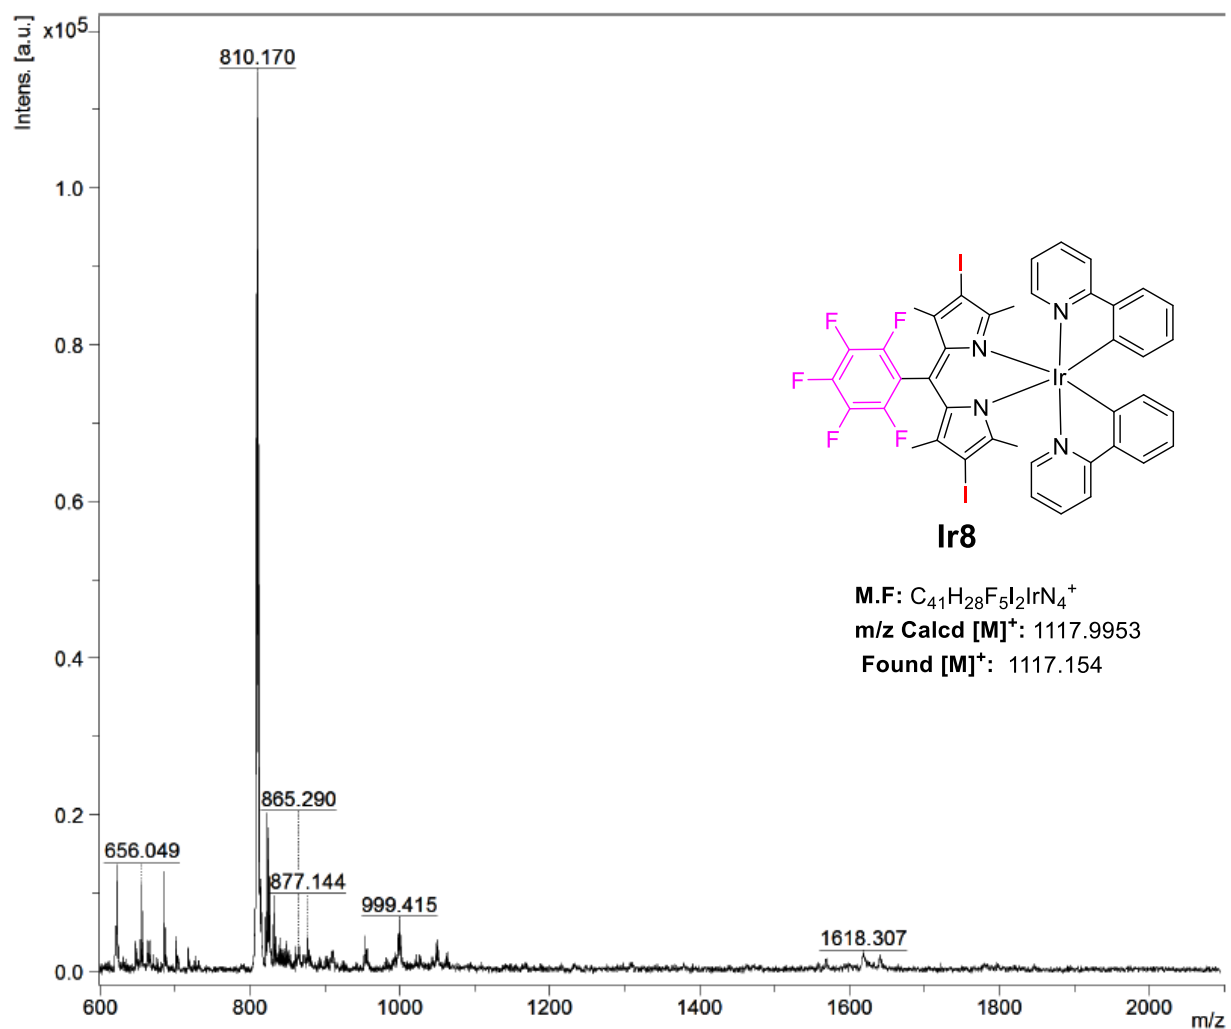

Figure S34 MALDI-MS of compound Ir8.

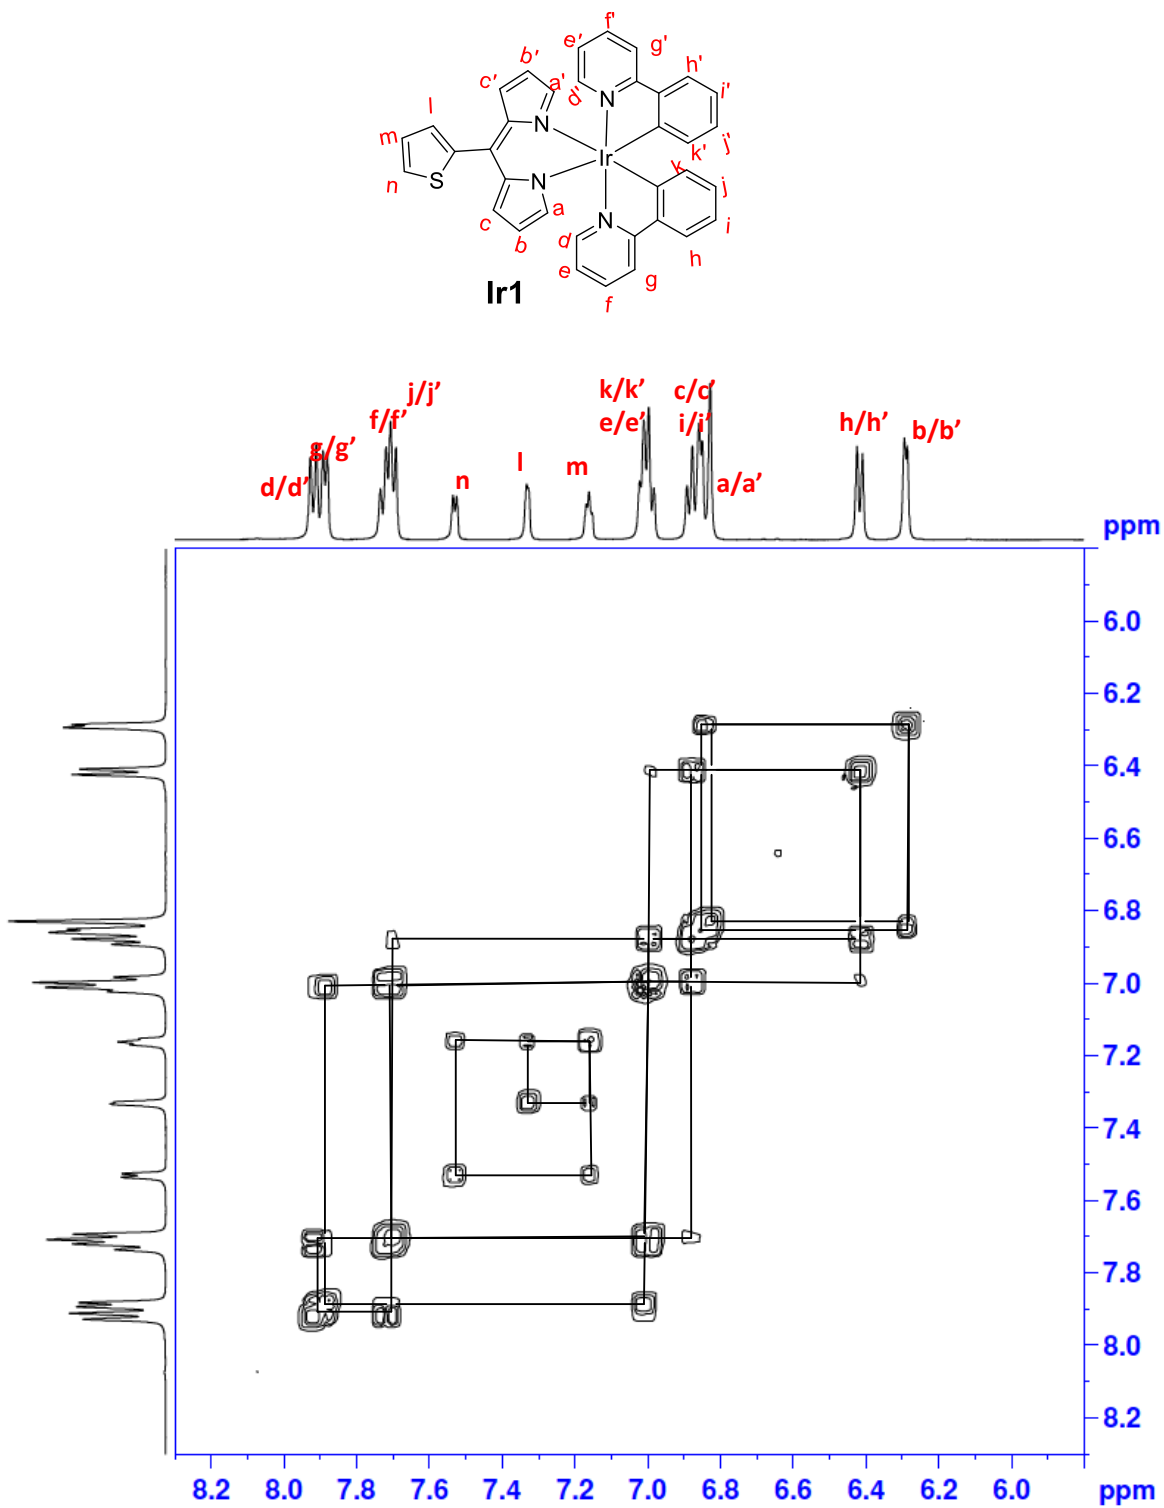

Figure S35  $^1\text{H}$ - $^1\text{H}$  COSY of compound **Ir1** in  $\text{CD}_2\text{Cl}_2$ .

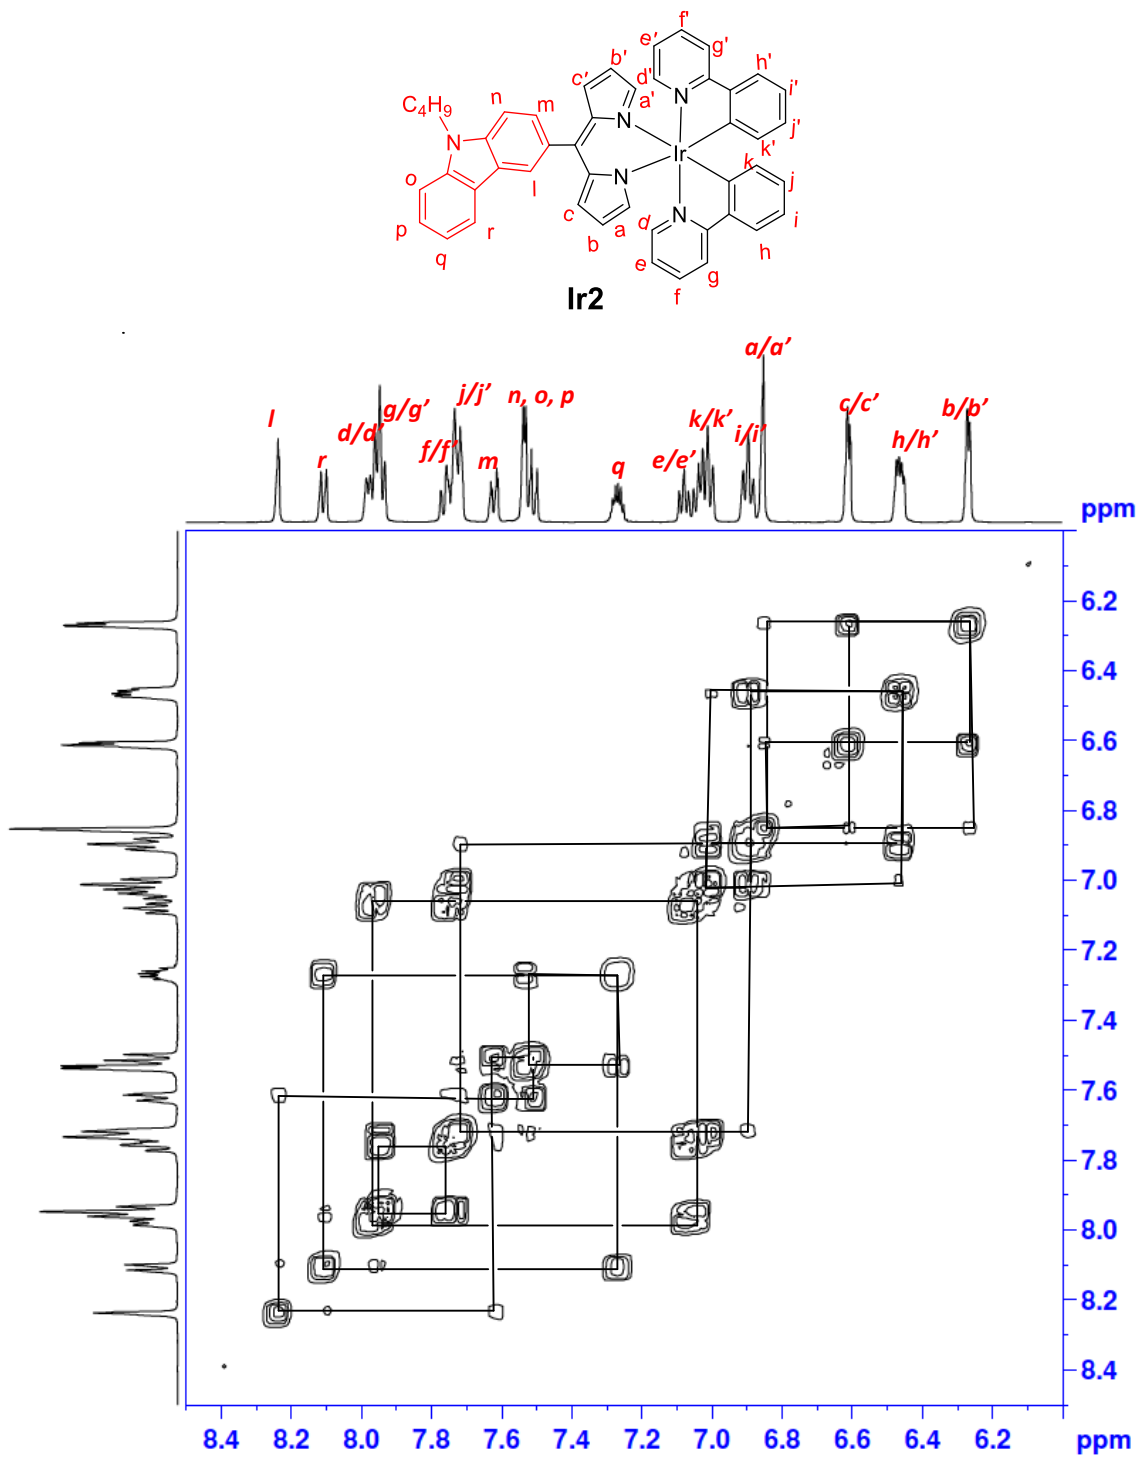

**Figure S36**  $^1\text{H}$ - $^1\text{H}$  COSY of compound **Ir2** in  $\text{CD}_2\text{Cl}_2$ .

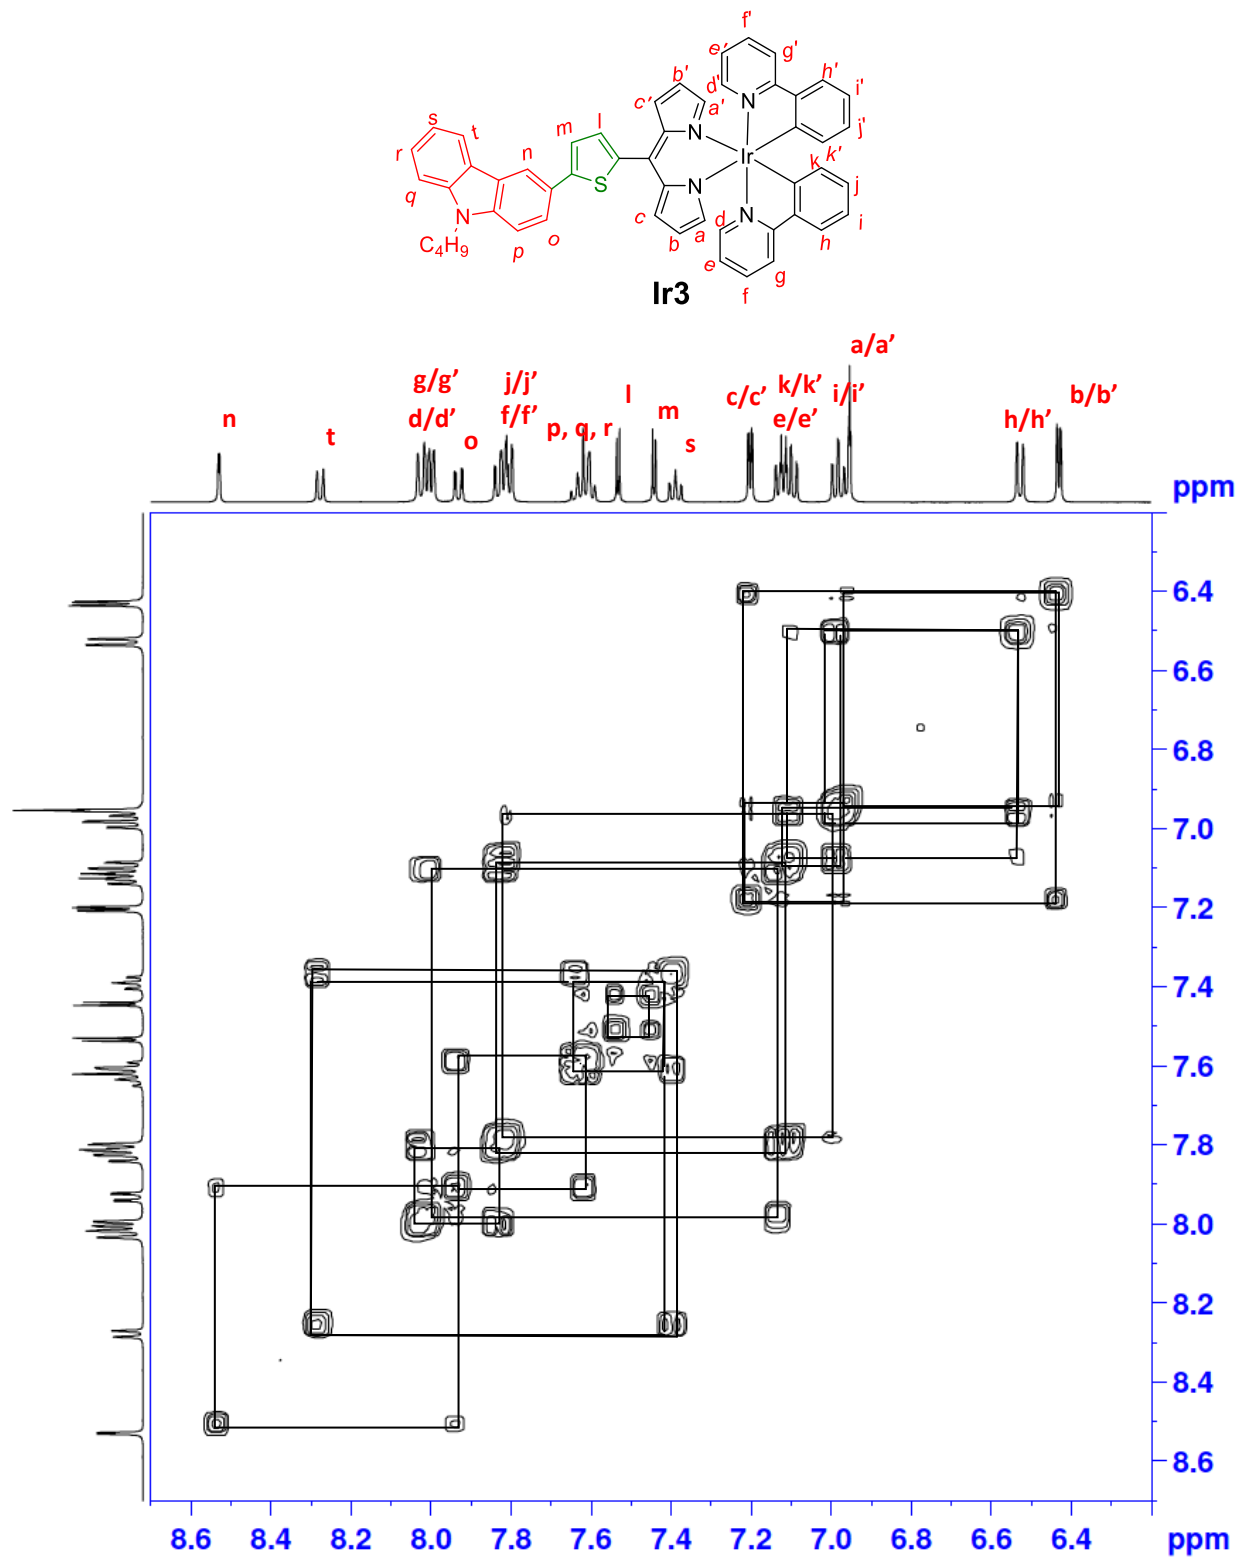

Figure S37  $^1\text{H}$ - $^1\text{H}$  COSY of compound **Ir3** in  $\text{CD}_2\text{Cl}_2$ .

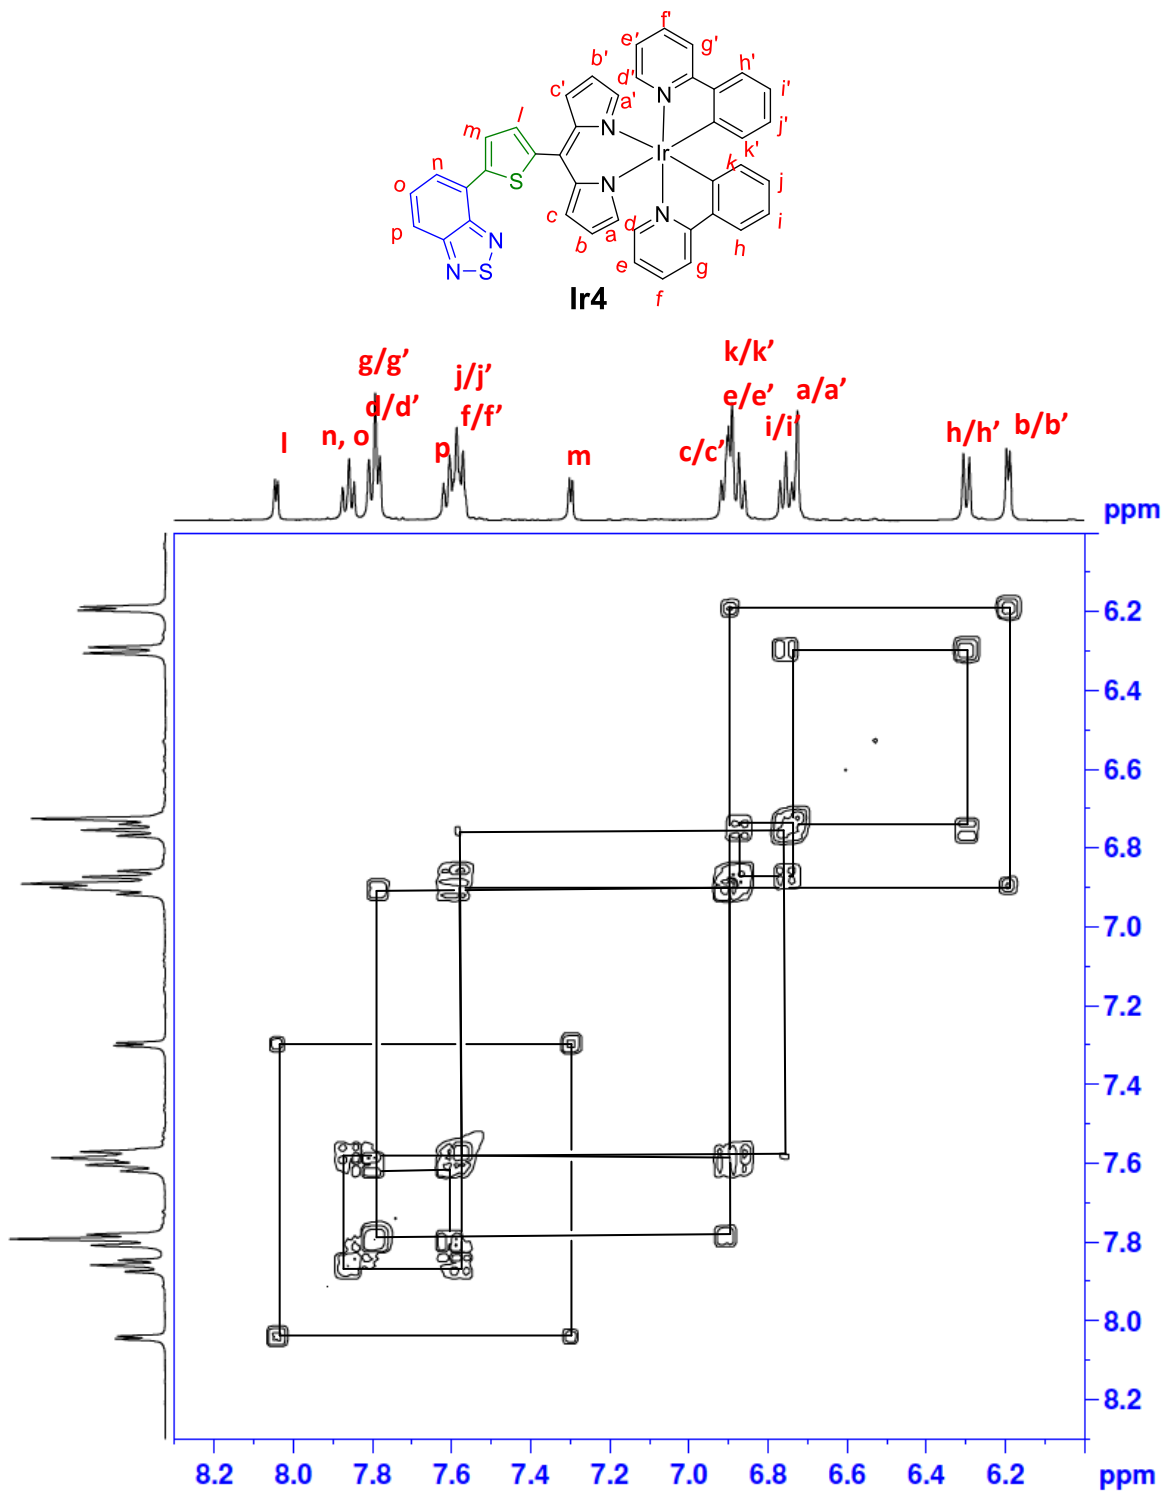

Figure S38  $^1\text{H}$ - $^1\text{H}$  COSY of compound **Ir4** in  $\text{CD}_2\text{Cl}_2$ .

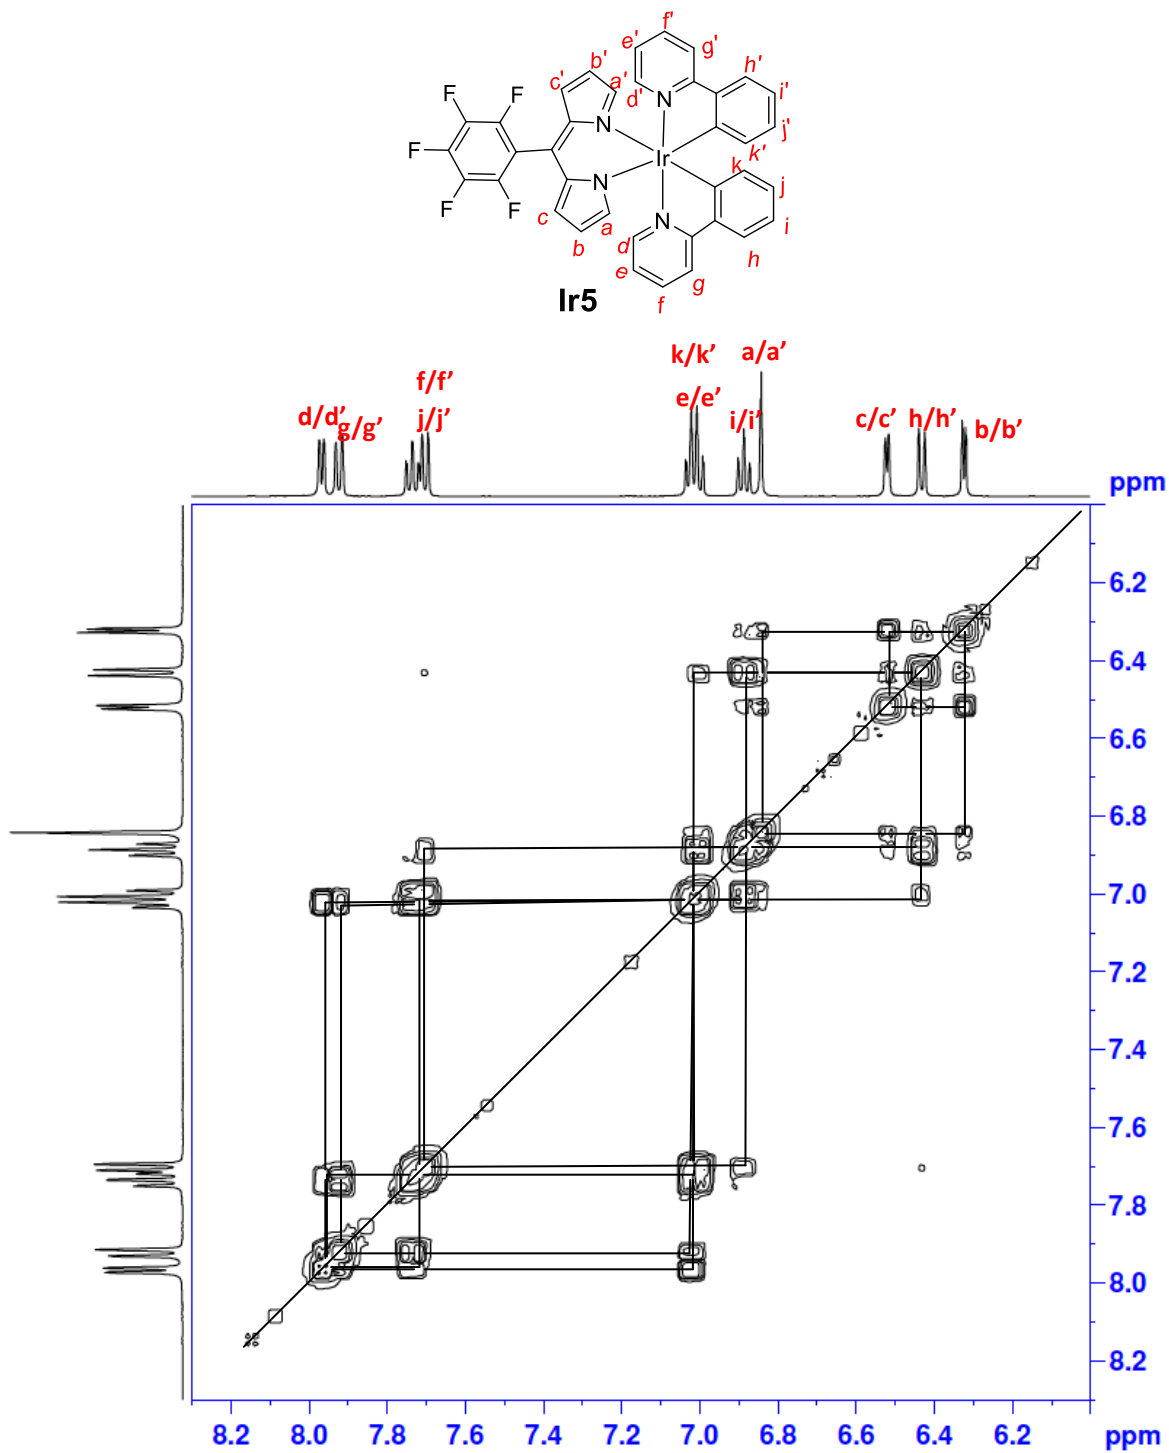

Figure S39  $^1\text{H}$ - $^1\text{H}$  COSY of compound **Ir5** in  $\text{CD}_2\text{Cl}_2$ .

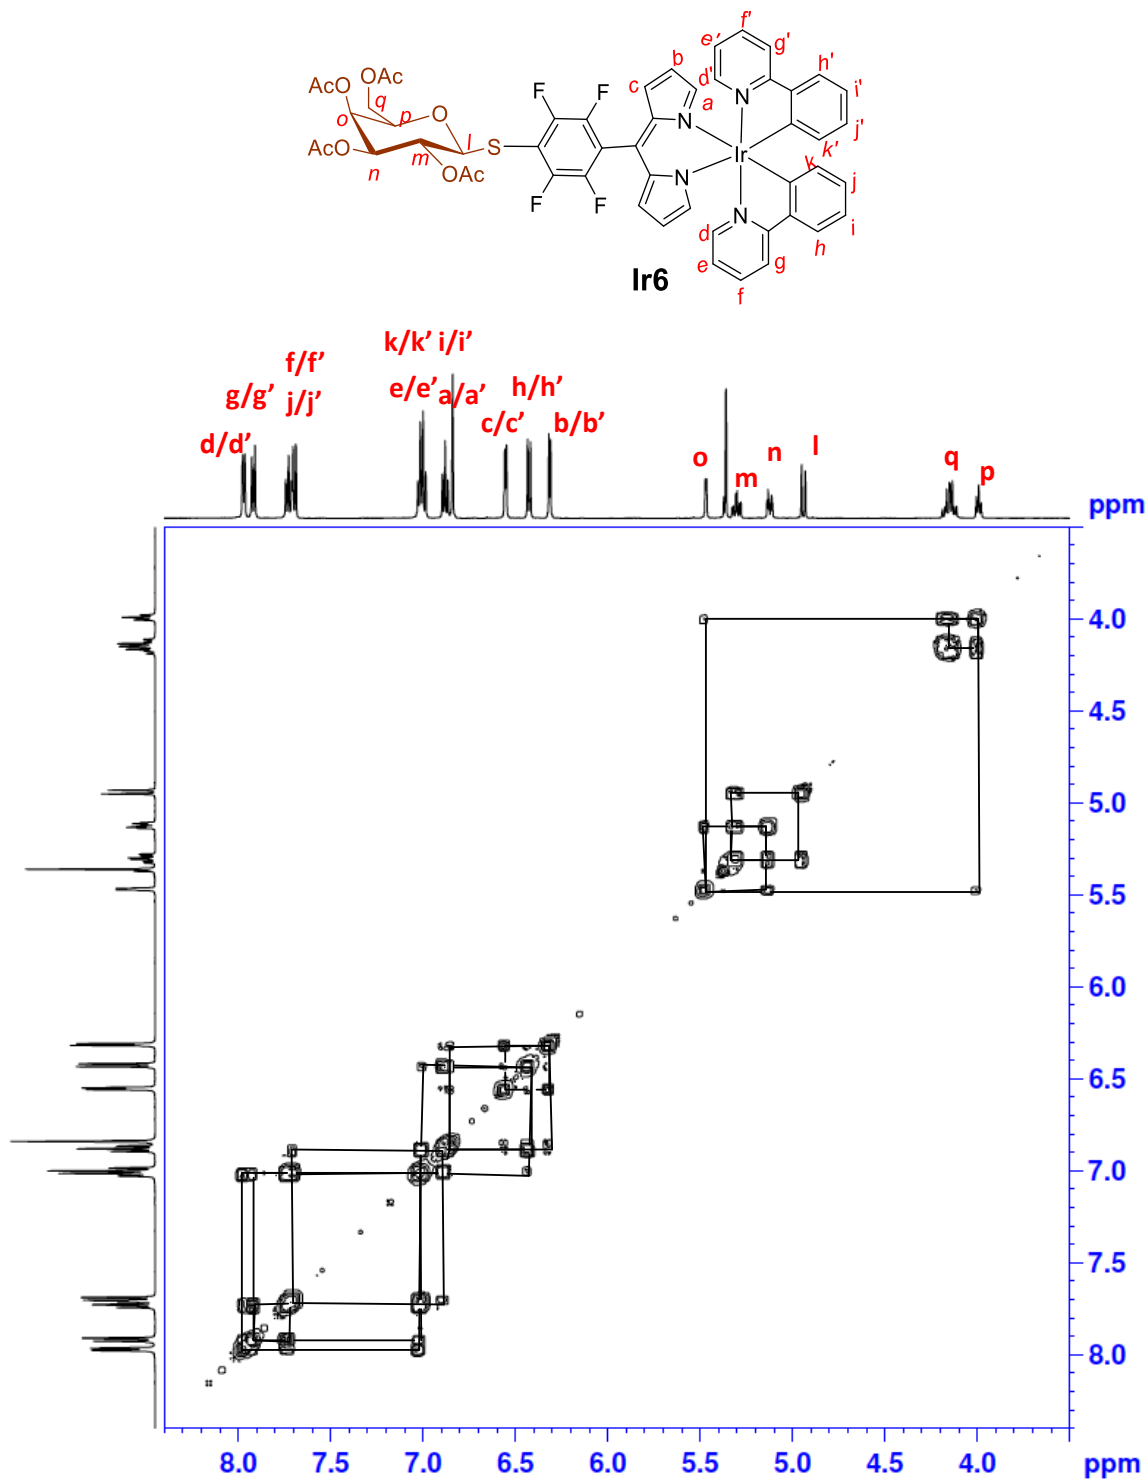

**Figure S40**  $^1\text{H}$ - $^1\text{H}$  COSY of compound **Ir6** in  $\text{CD}_2\text{Cl}_2$ .

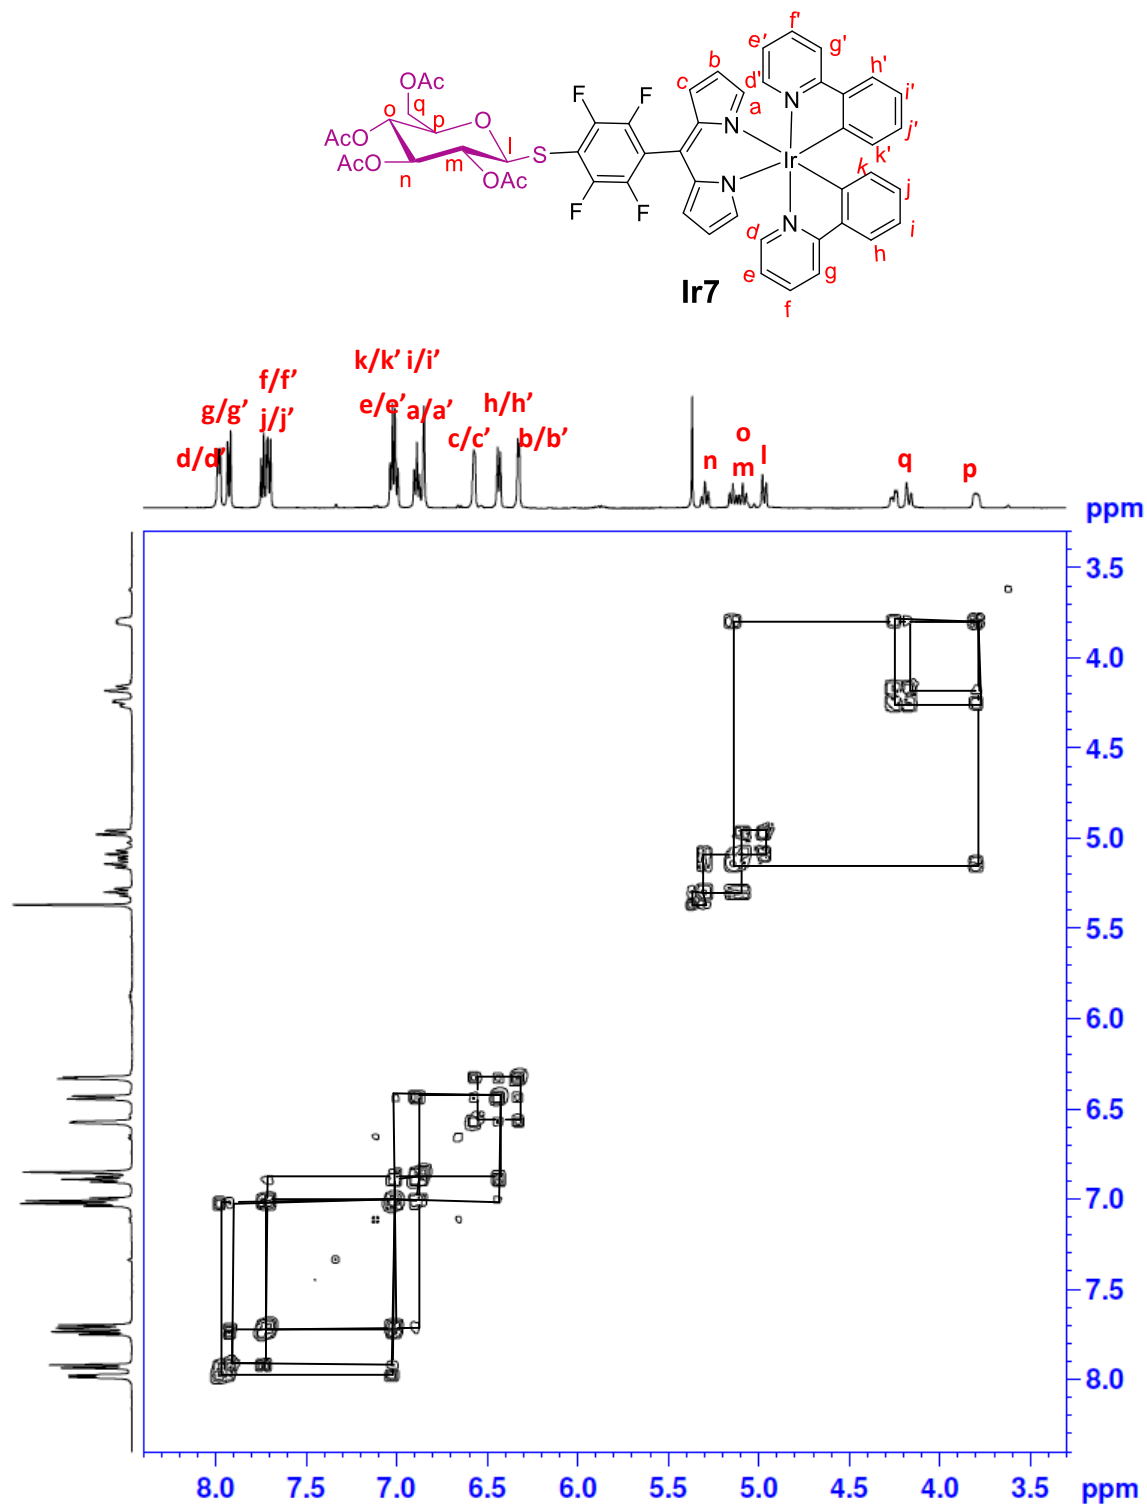

**Figure S41**  $^1\text{H}$ - $^1\text{H}$  COSY of compound **Ir7** in  $\text{CD}_2\text{Cl}_2$ .



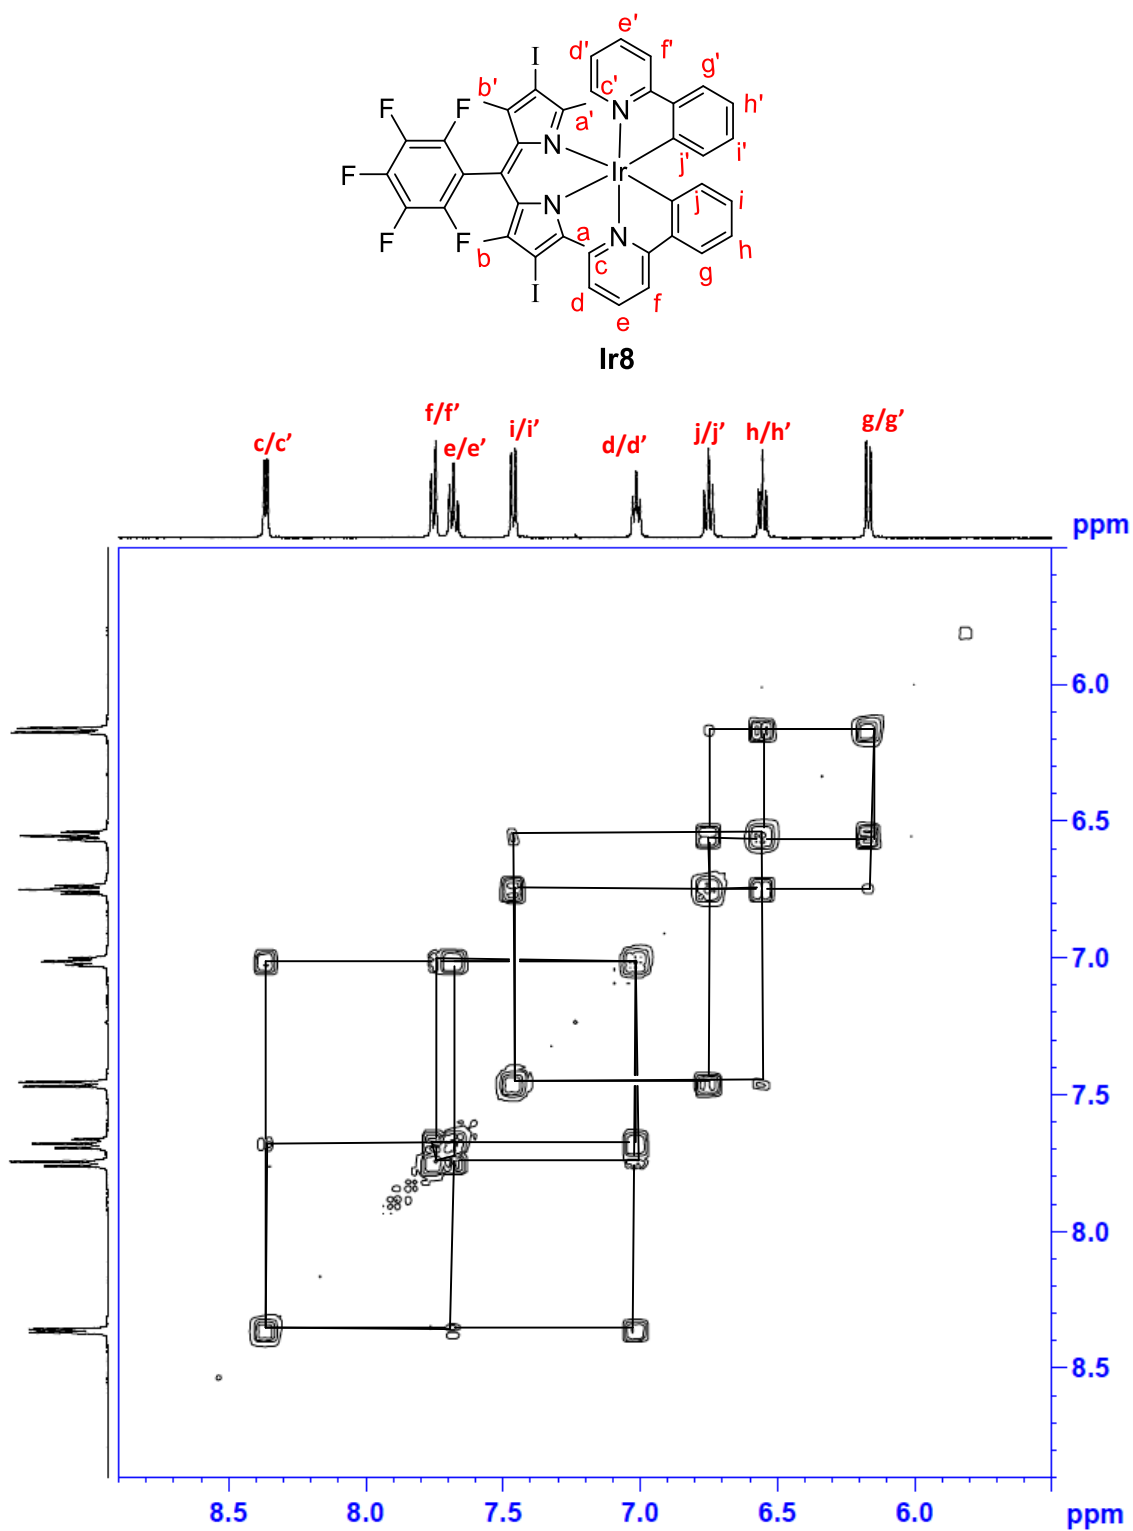

**Figure S42**  $^1\text{H}$ - $^1\text{H}$  COSY of compound **Ir8** in  $\text{CD}_2\text{Cl}_2$ .

## Singlet oxygen ( $^1\text{O}_2$ ) quantum yield

Singlet oxygen generation quantum yields for iridium complexes (**Ir5-Ir7**) were calculated in DMSO and  $\text{CHCl}_3$  solvents by using modified method<sup>[1,2]</sup> where 1,3-diphenylisobenzofuran (DPBF) was used as scavenger and Rose Bengal as standard/reference compound. All solutions were prepared in dark and saturated with oxygen. The samples containing iridium complex and DPBF were irradiated at 488 nm using OBIS Laser 488 (15 mW). The samples containing Rose Bengal and DPBF were irradiated at 532 nm using Oxxius Laser 532 (15 mW), white LED (3W). The DPBF absorbance was adjusted to 1.0 at 420 nm using 60  $\mu\text{M}$  concentration and iridium complexes absorbance were adjusted to 0.2 at irradiation wavelength (488 nm). The concentration used for **Ir6** and **Ir7** is 8  $\mu\text{M}$  in both solvents; while for **Ir5** it is 8  $\mu\text{M}$  in DMSO and 6  $\mu\text{M}$  in  $\text{CHCl}_3$ . Similarly absorbance for Rose Bengal was also adjusted to 0.2 at irradiation wavelength (532 nm) in DMSO. Since, Rose Bengal is poorly soluble in  $\text{CHCl}_3$  hence Rose Bengal in DMSO solvent used as standard/reference.<sup>[3]</sup>

The photo-oxidation of DPBF sensitized by **Ir5-Ir7** was monitored by UV-vis spectrometer at various intervals and the obtained slope from absorption values at 420 nm were then used in below equation to calculate the singlet oxygen quantum yield.

The method is relative method<sup>[4]</sup> using Rose Bengal as a standard/reference.

The values of  $\Phi_\Delta$  of Rose Bengal in water (0.75), DMSO (0.16) and  $\text{CHCl}_3$  (0.76) were used in the following equation.<sup>[5]</sup>

$$\Phi_\Delta(\text{S}) = \Phi_\Delta(\text{S}_0) \times \{ \text{Slope}(\text{S}) / \text{Slope}(\text{S}_0) \},$$

where S is for sample and  $\text{S}_0$  is for standard/reference.

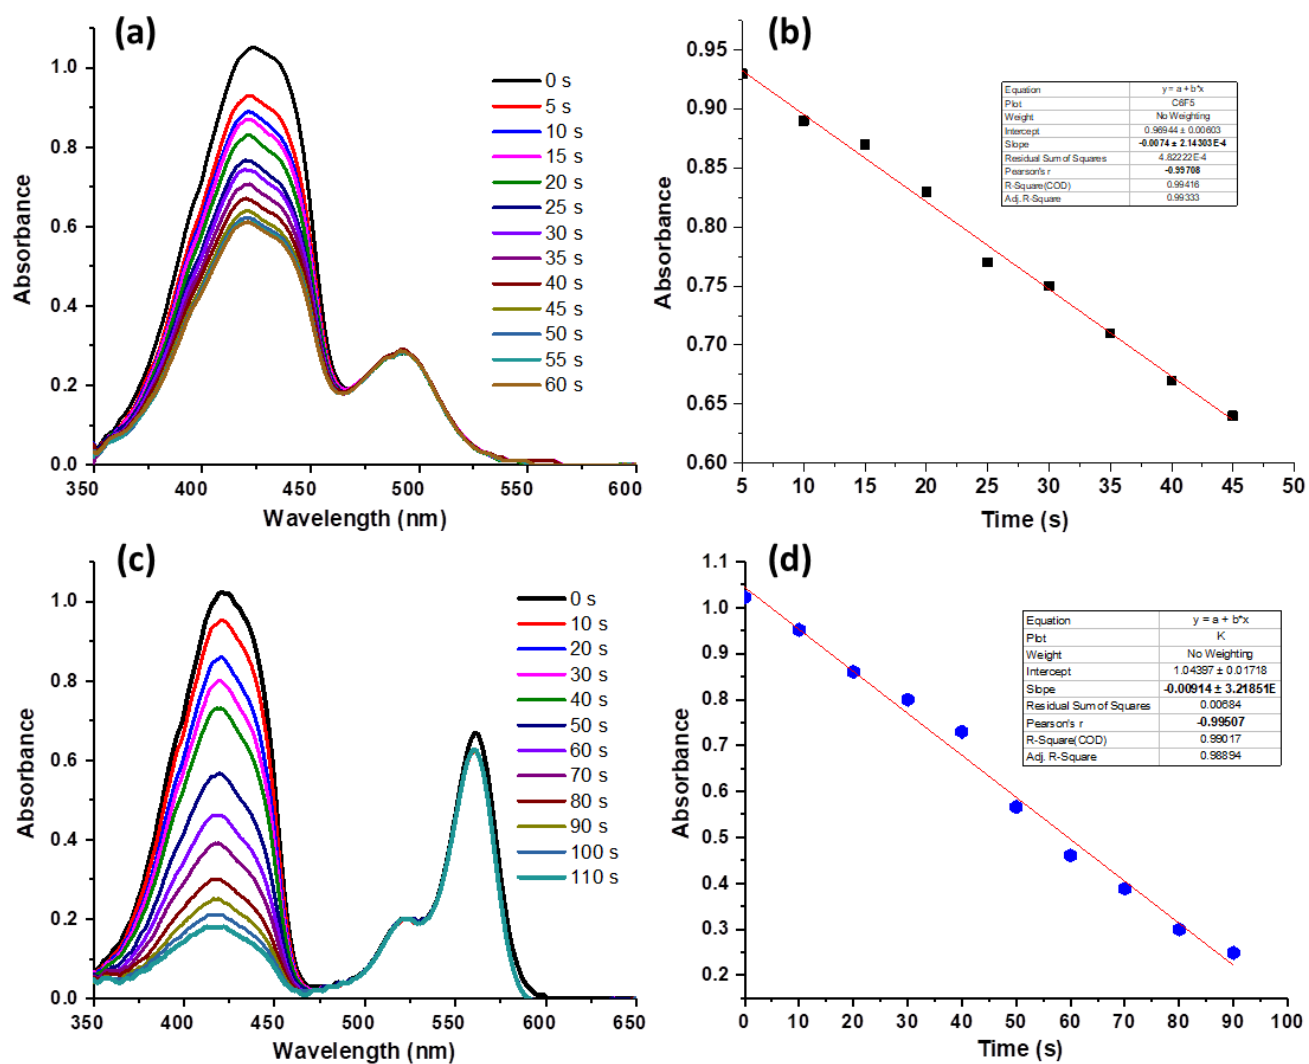

**Figure S43** UV-vis spectral changes in DMSO upon photoirradiation of (a) **Ir5** ( $\lambda = 488$  nm, 15 mW) and (c) Rose Bengal ( $\lambda = 532$  nm, 15 mW); the rate of decrease in absorption measured at 420 nm in (b) **Ir5** and (d) Rose Bengal. The concentration used for DPBF was 60  $\mu\text{M}$ ; Ir7 (8  $\mu\text{M}$ ) and Rose Bengal (8  $\mu\text{M}$ ).

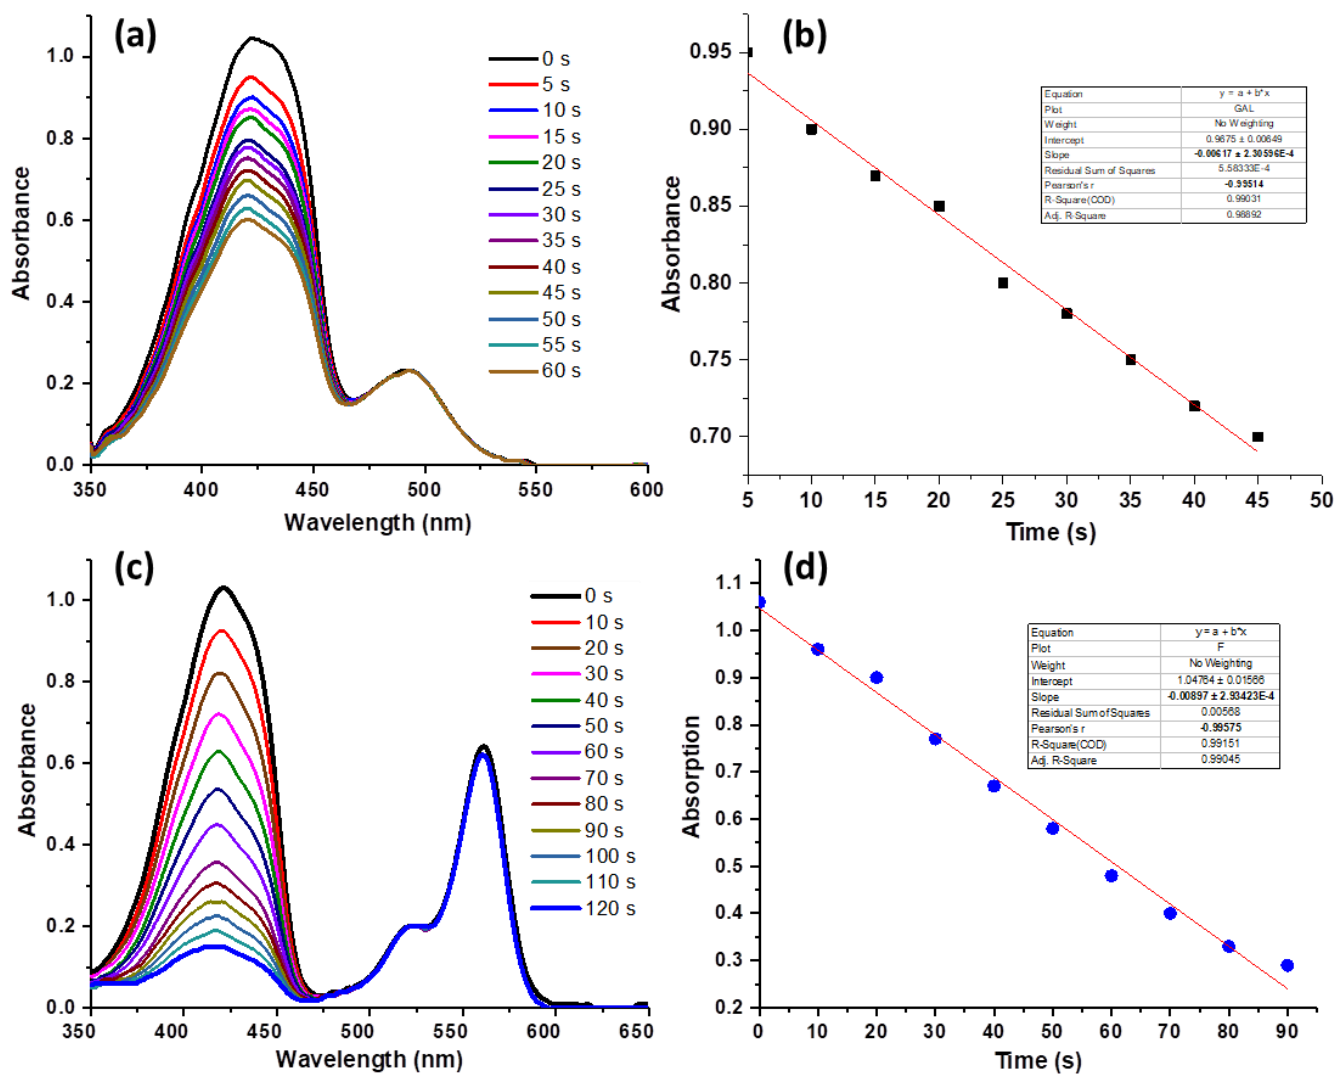

**Figure S44** UV-vis spectral changes in DMSO upon photoirradiation of (a) **Ir6** ( $\lambda = 488$  nm, 15 mW) and (c) Rose Bengal ( $\lambda = 532$  nm, 15 mW); the rate of decrease in absorption measured at 420 nm in (b) **Ir6** and (d) Rose Bengal. The concentration used for DPBF was 60  $\mu$ M; **Ir6** (8  $\mu$ M) and Rose Bengal (8  $\mu$ M).

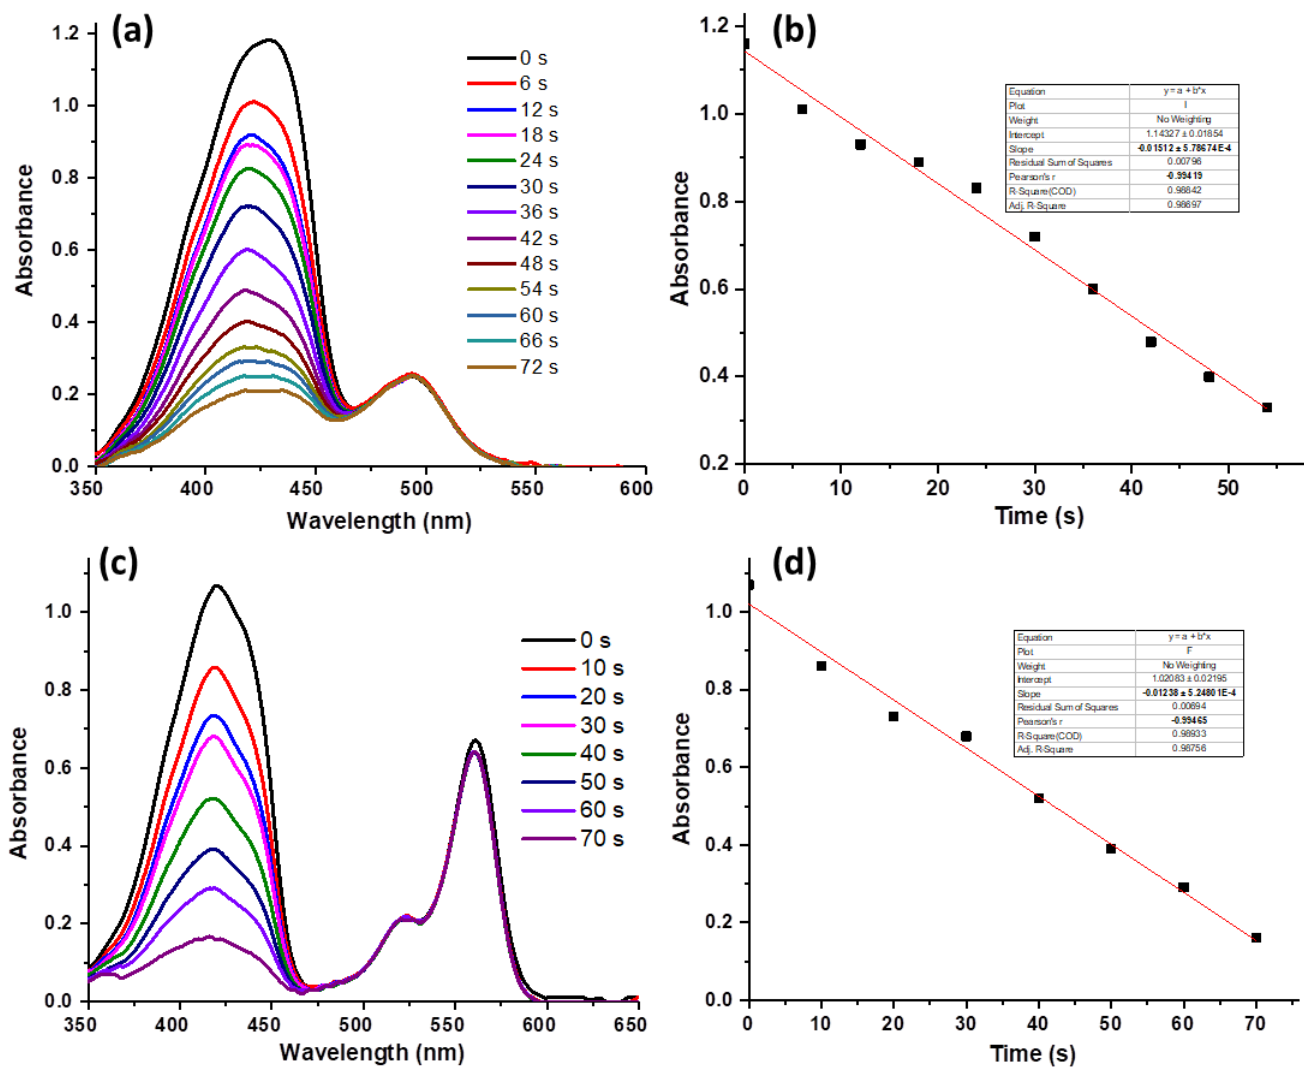

**Figure S45** UV-vis spectral changes upon photoirradiation of (a) **Ir5** in CHCl<sub>3</sub> ( $\lambda = 488$  nm, 15 mW) and (c) Rose Bengal in DMSO ( $\lambda = 532$  nm, 15 mW); the rate of decrease in absorption measured at 420 nm in (b) **Ir5** and (d) Rose Bengal. The concentration used for DPBF was 60  $\mu$ M; **Ir5** (8  $\mu$ M) and Rose Bengal (8  $\mu$ M).

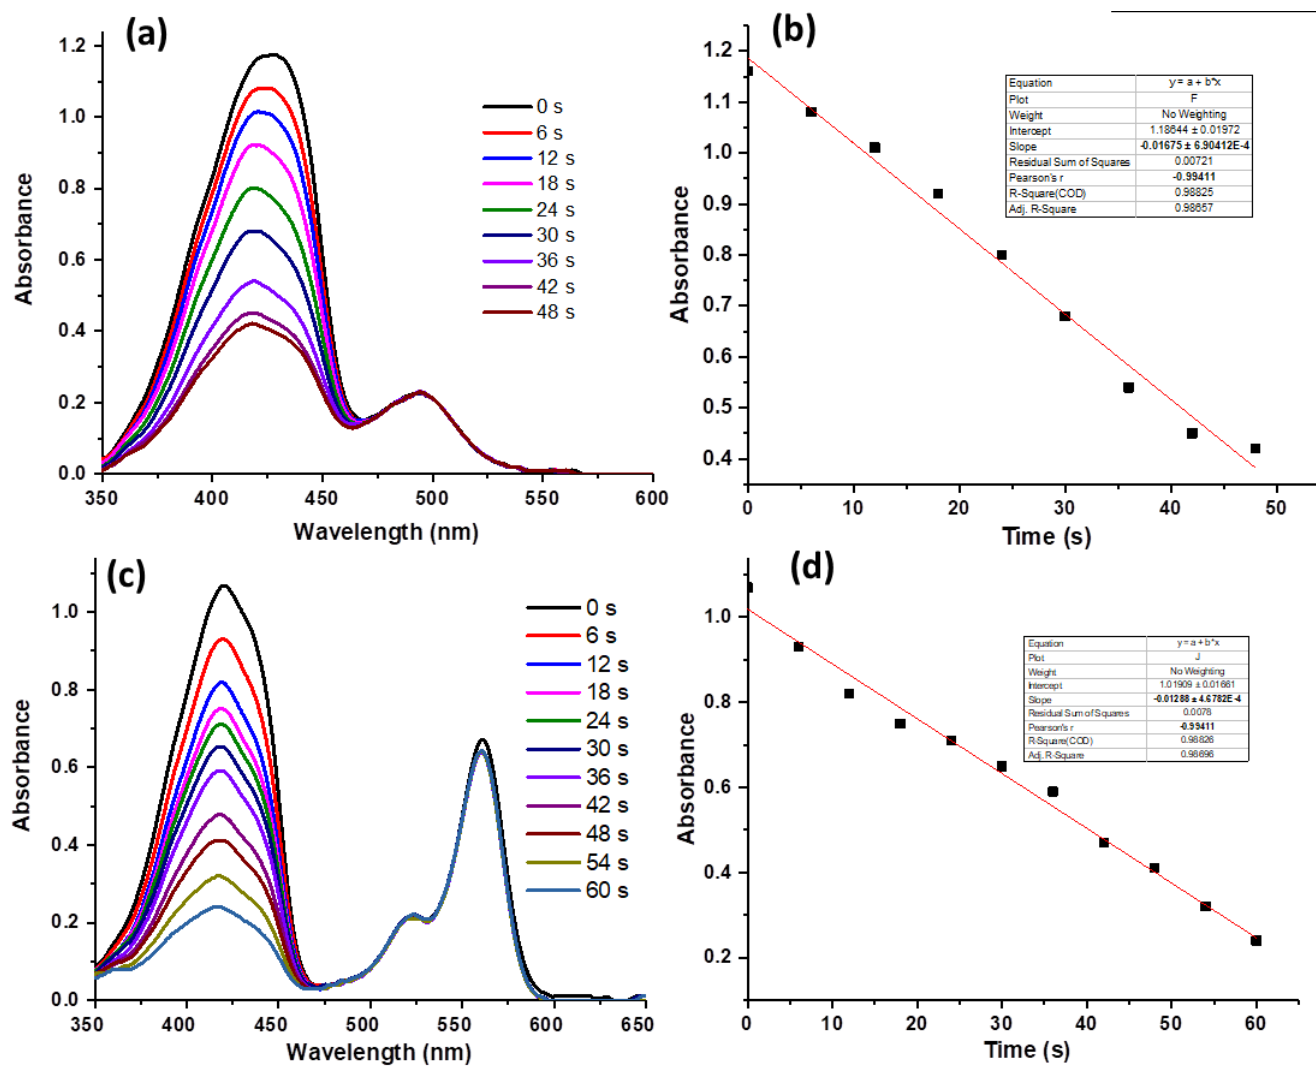

**Figure S46** UV-vis spectral changes upon photoirradiation of (a) **Ir6** in CHCl<sub>3</sub> ( $\lambda = 488$  nm, 15 mW) and (c) Rose Bengal in DMSO ( $\lambda = 532$  nm, 15 mW); the rate of decrease in absorption measured at 420 nm in (b) **Ir6** and (d) Rose Bengal. The concentration used for DPBF was 60  $\mu$ M; **Ir6** (6  $\mu$ M) and Rose Bengal (8  $\mu$ M).

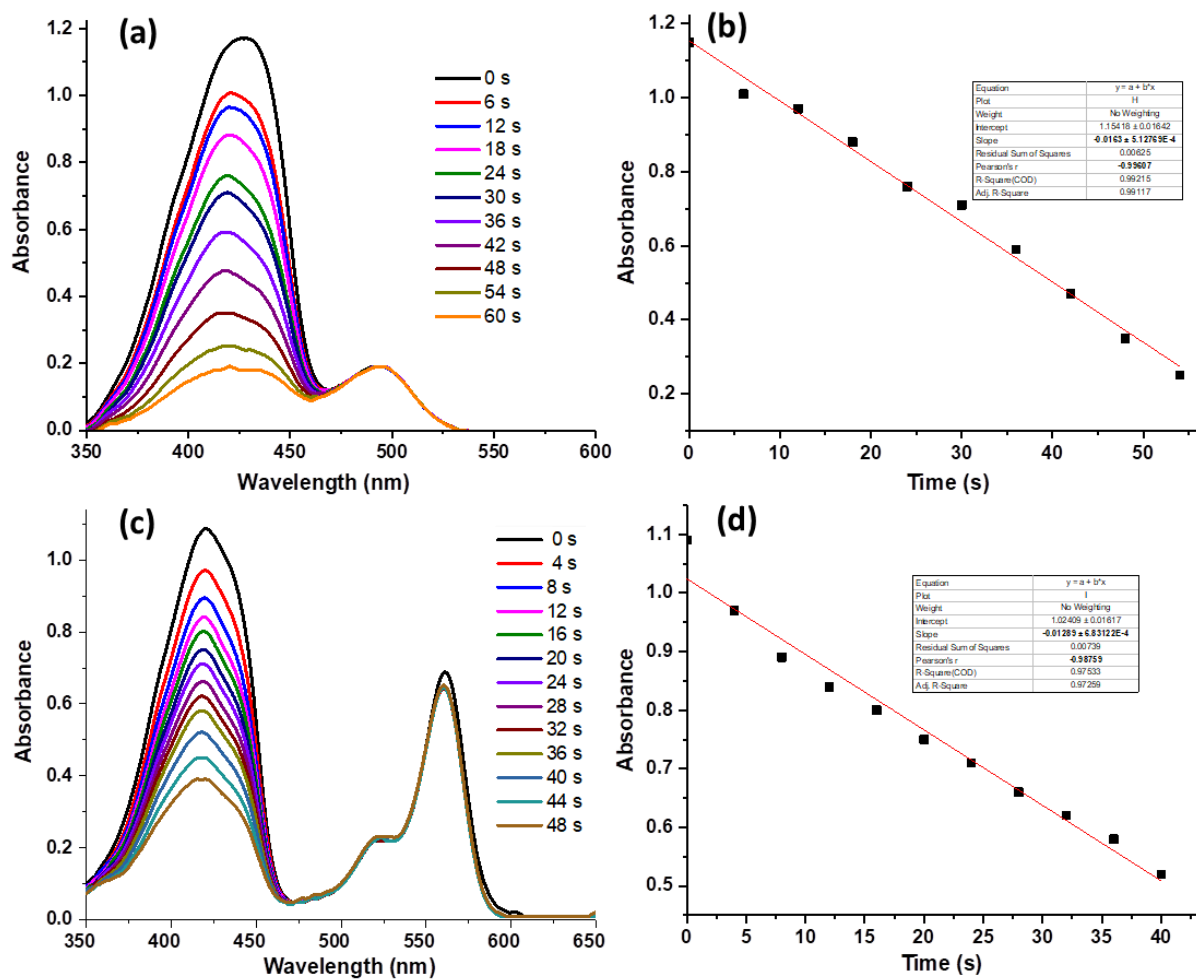

**Figure S47** UV-vis spectral changes upon photoirradiation of (a) **Ir7** in  $\text{CHCl}_3$  ( $\lambda = 488 \text{ nm}$ ,  $15 \text{ mW}$ ) and (c) Rose Bengal in DMSO ( $\lambda = 532 \text{ nm}$ ,  $15 \text{ mW}$ ); the rate of decrease in absorption measured at  $420 \text{ nm}$  in (b) **Ir7** and (d) Rose Bengal. The concentration used for DPBF was  $60 \mu\text{M}$ ; **Ir7** ( $6 \mu\text{M}$ ) and Rose Bengal ( $8 \mu\text{M}$ ).

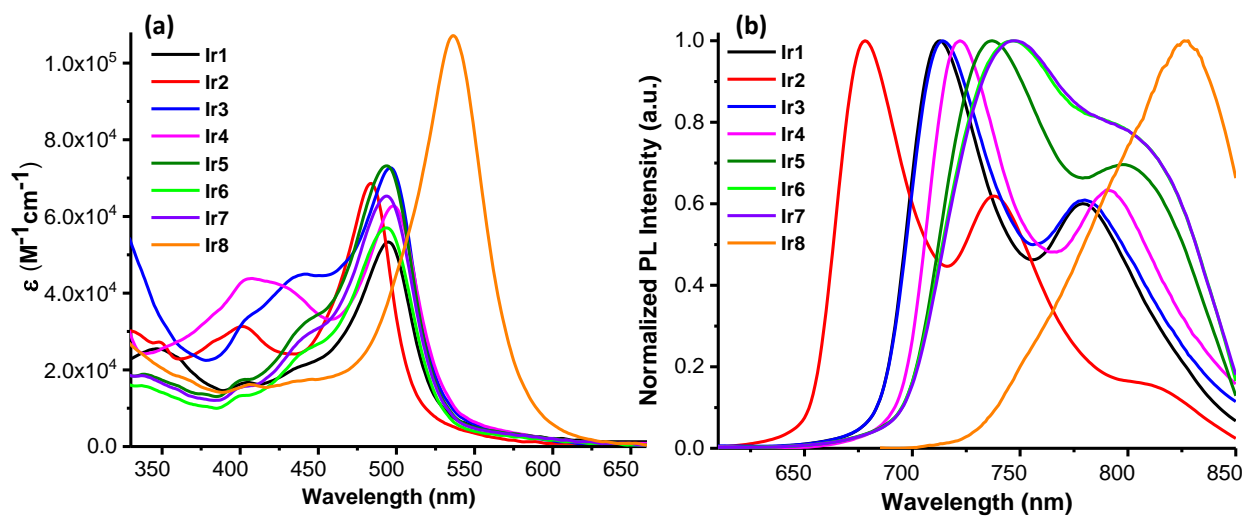

**Figure S48** Absorption and emission spectra of **Ir1-Ir8** in toluene.

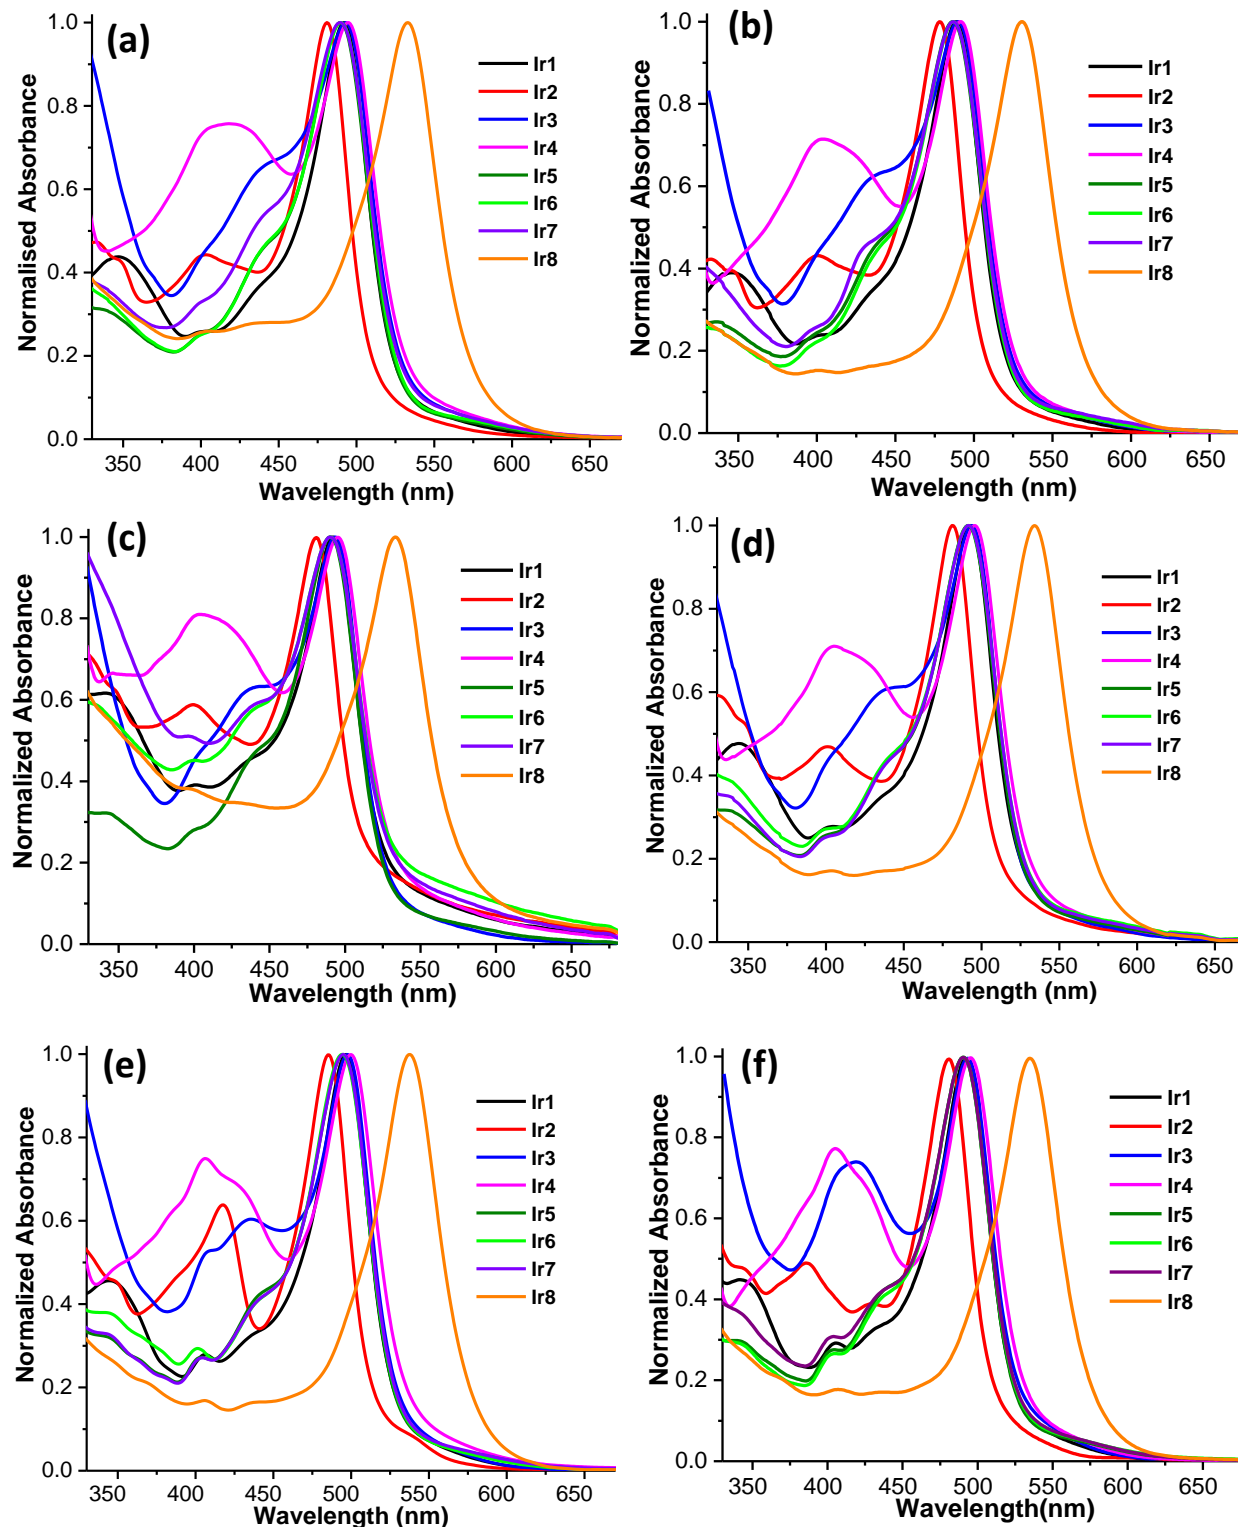

**Figure S49** Solvatochromic absorption spectra of Iridium dipyrinates (**Ir1-Ir8**) in solvent (a) DMF (b) ACN (c) THF (d) DCM (e) CCl<sub>4</sub> (f) Hexane.



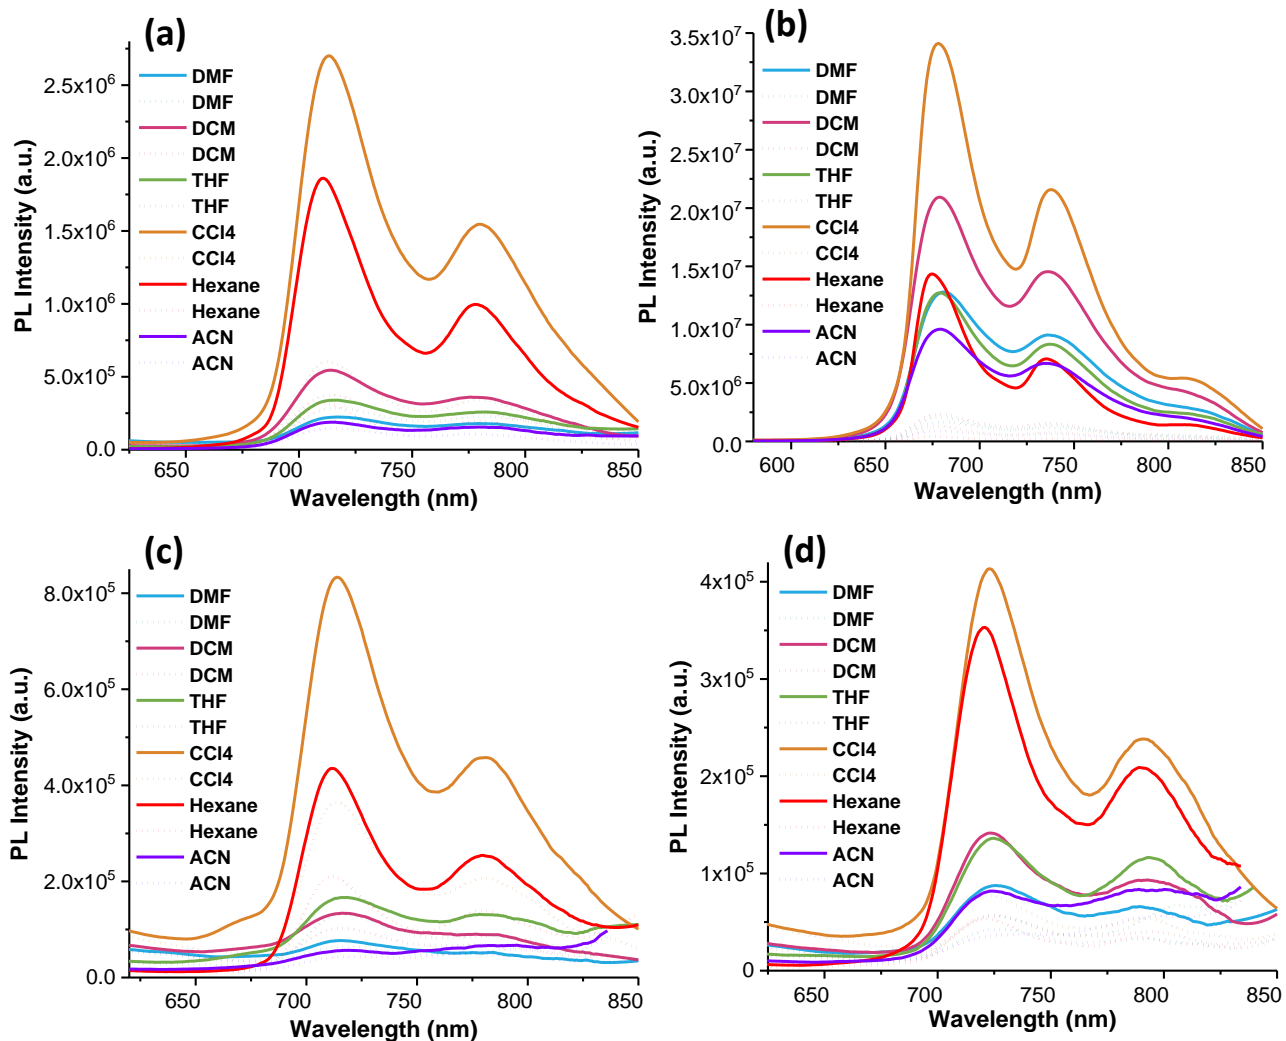

**Figure S50** Emission spectra in deoxygenated (solid) and oxygenated (dashed) solvents of iridium dipyrinates (a) Ir1 (b) Ir2 (c) Ir3 (d) Ir4.

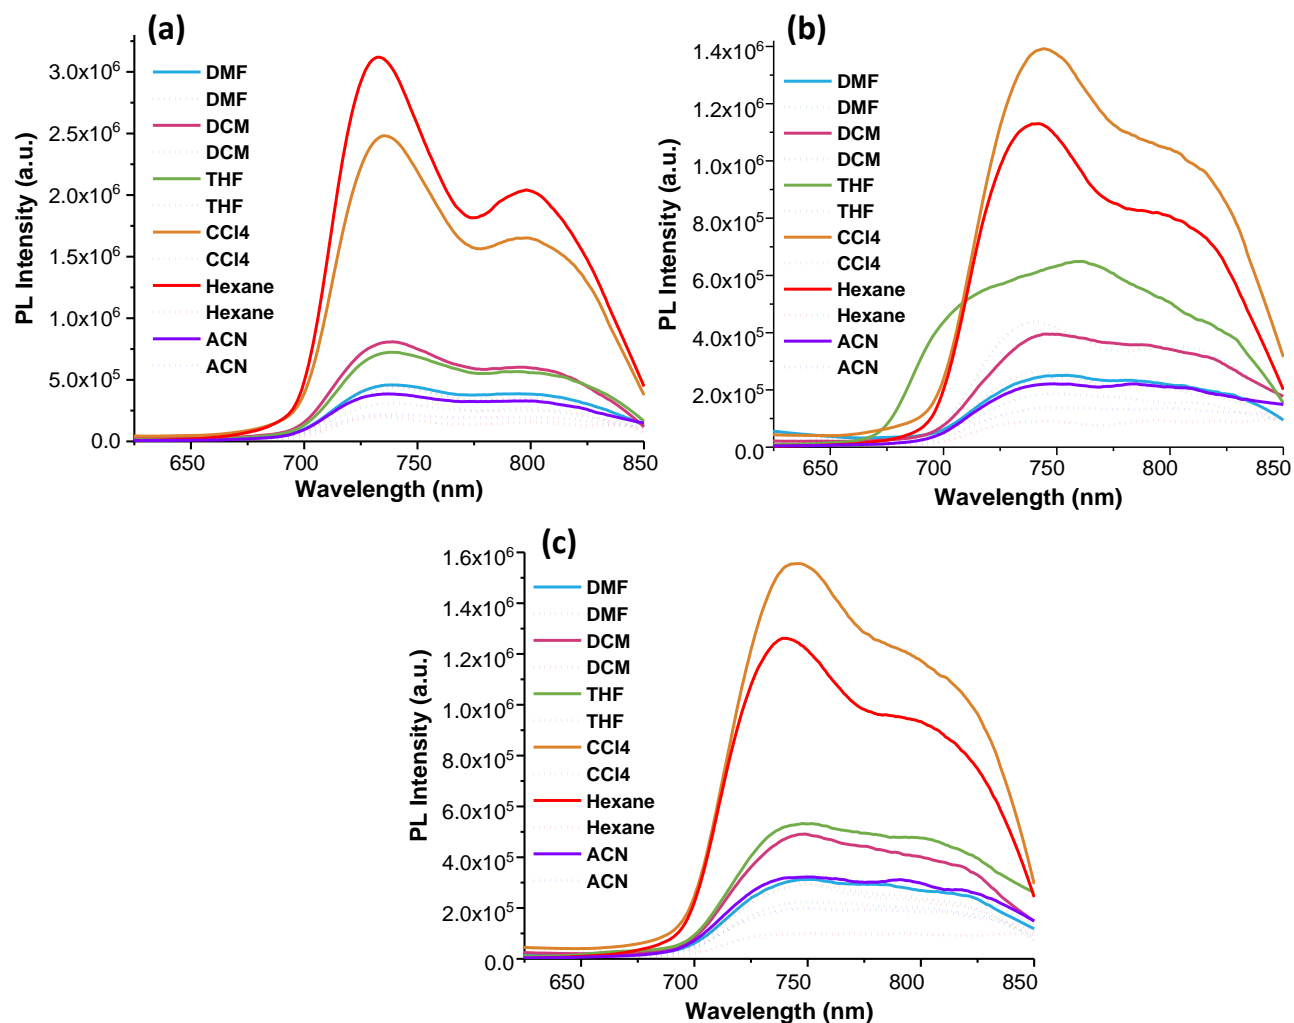

**Figure S51** Emission spectra in deoxygenated (solid) and oxygenated (dashed) solvents of iridium dipyrrinates (a) **Ir5** (b) **Ir6** (c) **Ir7**.

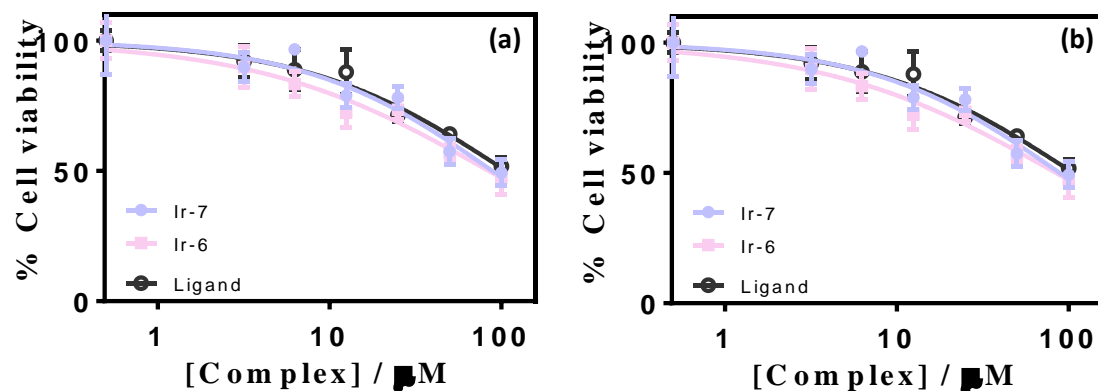

**Figure S52** Cell Viability plots in the absence of light (Dark); (a) HaCaT and (b) A549 cell lines treated with iridium dipyrrinates **Ir6** and **Ir7** and ligand for 24 h incubation.

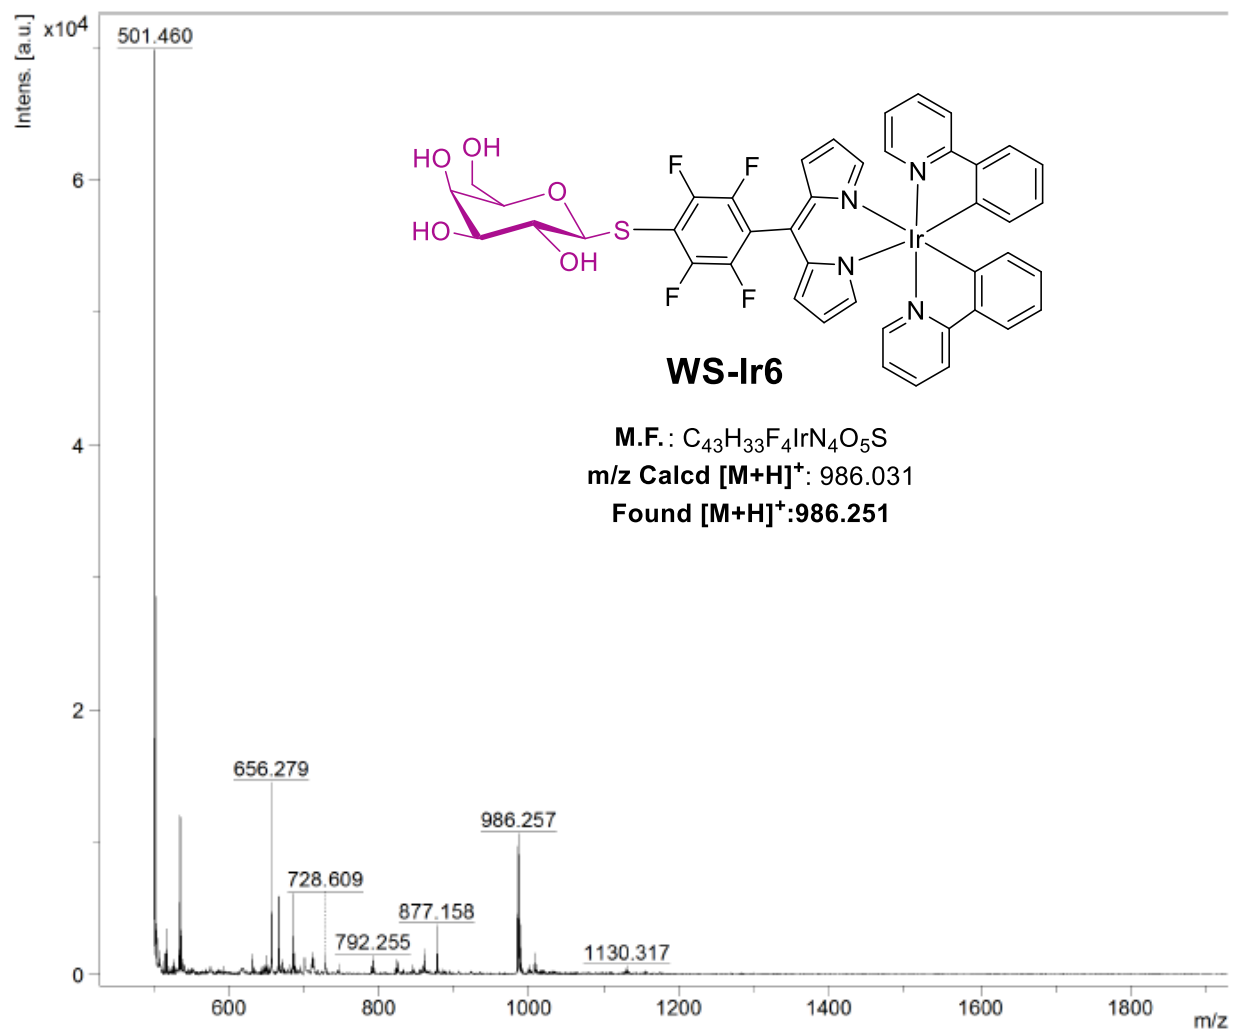

**Figure S55** MALDI-MS of compound **WS-Ir6**

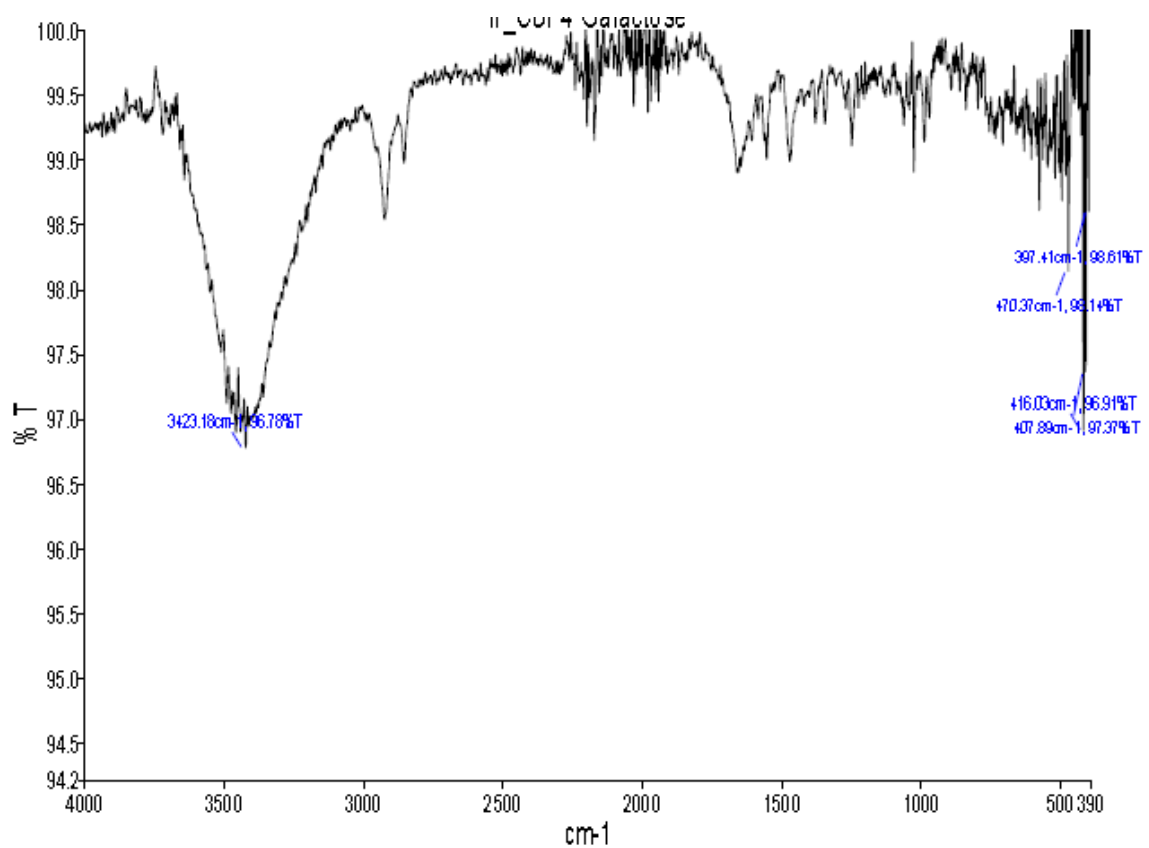

**Figure S56** IR spectrum of compound **WS-Ir6**

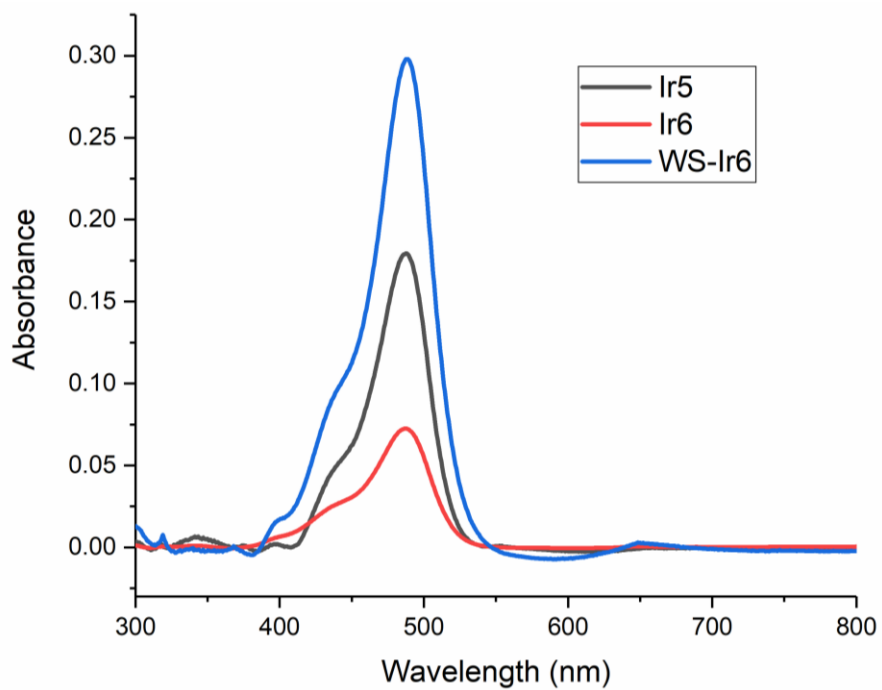

**Figure S57** Comparison of absorption spectra of **Ir5**, **Ir6**, and, **WS-Ir6** in methanol.

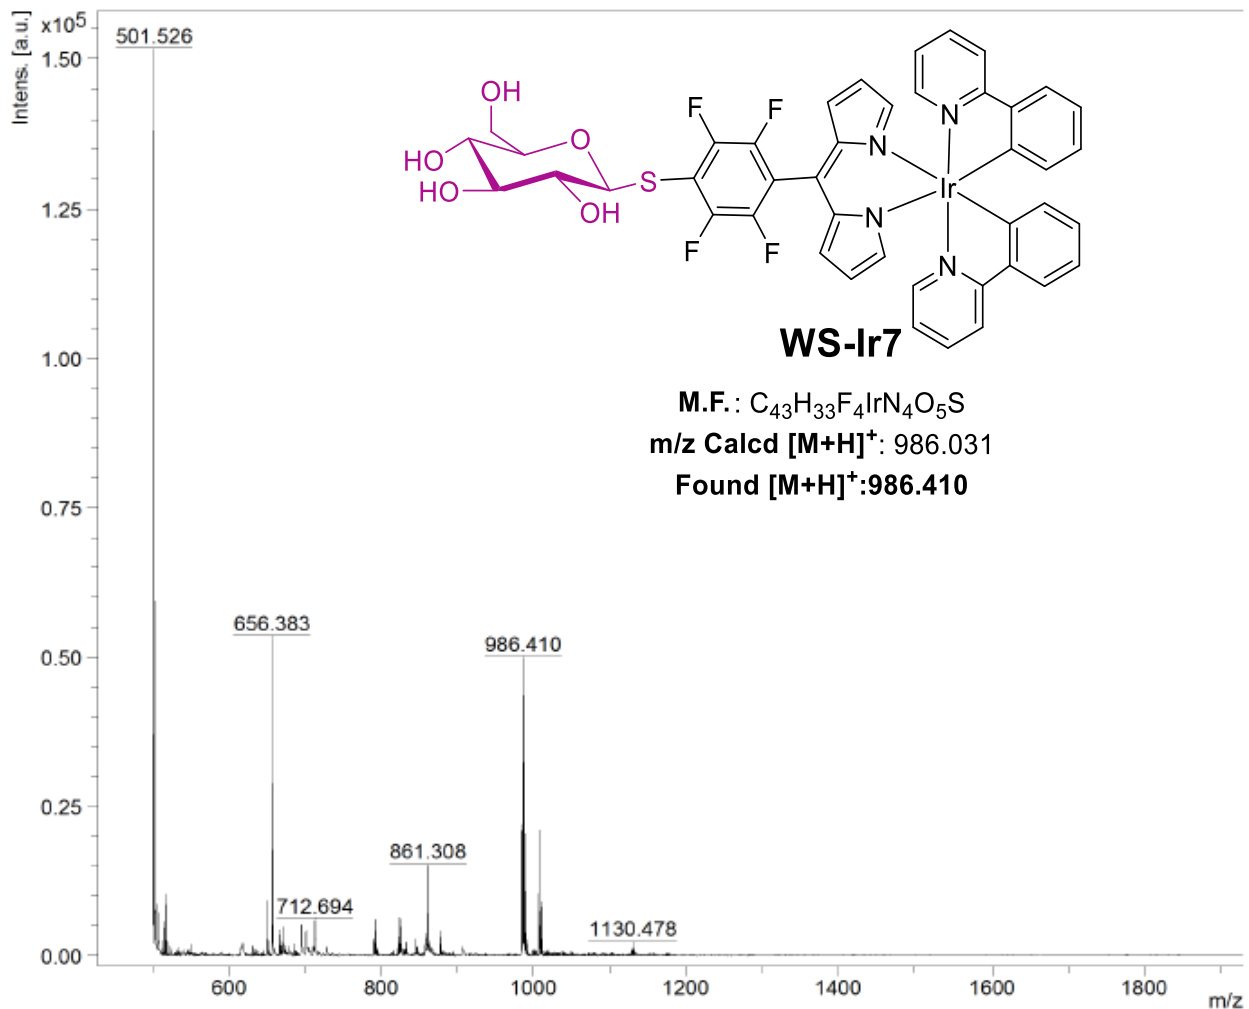

**Figure S58** MALD-MS of compound **WS-Ir7**.

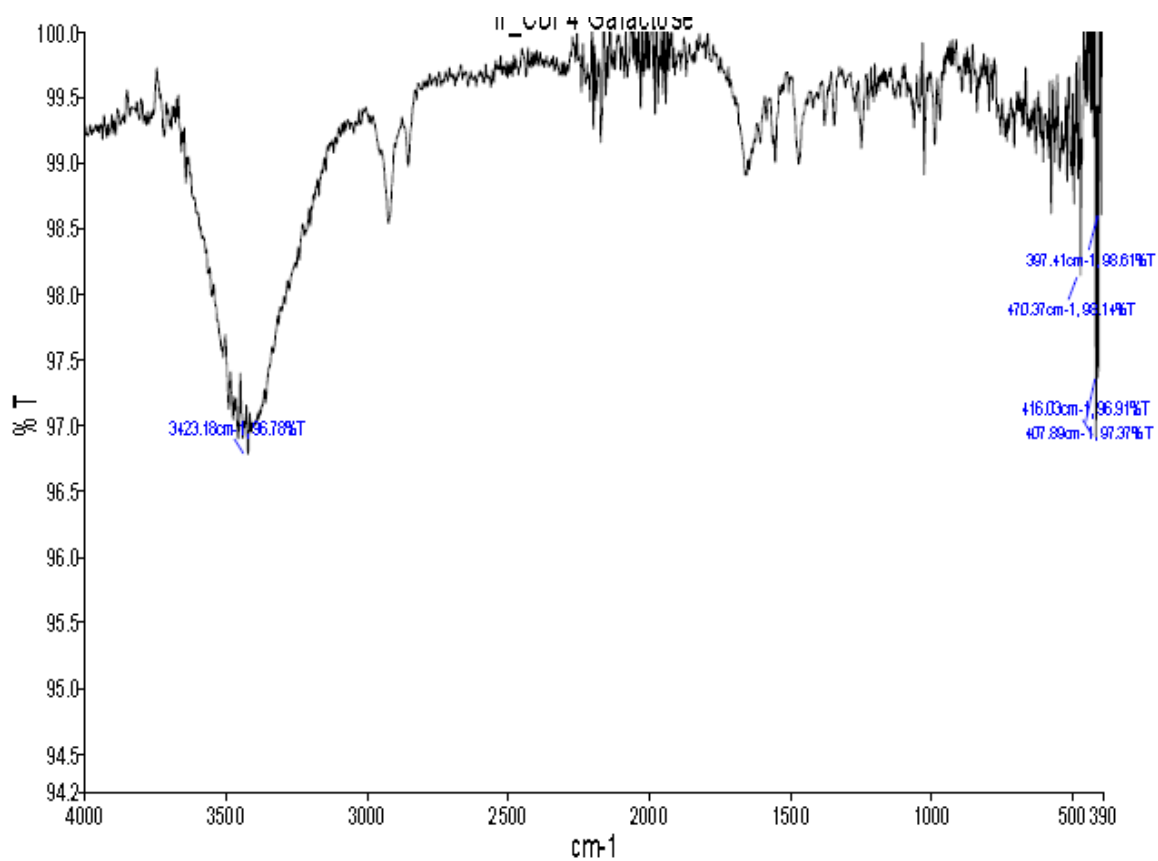

**Figure S59** IR spectrum of compound **WS-Ir7**.

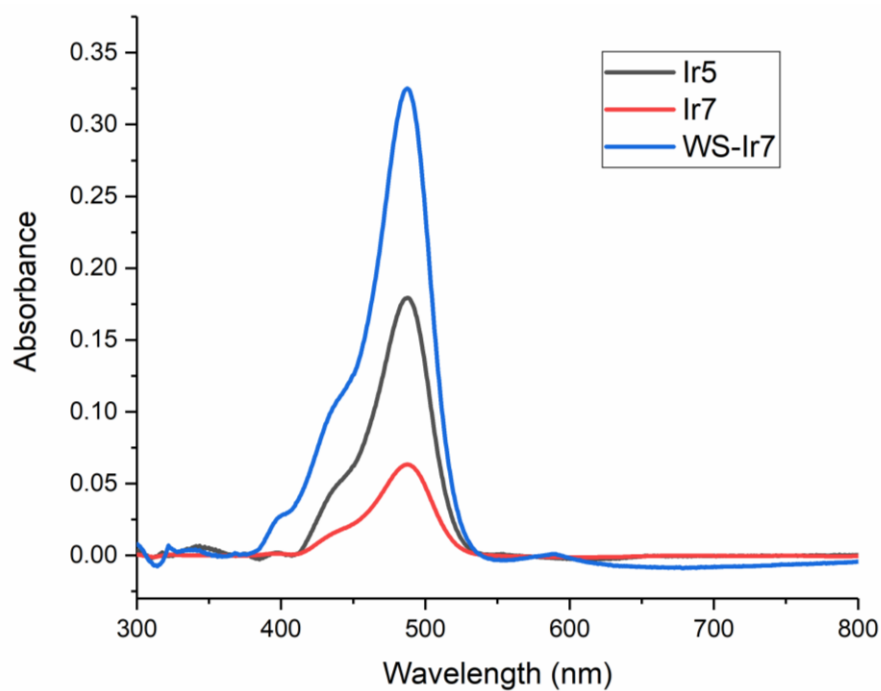

**Figure S60** Comparison of absorption spectra of **Ir5**, **Ir7**, and **WS-Ir7** in methanol.

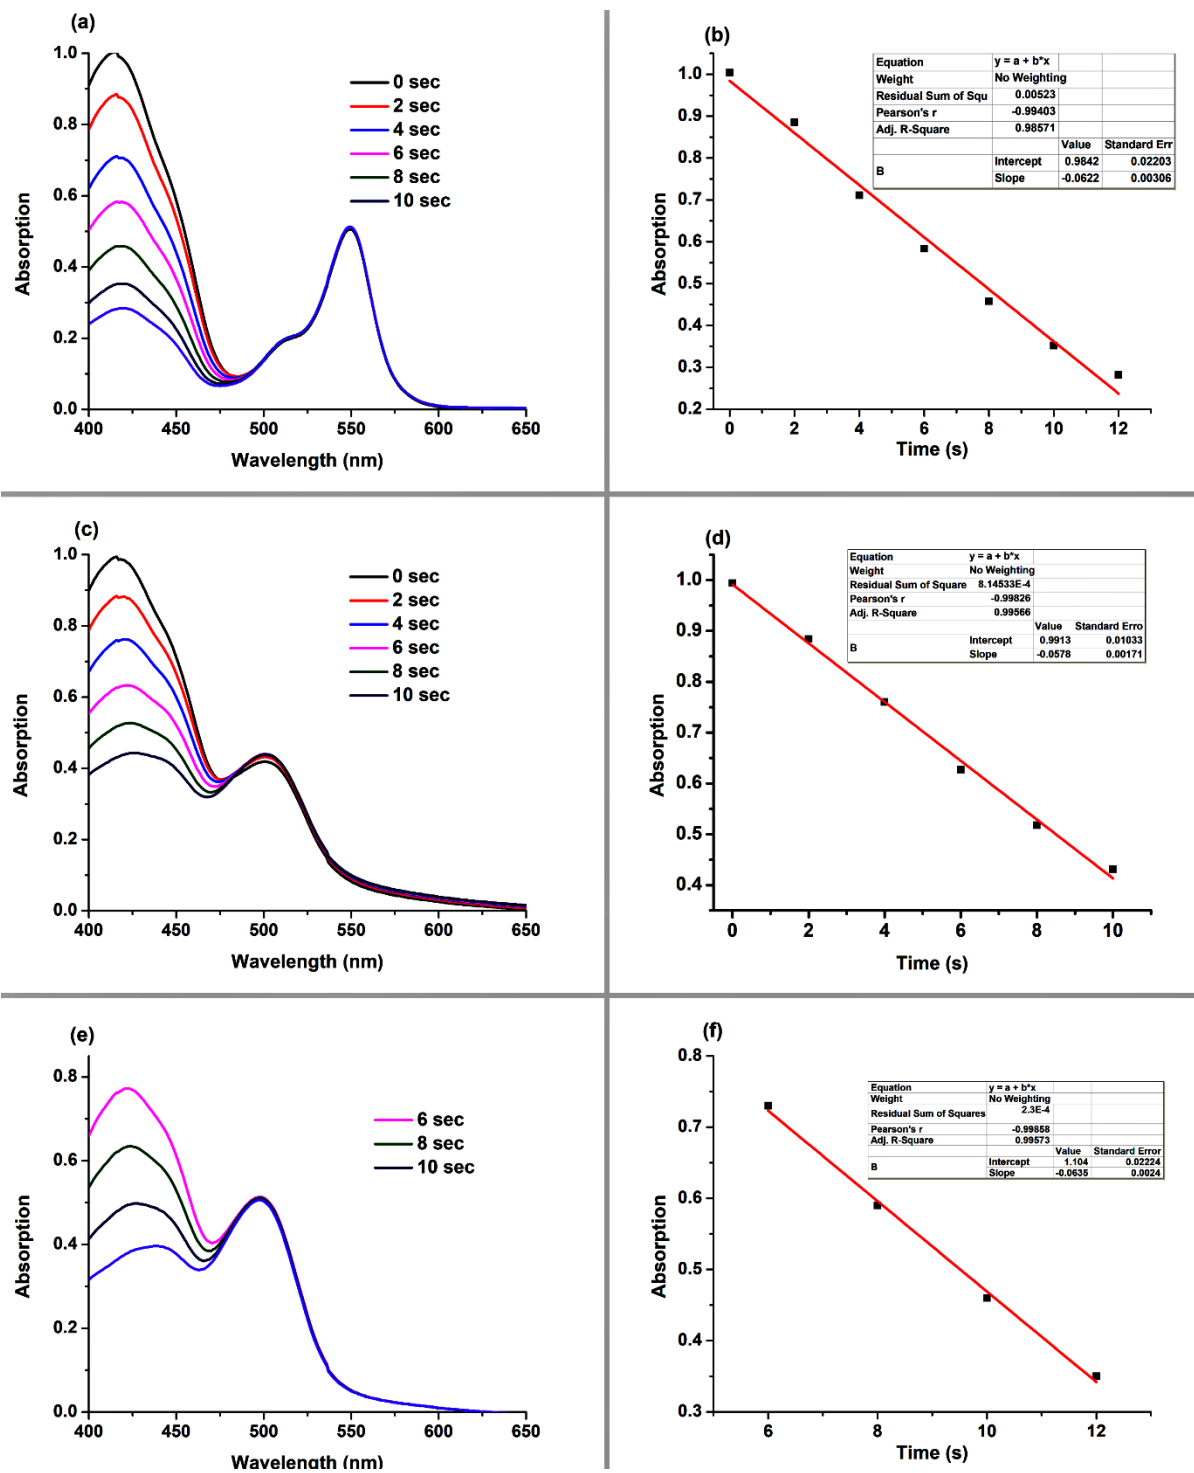

**Figure S61** Changes in absorption spectra: (a) **Rose Bengal**, (c) **Ir6**, and (e) **Ir7** upon irradiation of light (LED light, 3W) in water; rate of decrease of absorbance at 410 nm: (b) **Rose Bengal**, (d) **Ir6**, and (f) **Ir7**.

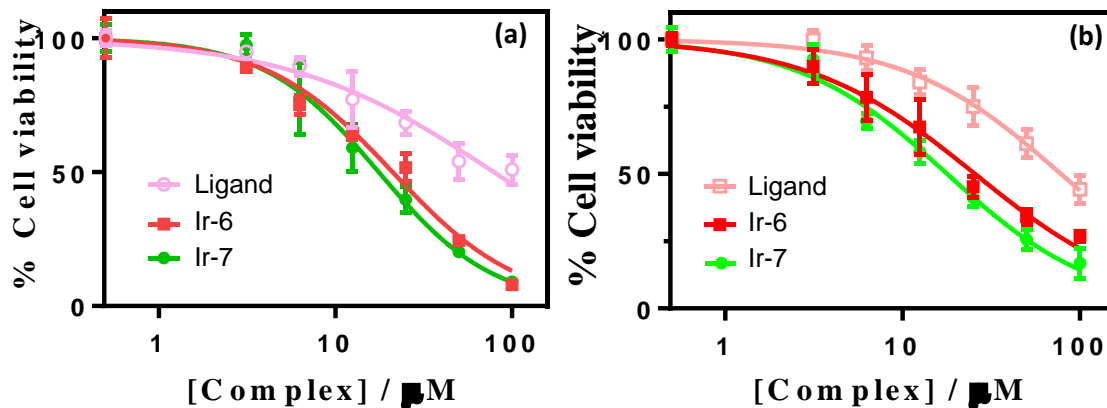

**Figure S62** Cell Viability plots in the presence of light; (a) HaCaT and (b) A549 cell line treated with iridium dipyrrinates **Ir6** and **Ir7** and ligand for 24 h incubation, exposed to light ( $\lambda = 400\text{-}700\text{ nm}$ ,  $10\text{ J cm}^{-2}$  for 1 h).

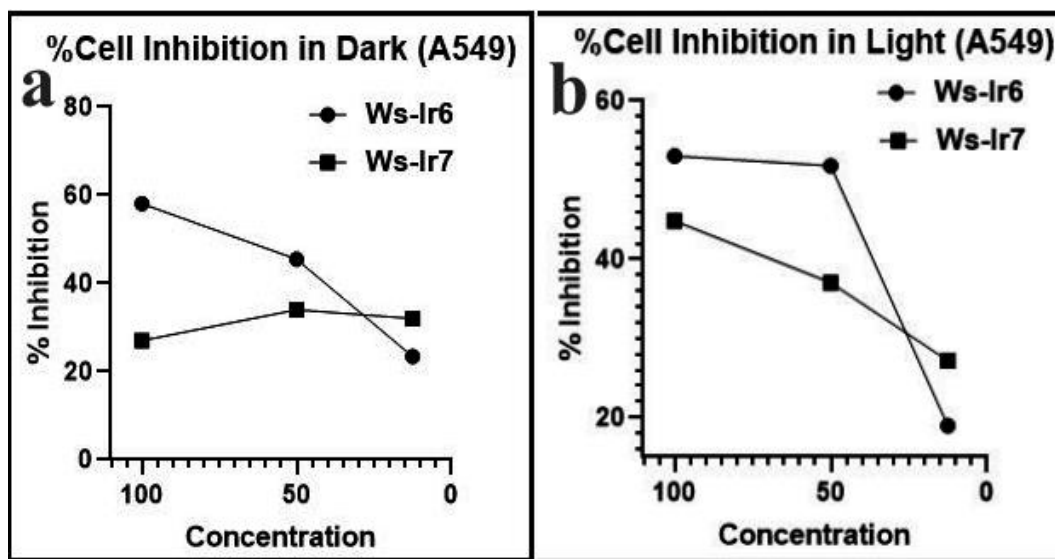

**Figure S63** Cell Viability plots in the presence of light and dark conditions on A549 cell line, treated with water soluble iridium dipyrrinates (a) **WS-Ir6** and (b) **WS-Ir7** after 24 h incubation, exposed to light ( $\lambda = 400\text{-}700\text{ nm}$ ,  $10\text{ J cm}^{-2}$  for 1 h).



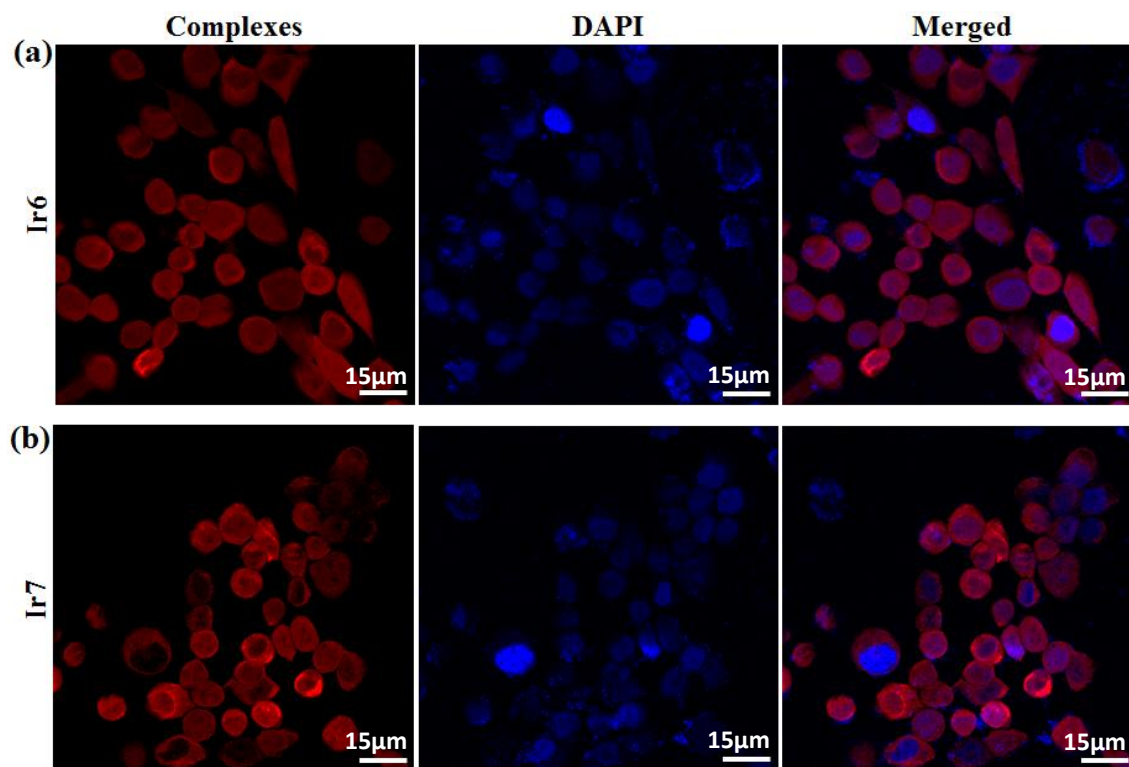

**Figure S64** Confocal microscopic image of (a) **Ir6** (top) and (b) **Ir7** (bottom), showing red emission in HaCaT cell line at 24-hour incubation in dark; merged panels with DAPI showing preferable cytoplasmic distribution of iridium dipyrrinates. Scale bar 15  $\mu\text{m}$ .

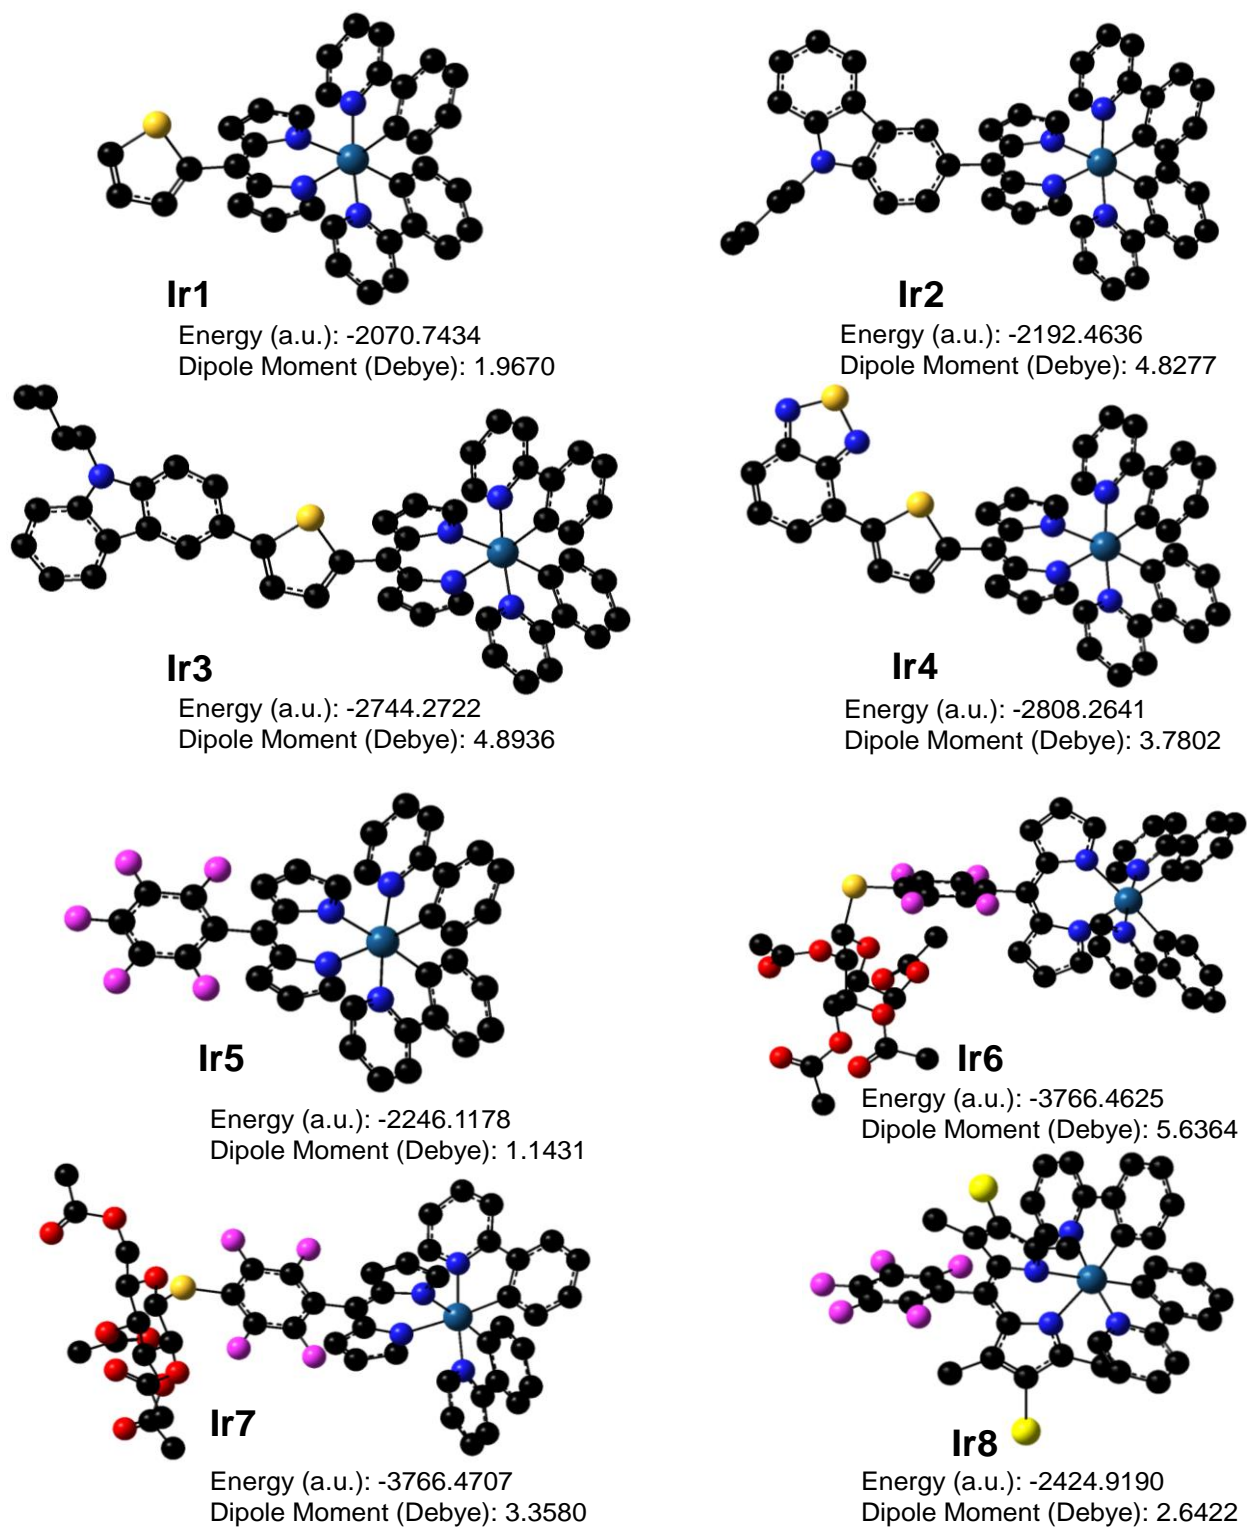

**Figure 65** DFT-D3 based geometry optimized structure of iridium dipyrinates **Ir1-Ir8**.

**Table S3.** Calculated electronic excitation energies and corresponding orbitals involved in the transition for **Ir1-Ir8** using CPCM-TD-BMK/6-311+ G (2d,p) level of approximation.

| Complexes  | Electronic Transition | Orbitals Contribution                                                                                                                                                   | Energy (nm) | Oscillatory strength ( <i>f</i> ) | Experimental Absorption DMSO (nm) |
|------------|-----------------------|-------------------------------------------------------------------------------------------------------------------------------------------------------------------------|-------------|-----------------------------------|-----------------------------------|
| <b>Ir1</b> | $S_0 \rightarrow S_1$ | HOMO-3 $\rightarrow$ LUMO (10%)<br>HOMO-1 $\rightarrow$ LUMO (57%)<br>HOMO $\rightarrow$ LUMO (7%)<br>HOMO $\rightarrow$ LUMO+1 (22%)                                   | 407         | 0.35                              | 495                               |
| <b>Ir2</b> | $S_0 \rightarrow S_1$ | HOMO-5 $\rightarrow$ LUMO (4%)<br>HOMO-4 $\rightarrow$ LUMO (20%)<br>HOMO-2 $\rightarrow$ LUMO (3%)<br>HOMO-1 $\rightarrow$ LUMO (48%)<br>HOMO $\rightarrow$ LUMO (23%) | 397         | 0.36                              | 484                               |
| <b>Ir3</b> | $S_0 \rightarrow S_1$ | HOMO-4 $\rightarrow$ LUMO (14%)<br>HOMO-2 $\rightarrow$ LUMO (74%)<br>HOMO-1 $\rightarrow$ LUMO (3%)<br>HOMO $\rightarrow$ LUMO (8%)                                    | 411         | 0.40                              | 496                               |
| <b>Ir4</b> | $S_0 \rightarrow S_1$ | HOMO-4 $\rightarrow$ LUMO+1 (24%)<br>HOMO-3 $\rightarrow$ LUMO+1 (11%)<br>HOMO-1 $\rightarrow$ LUMO+1 (54%)<br>HOMO $\rightarrow$ LUMO+1 (6%)                           | 403         | 0.32                              | 498                               |
| <b>Ir5</b> | $S_0 \rightarrow S_1$ | HOMO-3 $\rightarrow$ LUMO (11%)<br>HOMO-1 $\rightarrow$ LUMO (86%)                                                                                                      | 400         | 0.50                              | 494                               |
| <b>Ir6</b> | $S_0 \rightarrow S_1$ | HOMO-3 $\rightarrow$ LUMO (9%)<br>HOMO-1 $\rightarrow$ LUMO (71%)<br>HOMO $\rightarrow$ LUMO+1 (16%)                                                                    | 408         | 0.37                              | 494                               |
| <b>Ir7</b> | $S_0 \rightarrow S_1$ | HOMO-3 $\rightarrow$ LUMO (10%)<br>HOMO-1 $\rightarrow$ LUMO (85%)<br>HOMO $\rightarrow$ LUMO+1 (2%)                                                                    | 401         | 0.47                              | 494                               |
| <b>Ir8</b> | $S_0 \rightarrow S_1$ | HOMO-3 $\rightarrow$ LUMO (13%)<br>HOMO-1 $\rightarrow$ LUMO (8%)<br>HOMO $\rightarrow$ LUMO (77%)                                                                      | 476         | 0.49                              | 536                               |

**Table S4** B3LYP/6-31G//B3LYP/ LANL2DZ gas phase optimized coordinates of complexes **Ir1-Ir8**.

**Ir1**

| Center Number | Atomic Number | Atomic Type | Coordinates (Angstroms) |           |           |
|---------------|---------------|-------------|-------------------------|-----------|-----------|
|               |               |             | X                       | Y         | Z         |
| 1             | 77            | 0           | -0.687723               | -0.117822 | -0.219689 |

|    |   |   |           |           |           |
|----|---|---|-----------|-----------|-----------|
| 2  | 6 | 0 | -2.982017 | -1.785807 | -0.320753 |
| 3  | 6 | 0 | -1.654203 | -1.999887 | -2.234044 |
| 4  | 6 | 0 | -3.942549 | -2.671326 | -0.814519 |
| 5  | 6 | 0 | -3.052097 | -1.138489 | 1.063543  |
| 6  | 6 | 0 | -2.570585 | -2.913800 | -2.783774 |
| 7  | 1 | 0 | -0.765589 | -1.742722 | -2.771716 |
| 8  | 6 | 0 | -3.733236 | -3.244767 | -2.072125 |
| 9  | 1 | 0 | -4.815530 | -2.907700 | -0.242734 |
| 10 | 6 | 0 | -2.001760 | -0.284827 | 1.316842  |
| 11 | 6 | 0 | -4.055797 | -1.355803 | 2.008932  |
| 12 | 1 | 0 | -2.382625 | -3.353643 | -3.740953 |
| 13 | 1 | 0 | -4.447334 | -3.926709 | -2.484361 |
| 14 | 6 | 0 | -1.903767 | 0.394512  | 2.532913  |
| 15 | 6 | 0 | -3.977505 | -0.683961 | 3.241844  |
| 16 | 1 | 0 | -4.868030 | -2.020203 | 1.799862  |
| 17 | 6 | 0 | -2.901050 | 0.190808  | 3.504041  |
| 18 | 1 | 0 | -1.085720 | 1.057726  | 2.722411  |
| 19 | 1 | 0 | -4.734926 | -0.836008 | 3.982205  |
| 20 | 1 | 0 | -2.843633 | 0.700278  | 4.443285  |
| 21 | 7 | 0 | -1.898360 | -1.448004 | -1.036466 |
| 22 | 7 | 0 | 0.319480  | 0.029519  | -1.888705 |
| 23 | 6 | 0 | 0.051832  | 1.260051  | -2.670934 |
| 24 | 6 | 0 | 1.775812  | 0.117010  | -1.634479 |
| 25 | 6 | 0 | 1.209362  | 1.740306  | -3.177529 |
| 26 | 1 | 0 | -0.912295 | 1.701996  | -2.812542 |
| 27 | 6 | 0 | 2.344516  | 0.980008  | -2.502043 |
| 28 | 1 | 0 | 1.310494  | 2.519537  | -3.903797 |
| 29 | 1 | 0 | 3.392269  | 1.119250  | -2.668595 |
| 30 | 7 | 0 | 0.369057  | -1.694100 | 0.278673  |
| 31 | 6 | 0 | 1.828160  | -1.430762 | 0.343437  |
| 32 | 6 | 0 | 0.062715  | -2.209959 | 1.634187  |
| 33 | 6 | 0 | 2.363929  | -2.079246 | 1.399507  |
| 34 | 6 | 0 | 1.204922  | -2.585549 | 2.250273  |
| 35 | 1 | 0 | -0.916118 | -2.273128 | 2.061784  |
| 36 | 1 | 0 | 3.406147  | -2.199342 | 1.609740  |
| 37 | 1 | 0 | 1.281913  | -3.123880 | 3.171823  |
| 38 | 6 | 0 | 2.521065  | -0.647782 | -0.523367 |
| 39 | 6 | 0 | 0.187016  | 2.320598  | 0.906046  |
| 40 | 6 | 0 | 1.745703  | 0.602541  | 1.232461  |
| 41 | 6 | 0 | 0.932090  | 3.223919  | 1.666806  |
| 42 | 6 | 0 | -1.106281 | 2.689044  | 0.162852  |
| 43 | 6 | 0 | 2.560886  | 1.469266  | 1.982196  |
| 44 | 1 | 0 | 2.056009  | -0.405496 | 1.052177  |
| 45 | 6 | 0 | 2.141893  | 2.788330  | 2.217386  |
| 46 | 1 | 0 | 0.588825  | 4.225638  | 1.820188  |
| 47 | 6 | 0 | -1.647990 | 1.634995  | -0.541326 |

|    |    |   |           |           |           |
|----|----|---|-----------|-----------|-----------|
| 48 | 6  | 0 | -1.701495 | 3.951136  | 0.146949  |
| 49 | 1  | 0 | 3.494991  | 1.124191  | 2.373679  |
| 50 | 1  | 0 | 2.740386  | 3.451388  | 2.806528  |
| 51 | 6  | 0 | -2.750031 | 1.815030  | -1.378193 |
| 52 | 6  | 0 | -2.837053 | 4.149373  | -0.659955 |
| 53 | 1  | 0 | -1.299851 | 4.752265  | 0.731552  |
| 54 | 6  | 0 | -3.350483 | 3.086229  | -1.435832 |
| 55 | 1  | 0 | -3.133448 | 1.002555  | -1.959444 |
| 56 | 1  | 0 | -3.311079 | 5.108265  | -0.688196 |
| 57 | 1  | 0 | -4.199381 | 3.247444  | -2.066947 |
| 58 | 7  | 0 | 0.575251  | 1.043021  | 0.750804  |
| 59 | 6  | 0 | 4.049053  | -0.512972 | -0.386754 |
| 60 | 6  | 0 | 4.834878  | 0.246401  | -1.195893 |
| 61 | 16 | 0 | 5.027813  | -1.330736 | 0.842260  |
| 62 | 6  | 0 | 6.345960  | 0.020700  | -0.922590 |
| 63 | 1  | 0 | 4.455968  | 0.912938  | -1.942262 |
| 64 | 6  | 0 | 6.557419  | -0.887693 | 0.066886  |
| 65 | 1  | 0 | 7.129963  | 0.513565  | -1.458623 |
| 66 | 1  | 0 | 7.514413  | -1.282981 | 0.336745  |

---

## Ir2

---

| Center<br>Number | Atomic<br>Number | Atomic<br>Type | Coordinates (Angstroms) |           |           |
|------------------|------------------|----------------|-------------------------|-----------|-----------|
|                  |                  |                | X                       | Y         | Z         |
| 1                | 77               | 0              | 2.372093                | -0.036900 | 0.024001  |
| 2                | 6                | 0              | 3.216692                | 2.735101  | 0.346001  |
| 3                | 6                | 0              | 1.600992                | 2.577100  | -1.386099 |
| 4                | 6                | 0              | 3.294191                | 4.127701  | 0.165101  |
| 5                | 6                | 0              | 3.967392                | 1.942101  | 1.328101  |
| 6                | 6                | 0              | 1.650992                | 3.960500  | -1.593999 |
| 7                | 1                | 0              | 0.932792                | 1.933900  | -1.986899 |
| 8                | 6                | 0              | 2.507991                | 4.741700  | -0.809799 |
| 9                | 1                | 0              | 3.966191                | 4.715401  | 0.790701  |
| 10               | 6                | 0              | 3.691793                | 0.544901  | 1.329701  |
| 11               | 6                | 0              | 4.900592                | 2.506601  | 2.216801  |
| 12               | 1                | 0              | 1.024691                | 4.416900  | -2.359499 |
| 13               | 1                | 0              | 2.559191                | 5.821100  | -0.959299 |
| 14               | 6                | 0              | 4.381493                | -0.251199 | 2.262401  |
| 15               | 6                | 0              | 5.568292                | 1.690101  | 3.125901  |
| 16               | 1                | 0              | 5.100792                | 3.576701  | 2.195401  |
| 17               | 6                | 0              | 5.306493                | 0.310101  | 3.144601  |
| 18               | 1                | 0              | 4.204693                | -1.328599 | 2.296801  |
| 19               | 1                | 0              | 6.291892                | 2.114702  | 3.816601  |

|    |   |   |           |           |           |
|----|---|---|-----------|-----------|-----------|
| 20 | 1 | 0 | 5.834293  | -0.324999 | 3.855801  |
| 21 | 7 | 0 | 2.369592  | 1.953200  | -0.438199 |
| 22 | 7 | 0 | 1.032893  | -0.523500 | -1.440599 |
| 23 | 6 | 0 | 1.346793  | -0.903800 | -2.704299 |
| 24 | 6 | 0 | -0.401407 | -0.504601 | -1.365799 |
| 25 | 6 | 0 | 0.158693  | -1.135100 | -3.490299 |
| 26 | 6 | 0 | -0.918307 | -0.886901 | -2.666999 |
| 27 | 1 | 0 | 0.153093  | -1.441400 | -4.516399 |
| 28 | 7 | 0 | 0.805093  | 0.340500  | 1.280701  |
| 29 | 6 | 0 | -0.598807 | 0.215499  | 1.002501  |
| 30 | 6 | 0 | 0.906693  | 0.738400  | 2.573401  |
| 31 | 6 | 0 | -1.322707 | 0.554899  | 2.214001  |
| 32 | 6 | 0 | -0.395307 | 0.879099  | 3.180401  |
| 33 | 1 | 0 | -0.569708 | 1.181999  | 4.192601  |
| 34 | 6 | 0 | -1.144707 | -0.169601 | -0.227599 |
| 35 | 6 | 0 | 3.462794  | -2.734299 | -0.159899 |
| 36 | 6 | 0 | 1.611394  | -2.708800 | 1.326001  |
| 37 | 6 | 0 | 3.619894  | -4.117899 | 0.038401  |
| 38 | 6 | 0 | 4.282093  | -1.881299 | -1.030199 |
| 39 | 6 | 0 | 1.737094  | -4.085300 | 1.547201  |
| 40 | 1 | 0 | 0.818394  | -2.121200 | 1.822701  |
| 41 | 6 | 0 | 2.753294  | -4.794900 | 0.896301  |
| 42 | 1 | 0 | 4.416494  | -4.649299 | -0.482699 |
| 43 | 6 | 0 | 3.903893  | -0.509099 | -1.078199 |
| 44 | 6 | 0 | 5.371994  | -2.368099 | -1.774999 |
| 45 | 1 | 0 | 1.046194  | -4.591900 | 2.219601  |
| 46 | 1 | 0 | 2.865195  | -5.867900 | 1.057901  |
| 47 | 6 | 0 | 4.656193  | 0.342401  | -1.907999 |
| 48 | 6 | 0 | 6.097493  | -1.498198 | -2.584599 |
| 49 | 1 | 0 | 5.647894  | -3.420099 | -1.719799 |
| 50 | 6 | 0 | 5.736693  | -0.141999 | -2.647399 |
| 51 | 1 | 0 | 4.404592  | 1.403401  | -1.972799 |
| 52 | 1 | 0 | 6.941793  | -1.862598 | -3.163799 |
| 53 | 1 | 0 | 6.310093  | 0.535402  | -3.279999 |
| 54 | 7 | 0 | 2.456093  | -2.023400 | 0.492101  |
| 55 | 1 | 0 | -1.963107 | -0.946701 | -2.908499 |
| 56 | 1 | 0 | 2.368493  | -1.010800 | -3.055799 |
| 57 | 1 | 0 | 1.856993  | 0.919300  | 3.066201  |
| 58 | 1 | 0 | -2.392907 | 0.538899  | 2.303301  |
| 59 | 6 | 0 | -2.629407 | -0.230101 | -0.333999 |
| 60 | 6 | 0 | -3.257207 | -1.481502 | -0.528899 |
| 61 | 6 | 0 | -3.383107 | 0.946998  | -0.239599 |
| 62 | 6 | 0 | -4.639307 | -1.593502 | -0.633899 |
| 63 | 1 | 0 | -2.637806 | -2.378001 | -0.594999 |
| 64 | 6 | 0 | -4.769207 | 0.864898  | -0.346699 |
| 65 | 1 | 0 | -2.897008 | 1.910299  | -0.087099 |

|    |   |   |            |           |           |
|----|---|---|------------|-----------|-----------|
| 66 | 6 | 0 | -5.397507  | -0.416602 | -0.549799 |
| 67 | 1 | 0 | -5.113806  | -2.559402 | -0.776599 |
| 68 | 6 | 0 | -5.830208  | 1.854098  | -0.294499 |
| 69 | 6 | 0 | -7.072608  | 1.150297  | -0.468399 |
| 70 | 6 | 0 | -5.841408  | 3.238798  | -0.117999 |
| 71 | 6 | 0 | -8.302408  | 1.821297  | -0.455999 |
| 72 | 6 | 0 | -7.067208  | 3.903697  | -0.109699 |
| 73 | 1 | 0 | -4.908008  | 3.782698  | 0.011001  |
| 74 | 6 | 0 | -8.277008  | 3.202397  | -0.275399 |
| 75 | 1 | 0 | -9.238108  | 1.286996  | -0.581299 |
| 76 | 1 | 0 | -7.094709  | 4.982697  | 0.027701  |
| 77 | 1 | 0 | -9.215508  | 3.756796  | -0.260399 |
| 78 | 7 | 0 | -6.792807  | -0.227003 | -0.671199 |
| 79 | 6 | 0 | -7.800307  | -1.301903 | -0.715299 |
| 80 | 6 | 0 | -8.189407  | -1.772903 | 0.695701  |
| 81 | 1 | 0 | -7.392906  | -2.149203 | -1.313399 |
| 82 | 1 | 0 | -8.695207  | -0.927803 | -1.264299 |
| 83 | 6 | 0 | -9.241606  | -2.886604 | 0.634101  |
| 84 | 1 | 0 | -7.290506  | -2.125503 | 1.239701  |
| 85 | 1 | 0 | -8.571707  | -0.918103 | 1.288801  |
| 86 | 6 | 0 | -9.634906  | -3.360704 | 2.030801  |
| 87 | 1 | 0 | -10.141806 | -2.529404 | 0.095701  |
| 88 | 1 | 0 | -8.855006  | -3.742603 | 0.046101  |
| 89 | 1 | 0 | -10.387706 | -4.156104 | 1.981901  |
| 90 | 1 | 0 | -8.774506  | -3.758603 | 2.581701  |
| 91 | 1 | 0 | -10.058106 | -2.546904 | 2.631501  |

### Ir3

| Center Number | Atomic Number | Atomic Type | Coordinates (Angstroms) |           |           |
|---------------|---------------|-------------|-------------------------|-----------|-----------|
|               |               |             | X                       | Y         | Z         |
| 1             | 77            | 0           | 3.724731                | -0.106809 | 0.141648  |
| 2             | 6             | 0           | 5.486624                | -2.017514 | 1.457255  |
| 3             | 6             | 0           | 3.904688                | -1.170309 | 2.961676  |
| 4             | 6             | 0           | 6.079329                | -2.778181 | 2.472257  |
| 5             | 6             | 0           | 5.916778                | -2.049915 | 0.033700  |
| 6             | 6             | 0           | 4.442813                | -1.921427 | 4.002759  |
| 7             | 1             | 0           | 3.047381                | -0.537555 | 3.124814  |
| 8             | 6             | 0           | 5.555875                | -2.728061 | 3.760491  |
| 9             | 1             | 0           | 6.933258                | -3.403725 | 2.251557  |
| 10            | 6             | 0           | 5.182514                | -1.204428 | -0.825792 |
| 11            | 6             | 0           | 6.969183                | -2.853001 | -0.436954 |
| 12            | 1             | 0           | 3.997625                | -1.873720 | 4.988635  |

|    |   |   |           |           |           |
|----|---|---|-----------|-----------|-----------|
| 13 | 1 | 0 | 6.000116  | -3.309977 | 4.558904  |
| 14 | 6 | 0 | 5.540851  | -1.187058 | -2.188386 |
| 15 | 6 | 0 | 7.302538  | -2.819491 | -1.789155 |
| 16 | 1 | 0 | 7.523505  | -3.495353 | 0.238350  |
| 17 | 6 | 0 | 6.588519  | -1.987026 | -2.662273 |
| 18 | 1 | 0 | 5.006831  | -0.553147 | -2.883309 |
| 19 | 1 | 0 | 8.112572  | -3.434736 | -2.163948 |
| 20 | 1 | 0 | 6.853624  | -1.966701 | -3.714948 |
| 21 | 7 | 0 | 4.432418  | -1.193709 | 1.719759  |
| 22 | 7 | 0 | 2.416553  | 0.882499  | 1.465465  |
| 23 | 6 | 0 | 2.836486  | 2.180439  | 1.791181  |
| 24 | 6 | 0 | 1.027843  | 1.081262  | 1.123038  |
| 25 | 6 | 0 | 1.792035  | 3.061246  | 1.923710  |
| 26 | 1 | 0 | 3.877187  | 2.423163  | 1.903371  |
| 27 | 6 | 0 | 0.630381  | 2.359412  | 1.517241  |
| 28 | 1 | 0 | 1.830811  | 4.076970  | 2.292881  |
| 29 | 1 | 0 | -0.356781 | 2.768516  | 1.558048  |
| 30 | 7 | 0 | 2.189273  | -1.563631 | 0.323921  |
| 31 | 6 | 0 | 0.781212  | -1.260194 | 0.096971  |
| 32 | 6 | 0 | 2.385660  | -2.683040 | -0.479789 |
| 33 | 6 | 0 | 0.192095  | -2.368989 | -0.551055 |
| 34 | 6 | 0 | 1.215955  | -3.245311 | -0.933195 |
| 35 | 1 | 0 | 3.378654  | -3.045015 | -0.691338 |
| 36 | 1 | 0 | -0.837847 | -2.556079 | -0.744607 |
| 37 | 1 | 0 | 1.098490  | -4.184474 | -1.454930 |
| 38 | 6 | 0 | 0.188124  | 0.009237  | 0.488974  |
| 39 | 6 | 0 | 4.207895  | 1.902336  | -2.036817 |
| 40 | 6 | 0 | 2.256183  | 0.871384  | -2.614538 |
| 41 | 6 | 0 | 4.189095  | 2.651100  | -3.222938 |
| 42 | 6 | 0 | 5.282060  | 2.130027  | -1.055347 |
| 43 | 6 | 0 | 2.162644  | 1.604783  | -3.796127 |
| 44 | 1 | 0 | 1.476317  | 0.179155  | -2.457011 |
| 45 | 6 | 0 | 3.151820  | 2.510895  | -4.125988 |
| 46 | 1 | 0 | 4.990782  | 3.343144  | -3.428476 |
| 47 | 6 | 0 | 5.206420  | 1.318308  | 0.073472  |
| 48 | 6 | 0 | 6.317055  | 3.073845  | -1.218560 |
| 49 | 1 | 0 | 1.311712  | 1.448403  | -4.447386 |
| 50 | 1 | 0 | 3.119026  | 3.078611  | -5.048415 |
| 51 | 6 | 0 | 6.171067  | 1.509466  | 1.086849  |
| 52 | 6 | 0 | 7.263492  | 3.241434  | -0.212213 |
| 53 | 1 | 0 | 6.392109  | 3.670332  | -2.118399 |
| 54 | 6 | 0 | 7.184533  | 2.461845  | 0.948442  |
| 55 | 1 | 0 | 6.126256  | 0.911986  | 1.990754  |
| 56 | 1 | 0 | 8.059905  | 3.967579  | -0.329675 |
| 57 | 1 | 0 | 7.915368  | 2.598790  | 1.739337  |
| 58 | 7 | 0 | 3.254827  | 0.942469  | -1.703836 |



|    |    |   |            |           |           |
|----|----|---|------------|-----------|-----------|
| 59 | 6  | 0 | -1.283410  | 0.380602  | 0.322039  |
| 60 | 6  | 0 | -1.838052  | 1.585415  | 0.712089  |
| 61 | 16 | 0 | -2.604792  | -0.597086 | -0.364747 |
| 62 | 6  | 0 | -3.277902  | 1.674521  | 0.617335  |
| 63 | 1  | 0 | -1.271544  | 2.417487  | 1.070027  |
| 64 | 6  | 0 | -3.846723  | 0.532256  | 0.136695  |
| 65 | 1  | 0 | -3.826024  | 2.560252  | 0.904477  |
| 66 | 6  | 0 | -5.299269  | 0.218631  | 0.036153  |
| 67 | 6  | 0 | -5.723782  | -1.018656 | -0.485714 |
| 68 | 6  | 0 | -6.252112  | 1.160474  | 0.464102  |
| 69 | 6  | 0 | -7.078427  | -1.338262 | -0.591368 |
| 70 | 1  | 0 | -4.987449  | -1.748216 | -0.815877 |
| 71 | 6  | 0 | -7.603305  | 0.847502  | 0.361417  |
| 72 | 1  | 0 | -5.941137  | 2.119106  | 0.869698  |
| 73 | 6  | 0 | -8.011228  | -0.396952 | -0.164823 |
| 74 | 1  | 0 | -7.386300  | -2.299443 | -0.997123 |
| 75 | 6  | 0 | -8.804214  | 1.575769  | 0.703094  |
| 76 | 6  | 0 | -9.916716  | 0.752313  | 0.374110  |
| 77 | 6  | 0 | -8.985204  | 2.844703  | 1.253278  |
| 78 | 6  | 0 | -11.213623 | 1.223180  | 0.605515  |
| 79 | 6  | 0 | -10.282029 | 3.304574  | 1.480458  |
| 80 | 1  | 0 | -8.127997  | 3.467861  | 1.501837  |
| 81 | 6  | 0 | -11.378130 | 2.498816  | 1.158329  |
| 82 | 1  | 0 | -12.088490 | 0.635327  | 0.371216  |
| 83 | 1  | 0 | -10.437543 | 4.293216  | 1.909252  |
| 84 | 1  | 0 | -12.387302 | 2.864977  | 1.338478  |
| 85 | 7  | 0 | -9.421423  | -0.492575 | -0.172811 |
| 86 | 6  | 0 | -10.082667 | -1.709560 | -0.681060 |
| 87 | 6  | 0 | -11.602736 | -1.704776 | -0.707515 |
| 88 | 1  | 0 | -9.738738  | -2.546856 | -0.051890 |
| 89 | 1  | 0 | -9.705877  | -1.866662 | -1.704546 |
| 90 | 6  | 0 | -12.156885 | -3.022117 | -1.257805 |
| 91 | 1  | 0 | -11.993577 | -1.546013 | 0.307997  |
| 92 | 1  | 0 | -11.959080 | -0.880365 | -1.345181 |
| 93 | 6  | 0 | -13.683075 | -3.041978 | -1.292668 |
| 94 | 1  | 0 | -11.762777 | -3.184309 | -2.275906 |
| 95 | 1  | 0 | -11.791853 | -3.858139 | -0.636220 |
| 96 | 1  | 0 | -14.056605 | -3.996515 | -1.691255 |
| 97 | 1  | 0 | -14.103008 | -2.909184 | -0.283873 |
| 98 | 1  | 0 | -14.074423 | -2.233562 | -1.929076 |

| Center<br>Number | Atomic<br>Number | Atomic<br>Type | Coordinates (Angstroms) |           |           |
|------------------|------------------|----------------|-------------------------|-----------|-----------|
|                  |                  |                | X                       | Y         | Z         |
| 1                | 77               | 0              | -2.222235               | -0.077658 | -0.026553 |
| 2                | 6                | 0              | -3.089148               | -2.861014 | -0.394910 |
| 3                | 6                | 0              | -1.547235               | -2.243068 | -2.058246 |
| 4                | 6                | 0              | -3.179131               | -4.142860 | -0.956217 |
| 5                | 6                | 0              | -3.807462               | -2.392893 | 0.792634  |
| 6                | 6                | 0              | -1.602233               | -3.497726 | -2.649319 |
| 7                | 1                | 0              | -0.920049               | -1.454046 | -2.453376 |
| 8                | 6                | 0              | -2.437574               | -4.465950 | -2.085498 |
| 9                | 1                | 0              | -3.829873               | -4.881163 | -0.502713 |
| 10               | 6                | 0              | -3.535751               | -1.049823 | 1.174193  |
| 11               | 6                | 0              | -4.695926               | -3.200120 | 1.524882  |
| 12               | 1                | 0              | -1.002507               | -3.704670 | -3.528603 |
| 13               | 1                | 0              | -2.507030               | -5.458605 | -2.519533 |
| 14               | 6                | 0              | -4.201313               | -0.567852 | 2.315684  |
| 15               | 6                | 0              | -5.333408               | -2.690893 | 2.652492  |
| 16               | 1                | 0              | -4.894816               | -4.224569 | 1.221107  |
| 17               | 6                | 0              | -5.082163               | -1.370137 | 3.045472  |
| 18               | 1                | 0              | -4.030640               | 0.454290  | 2.645008  |
| 19               | 1                | 0              | -6.021531               | -3.312998 | 3.218148  |
| 20               | 1                | 0              | -5.577372               | -0.966522 | 3.926245  |
| 21               | 7                | 0              | -2.269484               | -1.925880 | -0.965200 |
| 22               | 7                | 0              | -0.765433               | 0.833850  | -1.374967 |
| 23               | 6                | 0              | -1.016718               | 1.342633  | -2.585797 |
| 24               | 6                | 0              | 0.599017                | 1.025544  | -1.137569 |
| 25               | 6                | 0              | 0.147156                | 1.882039  | -3.186742 |
| 26               | 1                | 0              | -2.018004               | 1.299668  | -2.995952 |
| 27               | 6                | 0              | 1.162785                | 1.697022  | -2.274250 |
| 28               | 1                | 0              | 0.208273                | 2.325361  | -4.172342 |
| 29               | 1                | 0              | 2.200203                | 1.978030  | -2.377703 |
| 30               | 7                | 0              | -0.480182               | -0.721719 | 1.137746  |
| 31               | 6                | 0              | 0.822287                | -0.210607 | 1.048337  |
| 32               | 6                | 0              | -0.530592               | -1.450216 | 2.257096  |
| 33               | 6                | 0              | 1.560337                | -0.674296 | 2.187225  |
| 34               | 6                | 0              | 0.711679                | -1.460718 | 2.937186  |
| 35               | 1                | 0              | -1.454245               | -1.926915 | 2.557885  |
| 36               | 1                | 0              | 2.585366                | -0.424913 | 2.412936  |
| 37               | 1                | 0              | 0.930227                | -1.980139 | 3.861341  |
| 38               | 6                | 0              | 1.315497                | 0.575951  | -0.012989 |
| 39               | 6                | 0              | -3.319629               | 2.606352  | 0.453170  |
| 40               | 6                | 0              | -1.570337               | 2.143466  | 1.957016  |
| 41               | 6                | 0              | -3.471767               | 3.876594  | 1.026768  |
| 42               | 6                | 0              | -4.120168               | 2.054464  | -0.645439 |
| 43               | 6                | 0              | -1.684940               | 3.387662  | 2.559763  |

|    |    |   |           |           |           |
|----|----|---|-----------|-----------|-----------|
| 44 | 1  | 0 | -0.829624 | 1.416363  | 2.280864  |
| 45 | 6  | 0 | -2.656316 | 4.273270  | 2.081347  |
| 46 | 1  | 0 | -4.231428 | 4.548002  | 0.645125  |
| 47 | 6  | 0 | -3.779322 | 0.729041  | -1.040062 |
| 48 | 6  | 0 | -5.163854 | 2.758303  | -1.272807 |
| 49 | 1  | 0 | -1.026067 | 3.649189  | 3.380142  |
| 50 | 1  | 0 | -2.776737 | 5.256244  | 2.525576  |
| 51 | 6  | 0 | -4.542431 | 0.155285  | -2.073859 |
| 52 | 6  | 0 | -5.892111 | 2.162617  | -2.298354 |
| 53 | 1  | 0 | -5.415084 | 3.770559  | -0.967669 |
| 54 | 6  | 0 | -5.578787 | 0.856555  | -2.695747 |
| 55 | 1  | 0 | -4.323855 | -0.856001 | -2.406916 |
| 56 | 1  | 0 | -6.697784 | 2.707772  | -2.782318 |
| 57 | 1  | 0 | -6.147067 | 0.385408  | -3.495009 |
| 58 | 7  | 0 | -2.359943 | 1.759819  | 0.936304  |
| 59 | 6  | 0 | 2.738288  | 1.000497  | 0.030562  |
| 60 | 6  | 0 | 3.196220  | 2.296256  | 0.116644  |
| 61 | 16 | 0 | 4.073020  | -0.120578 | -0.041301 |
| 62 | 6  | 0 | 4.606715  | 2.395136  | 0.125267  |
| 63 | 1  | 0 | 2.527293  | 3.146975  | 0.181387  |
| 64 | 6  | 0 | 5.257581  | 1.179610  | 0.017065  |
| 65 | 1  | 0 | 5.126239  | 3.342478  | 0.210098  |
| 66 | 6  | 0 | 6.703283  | 0.955886  | -0.030461 |
| 67 | 6  | 0 | 7.294229  | -0.359404 | -0.017622 |
| 68 | 6  | 0 | 7.600196  | 2.011677  | -0.083261 |
| 69 | 6  | 0 | 8.737033  | -0.531656 | -0.053103 |
| 70 | 6  | 0 | 9.013605  | 1.837404  | -0.116857 |
| 71 | 1  | 0 | 7.225225  | 3.028939  | -0.104014 |
| 72 | 6  | 0 | 9.600622  | 0.597110  | -0.103120 |
| 73 | 1  | 0 | 9.634376  | 2.727407  | -0.157079 |
| 74 | 1  | 0 | 10.676031 | 0.460998  | -0.128856 |
| 75 | 7  | 0 | 9.122250  | -1.813639 | -0.008998 |
| 76 | 7  | 0 | 6.629087  | -1.516012 | 0.050953  |
| 77 | 16 | 0 | 7.751928  | -2.718750 | 0.038584  |

## Ir5

| Center Number | Atomic Number | Atomic Type | Coordinates (Angstroms) |           |           |
|---------------|---------------|-------------|-------------------------|-----------|-----------|
|               |               |             | X                       | Y         | Z         |
| 1             | 77            | 0           | -1.281607               | -0.134076 | -0.109992 |
| 2             | 6             | 0           | -3.557230               | -2.031057 | 0.009465  |

|    |   |   |           |           |           |
|----|---|---|-----------|-----------|-----------|
| 3  | 6 | 0 | -1.889133 | -2.491478 | -1.668248 |
| 4  | 6 | 0 | -4.366384 | -3.050926 | -0.350479 |
| 5  | 6 | 0 | -3.819208 | -1.098018 | 1.175168  |
| 6  | 6 | 0 | -2.742698 | -3.696864 | -2.125701 |
| 7  | 1 | 0 | -0.958355 | -2.281600 | -2.151737 |
| 8  | 6 | 0 | -3.922972 | -3.955669 | -1.510112 |
| 9  | 1 | 0 | -5.289102 | -3.227526 | 0.161620  |
| 10 | 6 | 0 | -2.724517 | -0.069643 | 1.327754  |
| 11 | 6 | 0 | -4.877045 | -1.144334 | 2.011435  |
| 12 | 1 | 0 | -2.405248 | -4.323131 | -2.924708 |
| 13 | 1 | 0 | -4.534250 | -4.776077 | -1.825647 |
| 14 | 6 | 0 | -2.745631 | 0.812682  | 2.351522  |
| 15 | 6 | 0 | -4.935357 | -0.133956 | 3.177431  |
| 16 | 1 | 0 | -5.655131 | -1.865298 | 1.871698  |
| 17 | 6 | 0 | -3.931876 | 0.776288  | 3.342834  |
| 18 | 1 | 0 | -1.956996 | 1.525693  | 2.472789  |
| 19 | 1 | 0 | -5.761681 | -0.147978 | 3.857117  |
| 20 | 1 | 0 | -3.966726 | 1.467689  | 4.159502  |
| 21 | 7 | 0 | -2.303606 | -1.732307 | -0.700597 |
| 22 | 7 | 0 | -0.180835 | -0.215046 | -1.720919 |
| 23 | 6 | 0 | -0.482277 | 0.870877  | -2.685591 |
| 24 | 6 | 0 | 1.269260  | -0.010751 | -1.432102 |
| 25 | 6 | 0 | 0.666043  | 1.375729  | -3.187001 |
| 26 | 1 | 0 | -1.464418 | 1.208061  | -2.942415 |
| 27 | 6 | 0 | 1.813171  | 0.797944  | -2.367058 |
| 28 | 1 | 0 | 0.753080  | 2.066664  | -3.999769 |
| 29 | 1 | 0 | 2.854408  | 1.006449  | -2.497748 |
| 30 | 7 | 0 | -0.085605 | -1.328805 | 0.873384  |
| 31 | 6 | 0 | 1.364178  | -1.351247 | 0.687454  |
| 32 | 6 | 0 | -0.418627 | -2.200475 | 1.783395  |
| 33 | 6 | 0 | 1.930821  | -2.322562 | 1.720794  |
| 34 | 6 | 0 | 0.864716  | -2.848643 | 2.365221  |
| 35 | 1 | 0 | -1.418971 | -2.426728 | 2.086360  |
| 36 | 1 | 0 | 2.962675  | -2.547125 | 1.894910  |
| 37 | 1 | 0 | 0.899777  | -3.585069 | 3.141215  |
| 38 | 6 | 0 | 2.042190  | -0.636653 | -0.244553 |
| 39 | 6 | 0 | -0.646803 | 2.690885  | 0.369968  |
| 40 | 6 | 0 | 0.984989  | 1.104075  | 1.180800  |
| 41 | 6 | 0 | -0.009398 | 3.772608  | 0.868230  |
| 42 | 6 | 0 | -1.921550 | 2.746942  | -0.473662 |
| 43 | 6 | 0 | 1.791647  | 2.289937  | 1.753422  |
| 44 | 1 | 0 | 1.352411  | 0.104908  | 1.283334  |
| 45 | 6 | 0 | 1.314046  | 3.552926  | 1.619466  |
| 46 | 1 | 0 | -0.411413 | 4.756611  | 0.738789  |
| 47 | 6 | 0 | -2.386839 | 1.371530  | -0.904310 |
| 48 | 6 | 0 | -2.586943 | 3.863845  | -0.837630 |

|    |   |   |           |           |           |
|----|---|---|-----------|-----------|-----------|
| 49 | 1 | 0 | 2.721194  | 2.115753  | 2.254385  |
| 50 | 1 | 0 | 1.851554  | 4.382820  | 2.027980  |
| 51 | 6 | 0 | -3.441364 | 1.219668  | -1.733380 |
| 52 | 6 | 0 | -3.817805 | 3.717629  | -1.760995 |
| 53 | 1 | 0 | -2.268044 | 4.827964  | -0.498778 |
| 54 | 6 | 0 | -4.208893 | 2.481491  | -2.191659 |
| 55 | 1 | 0 | -3.742092 | 0.247548  | -2.063241 |
| 56 | 1 | 0 | -4.363243 | 4.586620  | -2.065833 |
| 57 | 1 | 0 | -5.050169 | 2.385998  | -2.846258 |
| 58 | 7 | 0 | -0.142274 | 1.323662  | 0.580867  |
| 59 | 6 | 0 | 3.568071  | -0.454574 | -0.138094 |
| 60 | 6 | 0 | 4.096968  | 0.806580  | 0.171078  |
| 61 | 6 | 0 | 4.426093  | -1.543599 | -0.343011 |
| 62 | 6 | 0 | 5.483655  | 0.975998  | 0.283822  |
| 63 | 6 | 0 | 5.812871  | -1.370981 | -0.234787 |
| 64 | 6 | 0 | 6.340572  | -0.112861 | 0.081089  |
| 65 | 9 | 0 | 5.994843  | 2.187496  | 0.589035  |
| 66 | 9 | 0 | 3.269990  | 1.856732  | 0.361681  |
| 67 | 9 | 0 | 7.675724  | 0.049520  | 0.189526  |
| 68 | 9 | 0 | 6.641552  | -2.417592 | -0.433885 |
| 69 | 9 | 0 | 3.917920  | -2.757375 | -0.644705 |

---

## Ir6

---

| Center<br>Number | Atomic<br>Number | Atomic<br>Type | Coordinates (Angstroms) |           |           |
|------------------|------------------|----------------|-------------------------|-----------|-----------|
|                  |                  |                | X                       | Y         | Z         |
| 1                | 77               | 0              | -3.987966               | -0.098255 | 0.042038  |
| 2                | 6                | 0              | -5.394222               | 2.484708  | -0.014488 |
| 3                | 6                | 0              | -3.290331               | 2.706614  | 1.012136  |
| 4                | 6                | 0              | -5.630678               | 3.853624  | 0.178088  |
| 5                | 6                | 0              | -6.306918               | 1.538104  | -0.661462 |
| 6                | 6                | 0              | -3.477580               | 4.065726  | 1.223712  |
| 7                | 1                | 0              | -2.386565               | 2.198021  | 1.322839  |
| 8                | 6                | 0              | -4.674779               | 4.647951  | 0.798436  |
| 9                | 1                | 0              | -6.562525               | 4.290456  | -0.161839 |
| 10               | 6                | 0              | -5.827320               | 0.202533  | -0.760962 |
| 11               | 6                | 0              | -7.568010               | 1.903689  | -1.163871 |
| 12               | 1                | 0              | -2.701212               | 4.646112  | 1.709559  |
| 13               | 1                | 0              | -4.859332               | 5.707513  | 0.946768  |
| 14               | 6                | 0              | -6.674137               | -0.732729 | -1.380754 |
| 15               | 6                | 0              | -8.379455               | 0.951953  | -1.775361 |
| 16               | 1                | 0              | -7.923158               | 2.927639  | -1.081671 |
| 17               | 6                | 0              | -7.927149               | -0.368956 | -1.882596 |

|    |   |   |           |           |           |
|----|---|---|-----------|-----------|-----------|
| 18 | 1 | 0 | -6.351726 | -1.766361 | -1.479756 |
| 19 | 1 | 0 | -9.354015 | 1.234842  | -2.163365 |
| 20 | 1 | 0 | -8.556313 | -1.117900 | -2.358888 |
| 21 | 7 | 0 | -4.219405 | 1.933214  | 0.416037  |
| 22 | 7 | 0 | -1.974610 | -0.250954 | 0.917681  |
| 23 | 6 | 0 | -1.693646 | -0.567647 | 2.186499  |
| 24 | 6 | 0 | -0.747599 | -0.072023 | 0.272699  |
| 25 | 6 | 0 | -0.292911 | -0.609684 | 2.422867  |
| 26 | 6 | 0 | 0.307450  | -0.299620 | 1.219080  |
| 27 | 1 | 0 | 0.189081  | -0.840003 | 3.364016  |
| 28 | 7 | 0 | -2.951956 | 0.434151  | -1.824298 |
| 29 | 6 | 0 | -1.573524 | 0.520505  | -2.041545 |
| 30 | 6 | 0 | -3.538594 | 0.742566  | -2.986335 |
| 31 | 6 | 0 | -1.345240 | 0.899527  | -3.406438 |
| 32 | 6 | 0 | -2.585015 | 1.038665  | -3.997339 |
| 33 | 1 | 0 | -2.804354 | 1.316891  | -5.019835 |
| 34 | 6 | 0 | -0.585949 | 0.280947  | -1.074744 |
| 35 | 6 | 0 | -4.475275 | -2.919352 | 0.719803  |
| 36 | 6 | 0 | -3.383070 | -2.742699 | -1.354747 |
| 37 | 6 | 0 | -4.464979 | -4.317168 | 0.604288  |
| 38 | 6 | 0 | -5.021148 | -2.155060 | 1.844733  |
| 39 | 6 | 0 | -3.347766 | -4.121302 | -1.513931 |
| 40 | 1 | 0 | -2.972337 | -2.071130 | -2.097877 |
| 41 | 6 | 0 | -3.903028 | -4.922667 | -0.512523 |
| 42 | 1 | 0 | -4.895093 | -4.924234 | 1.392459  |
| 43 | 6 | 0 | -4.889695 | -0.742376 | 1.741641  |
| 44 | 6 | 0 | -5.628775 | -2.755452 | 2.961312  |
| 45 | 1 | 0 | -2.895374 | -4.548419 | -2.401941 |
| 46 | 1 | 0 | -3.895865 | -6.004749 | -0.600559 |
| 47 | 6 | 0 | -5.399809 | 0.022621  | 2.804977  |
| 48 | 6 | 0 | -6.118873 | -1.967157 | 3.998781  |
| 49 | 1 | 0 | -5.722658 | -3.836130 | 3.028638  |
| 50 | 6 | 0 | -6.001482 | -0.574230 | 3.916694  |
| 51 | 1 | 0 | -5.322346 | 1.106565  | 2.772086  |
| 52 | 1 | 0 | -6.588003 | -2.431679 | 4.861621  |
| 53 | 1 | 0 | -6.382233 | 0.048002  | 4.723820  |
| 54 | 7 | 0 | -3.933699 | -2.153310 | -0.275001 |
| 55 | 6 | 0 | 0.833288  | 0.425633  | -1.540401 |
| 56 | 6 | 0 | 1.518610  | 1.633195  | -1.419575 |
| 57 | 6 | 0 | 1.522434  | -0.644399 | -2.109482 |
| 58 | 6 | 0 | 2.840118  | 1.769802  | -1.837148 |
| 59 | 6 | 0 | 2.844162  | -0.517197 | -2.524115 |
| 60 | 6 | 0 | 3.541700  | 0.688997  | -2.382631 |
| 61 | 9 | 0 | 0.899348  | 2.702580  | -0.892460 |
| 62 | 9 | 0 | 3.416279  | 2.969256  | -1.716499 |
| 63 | 9 | 0 | 3.447613  | -1.598149 | -3.045419 |

|     |    |   |           |           |           |
|-----|----|---|-----------|-----------|-----------|
| 64  | 9  | 0 | 0.912146  | -1.832226 | -2.256145 |
| 65  | 1  | 0 | 1.367434  | -0.236327 | 1.013017  |
| 66  | 1  | 0 | -2.493534 | -0.752661 | 2.891017  |
| 67  | 1  | 0 | -4.617104 | 0.740449  | -3.069343 |
| 68  | 1  | 0 | -0.378907 | 1.048324  | -3.868447 |
| 69  | 16 | 0 | 5.210430  | 0.888131  | -2.977623 |
| 70  | 6  | 0 | 6.212059  | 0.495222  | -1.464590 |
| 71  | 6  | 0 | 5.995958  | -0.973685 | -1.027174 |
| 72  | 6  | 0 | 6.036484  | 1.317887  | 0.909691  |
| 73  | 6  | 0 | 6.034201  | -1.319076 | 0.478803  |
| 74  | 1  | 0 | 5.018794  | -1.299119 | -1.369675 |
| 75  | 6  | 0 | 6.148656  | -0.127340 | 1.481541  |
| 76  | 1  | 0 | 6.965104  | 1.835355  | 1.183126  |
| 77  | 1  | 0 | 6.875012  | -1.978312 | 0.668662  |
| 78  | 8  | 0 | 5.893418  | 1.465199  | -0.507393 |
| 79  | 6  | 0 | 4.876390  | 2.087591  | 1.550870  |
| 80  | 1  | 0 | 3.914290  | 1.639565  | 1.298133  |
| 81  | 1  | 0 | 4.999587  | 2.127722  | 2.631978  |
| 82  | 8  | 0 | 4.851642  | 3.434466  | 1.042989  |
| 83  | 6  | 0 | 5.236834  | 4.429996  | 1.874876  |
| 84  | 8  | 0 | 5.617820  | 4.256305  | 3.016451  |
| 85  | 6  | 0 | 5.118622  | 5.767687  | 1.189032  |
| 86  | 1  | 0 | 5.721254  | 5.777502  | 0.275211  |
| 87  | 1  | 0 | 4.079369  | 5.946854  | 0.894245  |
| 88  | 1  | 0 | 5.452468  | 6.557301  | 1.862346  |
| 89  | 8  | 0 | 4.832256  | -2.078159 | 0.730582  |
| 90  | 6  | 0 | 4.965625  | -3.375197 | 1.115074  |
| 91  | 8  | 0 | 6.035040  | -3.919111 | 1.300420  |
| 92  | 6  | 0 | 3.619407  | -4.040095 | 1.244043  |
| 93  | 1  | 0 | 3.389746  | -4.551525 | 0.301711  |
| 94  | 1  | 0 | 3.661247  | -4.792888 | 2.033587  |
| 95  | 1  | 0 | 2.826604  | -3.317349 | 1.444227  |
| 96  | 8  | 0 | 6.885878  | -1.833960 | -1.787643 |
| 97  | 6  | 0 | 8.225045  | -1.865247 | -1.540426 |
| 98  | 8  | 0 | 8.764256  | -1.249550 | -0.639547 |
| 99  | 6  | 0 | 8.925036  | -2.842223 | -2.446115 |
| 100 | 1  | 0 | 9.442986  | -2.278228 | -3.230493 |
| 101 | 1  | 0 | 9.680225  | -3.387623 | -1.875652 |
| 102 | 1  | 0 | 8.226921  | -3.535859 | -2.916656 |
| 103 | 1  | 0 | 7.230998  | 0.620757  | -1.835691 |
| 104 | 1  | 0 | 7.117230  | -0.220323 | 1.969502  |
| 105 | 8  | 0 | 5.154575  | -0.280217 | 2.517424  |
| 106 | 6  | 0 | 5.581759  | -0.532670 | 3.785711  |
| 107 | 8  | 0 | 6.749693  | -0.646275 | 4.094587  |
| 108 | 6  | 0 | 4.422629  | -0.638794 | 4.743289  |
| 109 | 1  | 0 | 4.422246  | -1.640390 | 5.185274  |

|     |   |   |          |           |          |
|-----|---|---|----------|-----------|----------|
| 110 | 1 | 0 | 4.569291 | 0.076590  | 5.558076 |
| 111 | 1 | 0 | 3.464828 | -0.454329 | 4.256072 |

---

### Ir7

| Center Number | Atomic Number | Atomic Type | Coordinates (Angstroms) |           |           |
|---------------|---------------|-------------|-------------------------|-----------|-----------|
|               |               |             | X                       | Y         | Z         |
| 1             | 77            | 0           | -4.410253               | -0.081763 | 0.164003  |
| 2             | 6             | 0           | -5.905887               | 2.439913  | -0.054480 |
| 3             | 6             | 0           | -3.877226               | 2.775576  | 1.085730  |
| 4             | 6             | 0           | -6.204603               | 3.803400  | 0.079672  |
| 5             | 6             | 0           | -6.747388               | 1.436760  | -0.712815 |
| 6             | 6             | 0           | -4.129157               | 4.131508  | 1.244480  |
| 7             | 1             | 0           | -2.972735               | 2.314620  | 1.462580  |
| 8             | 6             | 0           | -5.318862               | 4.653666  | 0.729962  |
| 9             | 1             | 0           | -7.130616               | 4.191847  | -0.328003 |
| 10            | 6             | 0           | -6.221043               | 0.114557  | -0.726671 |
| 11            | 6             | 0           | -7.987389               | 1.740113  | -1.302130 |
| 12            | 1             | 0           | -3.407081               | 4.755867  | 1.758702  |
| 13            | 1             | 0           | -5.551270               | 5.709122  | 0.833212  |
| 14            | 6             | 0           | -7.006937               | -0.873749 | -1.345724 |
| 15            | 6             | 0           | -8.734024               | 0.737658  | -1.914405 |
| 16            | 1             | 0           | -8.375057               | 2.755343  | -1.288099 |
| 17            | 6             | 0           | -8.238981               | -0.572320 | -1.932497 |
| 18            | 1             | 0           | -6.652242               | -1.901336 | -1.376310 |
| 19            | 1             | 0           | -9.691822               | 0.971610  | -2.370704 |
| 20            | 1             | 0           | -8.818747               | -1.361531 | -2.406481 |
| 21            | 7             | 0           | -4.736605               | 1.948388  | 0.459075  |
| 22            | 7             | 0           | -2.434739               | -0.123547 | 1.118532  |
| 23            | 6             | 0           | -2.192061               | -0.371271 | 2.410116  |
| 24            | 6             | 0           | -1.187854               | 0.033213  | 0.504362  |
| 25            | 6             | 0           | -0.799646               | -0.387800 | 2.693294  |
| 26            | 6             | 0           | -0.163202               | -0.138011 | 1.494128  |
| 27            | 1             | 0           | -0.349465               | -0.563014 | 3.661641  |
| 28            | 7             | 0           | -3.329868               | 0.423061  | -1.679285 |
| 29            | 6             | 0           | -1.945856               | 0.526816  | -1.855366 |
| 30            | 6             | 0           | -3.882743               | 0.686173  | -2.868154 |
| 31            | 6             | 0           | -1.680088               | 0.866161  | -3.223587 |
| 32            | 6             | 0           | -2.901947               | 0.967858  | -3.857376 |
| 33            | 1             | 0           | -3.095741               | 1.214186  | -4.893165 |
| 34            | 6             | 0           | -0.986181               | 0.327168  | -0.852454 |
| 35            | 6             | 0           | -4.792465               | -2.893878 | 0.930301  |
| 36            | 6             | 0           | -3.666242               | -2.743348 | -1.127830 |



|    |    |   |           |           |           |
|----|----|---|-----------|-----------|-----------|
| 37 | 6  | 0 | -4.721621 | -4.292757 | 0.864227  |
| 38 | 6  | 0 | -5.405049 | -2.115124 | 2.010485  |
| 39 | 6  | 0 | -3.573902 | -4.124015 | -1.239321 |
| 40 | 1  | 0 | -3.263886 | -2.081930 | -1.884626 |
| 41 | 6  | 0 | -4.114317 | -4.913083 | -0.220529 |
| 42 | 1  | 0 | -5.142530 | -4.888804 | 1.665556  |
| 43 | 6  | 0 | -5.345647 | -0.702035 | 1.852472  |
| 44 | 6  | 0 | -6.010662 | -2.703443 | 3.134719  |
| 45 | 1  | 0 | -3.089090 | -4.562096 | -2.104584 |
| 46 | 1  | 0 | -4.061278 | -5.996258 | -0.270797 |
| 47 | 6  | 0 | -5.931391 | 0.074454  | 2.868243  |
| 48 | 6  | 0 | -6.573632 | -1.903200 | 4.124651  |
| 49 | 1  | 0 | -6.046148 | -3.784165 | 3.244057  |
| 50 | 6  | 0 | -6.532424 | -0.510190 | 3.986203  |
| 51 | 1  | 0 | -5.915986 | 1.158991  | 2.792242  |
| 52 | 1  | 0 | -7.041147 | -2.357528 | 4.993751  |
| 53 | 1  | 0 | -6.972182 | 0.121507  | 4.755094  |
| 54 | 7  | 0 | -4.259740 | -2.139578 | -0.079638 |
| 55 | 6  | 0 | 0.445289  | 0.444110  | -1.289058 |
| 56 | 6  | 0 | 1.169331  | 1.624101  | -1.127900 |
| 57 | 6  | 0 | 1.104520  | -0.634689 | -1.878252 |
| 58 | 6  | 0 | 2.497853  | 1.725186  | -1.529097 |
| 59 | 6  | 0 | 2.432274  | -0.540056 | -2.284751 |
| 60 | 6  | 0 | 3.161412  | 0.643682  | -2.116948 |
| 61 | 9  | 0 | 0.580982  | 2.698117  | -0.575027 |
| 62 | 9  | 0 | 3.125542  | 2.894070  | -1.348903 |
| 63 | 9  | 0 | 3.000721  | -1.617419 | -2.845744 |
| 64 | 9  | 0 | 0.455708  | -1.796733 | -2.061512 |
| 65 | 1  | 0 | 0.901468  | -0.073057 | 1.315755  |
| 66 | 1  | 0 | -3.009987 | -0.529696 | 3.100519  |
| 67 | 1  | 0 | -4.957421 | 0.666547  | -2.990584 |
| 68 | 1  | 0 | -0.700275 | 1.019976  | -3.654967 |
| 69 | 16 | 0 | 4.831964  | 0.813568  | -2.719805 |
| 70 | 6  | 0 | 5.838208  | 0.406214  | -1.222431 |
| 71 | 6  | 0 | 5.740985  | -1.044126 | -0.745074 |
| 72 | 6  | 0 | 6.482264  | 1.364397  | 0.808660  |
| 73 | 6  | 0 | 6.530304  | -1.261995 | 0.570714  |
| 74 | 1  | 0 | 4.693080  | -1.245671 | -0.522190 |
| 75 | 6  | 0 | 7.066451  | 0.010458  | 1.282241  |
| 76 | 1  | 0 | 7.289900  | 1.932856  | 0.329757  |
| 77 | 1  | 0 | 7.377824  | -1.916414 | 0.378907  |
| 78 | 1  | 0 | 6.881358  | -0.137309 | 2.347723  |
| 79 | 8  | 0 | 5.416072  | 1.190505  | -0.128042 |
| 80 | 6  | 0 | 5.928464  | 2.162267  | 1.986727  |
| 81 | 1  | 0 | 5.090098  | 1.631640  | 2.443722  |
| 82 | 1  | 0 | 6.716445  | 2.325626  | 2.724403  |

|     |   |   |           |           |           |
|-----|---|---|-----------|-----------|-----------|
| 83  | 8 | 0 | 5.397256  | 3.424456  | 1.550101  |
| 84  | 6 | 0 | 6.260034  | 4.471431  | 1.502823  |
| 85  | 8 | 0 | 7.427997  | 4.389096  | 1.825097  |
| 86  | 6 | 0 | 5.536104  | 5.739729  | 1.129706  |
| 87  | 1 | 0 | 5.068221  | 5.626848  | 0.146753  |
| 88  | 1 | 0 | 4.738895  | 5.944009  | 1.851788  |
| 89  | 1 | 0 | 6.239597  | 6.572628  | 1.112614  |
| 90  | 8 | 0 | 8.497293  | 0.113145  | 1.090592  |
| 91  | 6 | 0 | 9.287481  | -0.582668 | 1.950750  |
| 92  | 8 | 0 | 8.848646  | -1.282194 | 2.840372  |
| 93  | 6 | 0 | 10.743902 | -0.332017 | 1.656796  |
| 94  | 1 | 0 | 11.362017 | -0.898204 | 2.354048  |
| 95  | 1 | 0 | 10.972286 | -0.630663 | 0.628834  |
| 96  | 1 | 0 | 10.966548 | 0.736022  | 1.746616  |
| 97  | 8 | 0 | 5.654397  | -1.929193 | 1.502678  |
| 98  | 6 | 0 | 5.925583  | -3.230899 | 1.804674  |
| 99  | 8 | 0 | 6.821745  | -3.863299 | 1.288377  |
| 100 | 6 | 0 | 4.865959  | -3.797126 | 2.714441  |
| 101 | 1 | 0 | 3.991904  | -4.075826 | 2.114329  |
| 102 | 1 | 0 | 5.249258  | -4.692828 | 3.205546  |
| 103 | 1 | 0 | 4.545751  | -3.061197 | 3.455064  |
| 104 | 8 | 0 | 6.066304  | -2.033451 | -1.745424 |
| 105 | 6 | 0 | 7.302239  | -2.073923 | -2.307059 |
| 106 | 8 | 0 | 8.198569  | -1.301264 | -2.028555 |
| 107 | 6 | 0 | 7.389793  | -3.168331 | -3.338011 |
| 108 | 1 | 0 | 7.037908  | -2.776793 | -4.299645 |
| 109 | 1 | 0 | 8.430361  | -3.476672 | -3.452538 |
| 110 | 1 | 0 | 6.763803  | -4.020871 | -3.067513 |
| 111 | 1 | 0 | 6.859811  | 0.659227  | -1.528044 |

---

## Ir8

---

| Center<br>Number | Atomic<br>Number | Atomic<br>Type | Coordinates (Angstroms) |           |           |
|------------------|------------------|----------------|-------------------------|-----------|-----------|
|                  |                  |                | X                       | Y         | Z         |
| 1                | 77               | 0              | -1.703632               | -0.044590 | 0.131487  |
| 2                | 6                | 0              | -3.796221               | -1.201590 | -1.565723 |
| 3                | 6                | 0              | -2.087787               | -0.262185 | -2.883777 |
| 4                | 6                | 0              | -4.509507               | -1.528476 | -2.728094 |
| 5                | 6                | 0              | -4.173694               | -1.552918 | -0.194637 |
| 6                | 6                | 0              | -2.751593               | -0.575520 | -4.061469 |
| 7                | 1                | 0              | -1.123031               | 0.230013  | -2.882061 |
| 8                | 6                | 0              | -3.993263               | -1.211378 | -3.978605 |
| 9                | 1                | 0              | -5.462290               | -2.038217 | -2.646363 |
| 10               | 6                | 0              | -3.232519               | -1.185723 | 0.807708  |

|    |   |   |           |           |           |
|----|---|---|-----------|-----------|-----------|
| 11 | 6 | 0 | -5.339016 | -2.271520 | 0.123975  |
| 12 | 1 | 0 | -2.301552 | -0.324049 | -5.015290 |
| 13 | 1 | 0 | -4.546111 | -1.466171 | -4.877504 |
| 14 | 6 | 0 | -3.520336 | -1.575495 | 2.126777  |
| 15 | 6 | 0 | -5.593895 | -2.642011 | 1.440950  |
| 16 | 1 | 0 | -6.049403 | -2.546932 | -0.651065 |
| 17 | 6 | 0 | -4.677649 | -2.292861 | 2.441305  |
| 18 | 1 | 0 | -2.831677 | -1.317714 | 2.927369  |
| 19 | 1 | 0 | -6.494444 | -3.197387 | 1.687413  |
| 20 | 1 | 0 | -4.869569 | -2.580467 | 3.472791  |
| 21 | 7 | 0 | -2.599288 | -0.542483 | -1.668391 |
| 22 | 7 | 0 | -0.108791 | 1.304866  | -0.711709 |
| 23 | 6 | 0 | -0.280095 | 2.569774  | -1.112683 |
| 24 | 6 | 0 | 1.213463  | 1.185053  | -0.241826 |
| 25 | 6 | 0 | 0.895109  | 3.321662  | -0.821565 |
| 26 | 6 | 0 | 1.841700  | 2.497020  | -0.245012 |
| 27 | 7 | 0 | -0.112113 | -1.610711 | -0.195246 |
| 28 | 6 | 0 | 1.275219  | -1.357070 | -0.176447 |
| 29 | 6 | 0 | -0.278546 | -2.939060 | -0.302141 |
| 30 | 6 | 0 | 1.992461  | -2.611673 | -0.297038 |
| 31 | 6 | 0 | 0.994607  | -3.567673 | -0.371309 |
| 32 | 6 | 0 | 1.842945  | -0.062526 | -0.079099 |
| 33 | 6 | 0 | -1.629350 | 1.584237  | 2.586988  |
| 34 | 6 | 0 | -0.085314 | -0.176213 | 2.736991  |
| 35 | 6 | 0 | -1.234304 | 2.037640  | 3.853558  |
| 36 | 6 | 0 | -2.702532 | 2.159756  | 1.775131  |
| 37 | 6 | 0 | 0.332050  | 0.225767  | 3.998133  |
| 38 | 1 | 0 | 0.335462  | -1.046959 | 2.253441  |
| 39 | 6 | 0 | -0.249393 | 1.362573  | 4.562849  |
| 40 | 1 | 0 | -1.710633 | 2.911031  | 4.282856  |
| 41 | 6 | 0 | -2.966205 | 1.495008  | 0.548618  |
| 42 | 6 | 0 | -3.475124 | 3.258833  | 2.195382  |
| 43 | 1 | 0 | 1.099540  | -0.339852 | 4.513522  |
| 44 | 1 | 0 | 0.054861  | 1.713232  | 5.544338  |
| 45 | 6 | 0 | -4.069426 | 1.951101  | -0.193764 |
| 46 | 6 | 0 | -4.539485 | 3.703525  | 1.419139  |
| 47 | 1 | 0 | -3.256883 | 3.761675  | 3.133386  |
| 48 | 6 | 0 | -4.840510 | 3.036689  | 0.224978  |
| 49 | 1 | 0 | -4.328234 | 1.464736  | -1.130056 |
| 50 | 1 | 0 | -5.135712 | 4.551930  | 1.743216  |
| 51 | 1 | 0 | -5.679622 | 3.369130  | -0.382320 |
| 52 | 7 | 0 | -1.027933 | 0.484992  | 2.037477  |
| 53 | 6 | 0 | 3.329017  | -0.018227 | 0.139100  |
| 54 | 6 | 0 | 3.894638  | -0.174175 | 1.404600  |
| 55 | 6 | 0 | 4.206916  | 0.176493  | -0.927451 |
| 56 | 6 | 0 | 5.270562  | -0.134125 | 1.610098  |

|    |    |   |           |           |           |
|----|----|---|-----------|-----------|-----------|
| 57 | 6  | 0 | 5.587434  | 0.210539  | -0.753429 |
| 58 | 6  | 0 | 6.120728  | 0.056360  | 0.523477  |
| 59 | 9  | 0 | 5.780038  | -0.274746 | 2.839610  |
| 60 | 9  | 0 | 3.103933  | -0.361582 | 2.474958  |
| 61 | 9  | 0 | 7.442431  | 0.093438  | 0.707176  |
| 62 | 9  | 0 | 6.401642  | 0.388034  | -1.800488 |
| 63 | 9  | 0 | 3.724219  | 0.316646  | -2.172059 |
| 64 | 53 | 0 | 1.285528  | -5.671555 | -0.574270 |
| 65 | 53 | 0 | 1.122446  | 5.388222  | -1.259028 |
| 66 | 6  | 0 | 3.458479  | -2.908798 | -0.449299 |
| 67 | 1  | 0 | 3.885724  | -2.399199 | -1.320629 |
| 68 | 1  | 0 | 4.056843  | -2.631060 | 0.420147  |
| 69 | 1  | 0 | 3.598069  | -3.980893 | -0.603744 |
| 70 | 6  | 0 | -1.593684 | -3.646790 | -0.345847 |
| 71 | 1  | 0 | -2.095577 | -3.631494 | 0.628170  |
| 72 | 1  | 0 | -2.271498 | -3.189409 | -1.065039 |
| 73 | 1  | 0 | -1.446279 | -4.690808 | -0.630554 |
| 74 | 6  | 0 | 3.168772  | 2.955846  | 0.288255  |
| 75 | 1  | 0 | 3.444523  | 2.438656  | 1.207381  |
| 76 | 1  | 0 | 3.987405  | 2.821115  | -0.429902 |
| 77 | 1  | 0 | 3.117442  | 4.025189  | 0.513707  |
| 78 | 6  | 0 | -1.494176 | 3.093186  | -1.805599 |
| 79 | 1  | 0 | -2.193846 | 2.293990  | -2.040011 |
| 80 | 1  | 0 | -2.021613 | 3.833400  | -1.193614 |
| 81 | 1  | 0 | -1.201233 | 3.593518  | -2.736186 |

---

## REFERENCES

- [1] S. Mandal, D. K. Poria, R. Ghosh, P. S. Ray, P. Gupta, *Dalt. Trans.* **2014**, *43*, 17463–17474.
- [2] S. Moromizato, Y. Hisamatsu, T. Suzuki, Y. Matsuo, R. Abe, S. Aoki, *Inorg. Chem.* **2012**, *51*, 12697–12706.
- [3] N. Epelde-Elezcano, V. Martínez-Martínez, E. Peña-Cabrera, C. F. A. Gómez-Durán, I. L. Arbeloa, S. Lacombe, *RSC Adv.* **2016**, *6*, 41991–41998.
- [4] L. V. Lutkus, S. S. Rickenbach, T. M. McCormick, *J. Photochem. Photobiol. A Chem.* **2019**, *378*, 131–135.
- [5] R.W. Redmond, J.N. Gamlin, *J. Photochem. Photobiol.*, **1999**, *70*, 393.
